# Supplementary material for: Prediction of Neurodevelopmental Disorders Based on De Novo Coding Variation
Source: J Autism Dev Disord. 2022 May 20;53(3):963–76. doi: 10.1007/s10803-022-05586-z (PMC9986216; doi:10.1007/s10803-022-05586-z)
Supplement: Supplementary file 2 — Supplementary file2 (XLSX 2084 KB) Supplementary Table 6 (XLS). Ranking indicating relative importance of a gene to NDD risk according to rare de novo LGD and missense coding variation. Ranks, also known as the predicted probability of being a case for an artificial sample, closer to 1 symbolize greater importance to NDD risk. Multiple rankings are shown based on input features provided to SNN prediction models. Rankings are displayed on separate tabs, in which a tab label beginning with 'LGD' and 'Missense' indicates rankings based on LGD- and missense-specific variation, respectively. Tab labels containing 'Trivial' correspond to rankings created using trivial one-hot encoding of de novo mutations in input feature matrices, whereas labels containing 'Final' correspond to non-trivially trained models, in which LGD-specific models use both mutation information and gene score features. SFARI Gene scores (‘score’) and syndromic status (‘syndromic’) and OMIM disease associations (‘OMIM’) are also displayed [file 10803_2022_5586_MOESM2_ESM.xlsx]

## Sheet: LGD_Final
gene	probability	score	syndromic	OMIM
ARID1B	0.998688	1	0	Coffin-Siris syndrome 1, 135900 (3)
SYNGAP1	0.997291	1	0	Mental retardation, autosomal dominant 5, 612621 (3)
KMT2A	0.997153	1	0	Leukemia, myeloid/lymphoid or mixed-lineage (2), Wiedemann-Steiner syndrome, 605130 (3)
ADNP	0.996108	1	0	Helsmoortel-van der Aa syndrome, 615873 (3)
CHD8	0.995985	1	0	{Autism, susceptibility to, 18}, 615032 (3)
ANKRD11	0.995903	1	0	KBG syndrome, 148050 (3)
DDX3X	0.995075	1	0	Mental retardation, X-linked 102, 300958 (3)
DYRK1A	0.993659	1	0	Mental retardation, autosomal dominant 7, 614104 (3)
MED13L	0.989249	1	0	Mental retardation and distinctive facial features with or without cardiac defects, 616789 (3), Transposition of the great arteries, dextro-looped 1, 608808 (3)
POGZ	0.989125	1	0	White-Sutton syndrome, 616364 (3)
ASH1L	0.988878	1	0	Mental retardation, autosomal dominant 52, 617796 (3)
MECP2	0.988631	1	0	Encephalopathy, neonatal severe, 300673 (3), Mental retardation, X-linked syndromic, Lubs type, 300260 (3), Mental retardation, X-linked, syndromic 13, 300055 (3), Rett syndrome, 312750 (3), Rett syndrome, atypical, 312750 (3), Rett syndrome, preserved speech variant, 312750 (3), {Autism susceptibility, X-linked 3}, 300496 (3)
SETD5	0.988501	1	0	Mental retardation, autosomal dominant 23, 615761 (3)
SCN2A	0.98829	1	0	Epileptic encephalopathy, early infantile, 11, 613721 (3), Seizures, benign familial infantile, 3, 607745 (3)
FOXP1	0.987413	1	0	Mental retardation with language impairment and with or without autistic features, 613670 (3)
WDFY3	0.986237	1	0	?Microcephaly 18, primary, autosomal dominant, 617520 (3)
TCF4	0.984474	1	0	Corneal dystrophy, Fuchs endothelial, 3, 613267 (3), Pitt-Hopkins syndrome, 610954 (3), {Diabetes mellitus, type 2, susceptibility to}, 125853 (3)
SHANK3	0.981991	1	0	Phelan-McDermid syndrome, 606232 (3), {Schizophrenia 15}, 613950 (3)
KANSL1	0.981356	1	0	Koolen-De Vries syndrome, 610443 (3)
ASXL3	0.979261	1	0	Bainbridge-Ropers syndrome, 615485 (3)
KMT2C	0.978257	1	0	Kleefstra syndrome 2, 617768 (3)
CTNNB1	0.974193	1	0	Colorectal cancer, somatic, 114500 (3), Exudative vitreoretinopathy 7, 617572 (3), Hepatocellular carcinoma, somatic, 114550 (3), Medulloblastoma, somatic, 155255 (3), Mental retardation, autosomal dominant 19, 615075 (3), Ovarian cancer, somatic, 167000 (3), Pilomatricoma, somatic, 132600 (3)
CHAMP1	0.968896	1	0	Mental retardation, autosomal dominant 40, 616579 (3)
WAC	0.968182	1	0	Desanto-Shinawi syndrome, 616708 (3)
AHDC1	0.96326	1	0	Xia-Gibbs syndrome, 615829 (3)
CHD2	0.961786	1	0	Epileptic encephalopathy, childhood-onset, 615369 (3)
WDR45	0.960387			Neurodegeneration with brain iron accumulation 5, 300894 (3)
ANK2	0.956365	1	0	Cardiac arrhythmia, ankyrin-B-related, 600919 (3), Long QT syndrome 4, 600919 (3)
KAT6A	0.946527	2	1	Mental retardation, autosomal dominant 32, 616268 (3)
SRCAP	0.946266	1	0	Floating-Harbor syndrome, 136140 (3)
HNRNPU	0.942884	1	0	Epileptic encephalopathy, early infantile, 54, 617391 (3)
KDM6A	0.937994	2	0	Kabuki syndrome 2, 300867 (3)
CHD7	0.931699	1	0	CHARGE syndrome, 214800 (3), Hypogonadotropic hypogonadism 5 with or without anosmia, 612370 (3)
PHF3	0.929784	1	0
TCF20	0.927513	1	0
CLTC	0.926979			Mental retardation, autosomal dominant 56, 617854 (3)
SMC1A	0.926742		1	Cornelia de Lange syndrome 2, 300590 (3)
SATB2	0.926457	3	1	Glass syndrome, 612313 (3)
AUTS2	0.925616	1	0
NSD1	0.922754	1	0	Leukemia, acute myeloid, 601626 (1), Sotos syndrome 1, 117550 (3)
EP300	0.919876	1	0	Colorectal cancer, somatic, 114500 (3), Rubinstein-Taybi syndrome 2, 613684 (3)
KAT6B	0.91899	3	0	Genitopatellar syndrome, 606170 (3), SBBYSS syndrome, 603736 (3)
SPEN	0.918513	2	0	Megakaryoblastic leukemia, acute (2)
MED13	0.912808	1	0
SET	0.91267	2	0
QRICH1	0.910142	2	0	Ververi-Brady syndrome, 617982 (3)
NEXMIF	0.909803	2	0	Mental retardation, X-linked 98, 300912 (3)
BRPF1	0.909435			Intellectual developmental disorder with dysmorphic facies and ptosis, 617333 (3)
KDM6B	0.909354	1	0
TRIP12	0.908909	1	0	Mental retardation, autosomal dominant 49, 617752 (3)
SLC6A1	0.908078	1	0	Myoclonic-atonic epilepsy, 616421 (3)
SPAST	0.906272	1	0	Spastic paraplegia 4, autosomal dominant, 182601 (3)
TBL1XR1	0.905758	1	0	Mental retardation, autosomal dominant 41 , 616944 (3), Pierpont syndrome, 602342 (3)
GATAD2B	0.903913			Mental retardation, autosomal dominant 18, 615074 (3)
PHIP	0.899192	1	0	Developmental delay, intellectual disability, obesity, and dysmorphic features, 617991 (3)
HIVEP3	0.895748	2	0
HECTD4	0.888919	1	0
SETBP1	0.88462	1	0	Mental retardation, autosomal dominant 29, 616078 (3), Schinzel-Giedion midface retraction syndrome, 269150 (3)
MBD5	0.882977	1	0	Mental retardation, autosomal dominant 1, 156200 (3)
DIP2C	0.879003	2	0
ZC4H2	0.874856			Wieacker-Wolff syndrome, 314580 (3)
ZFHX3	0.866046			{Prostate cancer, susceptibility to, somatic}, 176807 (3)
CREBBP	0.865252	1	0	Rubinstein-Taybi syndrome 1, 180849 (3)
CUL3	0.863762	1	0	Pseudohypoaldosteronism, type IIE, 614496 (3)
KMT2D	0.863551			Kabuki syndrome 1, 147920 (3)
TNRC6B	0.856053	2	0
DSCAM	0.853127	1	0
MYT1L	0.847969	1	0	Mental retardation, autosomal dominant 39, 616521 (3)
PTEN	0.84786	1	0	Bannayan-Riley-Ruvalcaba syndrome, 153480 (3), Cowden syndrome 1, 158350 (3), Endometrial carcinoma, somatic, 608089 (3), Lhermitte-Duclos syndrome, 158350 (3), Macrocephaly/autism syndrome, 605309 (3), Malignant melanoma, somatic, 155600 (3), PTEN hamartoma tumor syndrome (3), Squamous cell carcinoma, head and neck, somatic, 275355 (3), VATER association with macrocephaly and ventriculomegaly, 2…
GRIN2B	0.847089	1	0	Epileptic encephalopathy, early infantile, 27, 616139 (3), Mental retardation, autosomal dominant 6, 613970 (3)
NSD2	0.846885	2	1
CASK	0.836807	1	0	FG syndrome 4, 300422 (3), Mental retardation and microcephaly with pontine and cerebellar hypoplasia, 300749 (3), Mental retardation, with or without nystagmus, 300422 (3)
DST	0.836286	3	0	?Neuropathy, hereditary sensory and autonomic, type VI, 614653 (3), Epidermolysis bullosa simplex, autosomal recessive 2, 615425 (3)
ANP32A	0.834089
NFIX	0.833611		1	Marshall-Smith syndrome, 602535 (3), Sotos syndrome 2, 614753 (3)
LARP4B	0.831281
MEIS2	0.83081	1	0	Cleft palate, cardiac defects, and mental retardation, 600987 (3)
OFD1	0.829736	3	0	?Retinitis pigmentosa 23, 300424 (3), Joubert syndrome 10, 300804 (3), Orofaciodigital syndrome I, 311200 (3), Simpson-Golabi-Behmel syndrome, type 2, 300209 (3)
KMT2E	0.824516	1	0
IQSEC2	0.824448	1	0	Mental retardation, X-linked 1/78, 309530 (3)
TBR1	0.824041	1	0
LMTK3	0.82249
KIF11	0.821898			Microcephaly with or without chorioretinopathy, lymphedema, or mental retardation, 152950 (3)
CHD5	0.819547
UBN2	0.818197	2	0
UBR3	0.818141
HECTD1	0.817623
PHF2	0.815772	1	0
CAMK2A	0.813853	3	1	Mental retardation, autosomal dominant 53, 617798 (3)
SOX5	0.813325	1	0	Lamb-Shaffer syndrome, 616803 (3)
SKIDA1	0.813281
LRP2	0.811558	3	0	Donnai-Barrow syndrome, 222448 (3)
TCF7L2	0.809046	1	0	{Diabetes mellitus, type 2, susceptibility to}, 125853 (3)
IRF2BPL	0.807739	1	0
NAA15	0.805837	1	0	Mental retardation, autosomal dominant 50, 617787 (3)
NFIB	0.804084	3	1
DOT1L	0.80226
ARHGEF9	0.801005	1	0	Epileptic encephalopathy, early infantile, 8, 300607 (3)
ZBTB18	0.796044			Mental retardation, autosomal dominant 22, 612337 (3)
STXBP1	0.795924	1	0	Epileptic encephalopathy, early infantile, 4, 612164 (3)
SMARCC2	0.792042	1	0
KCNQ2	0.791525	2	0	Epileptic encephalopathy, early infantile, 7, 613720 (3), Myokymia, 121200 (3), Seizures, benign neonatal, 1, 121200 (3)
HDAC8	0.791465		1	Cornelia de Lange syndrome 5, 300882 (3)
NF1	0.790711	1	0	Leukemia, juvenile myelomonocytic, 607785 (3), Neurofibromatosis, familial spinal, 162210 (3), Neurofibromatosis, type 1, 162200 (3), Neurofibromatosis-Noonan syndrome, 601321 (3), Watson syndrome, 193520 (3)
TAOK2	0.789452	2	0
KMT5B	0.787966	1	0	Mental retardation, autosomal dominant 51, 617788 (3)
RIMS1	0.78793	1	0	Cone-rod dystrophy 7, 603649 (3)
FOXG1	0.787598	1	0	Rett syndrome, congenital variant, 613454 (3)
UPF3B	0.787442	1	0	Mental retardation, X-linked, syndromic 14, 300676 (3)
PURA	0.783765			Mental retardation, autosomal dominant 31, 616158 (3)
LEO1	0.777558	2	0
SIN3A	0.777056	1	0	Witteveen-Kolk syndrome, 613406 (3)
BAZ2B	0.77311	1	0
CNOT3	0.771258	1	0
TAB2	0.769614			Congenital heart defects, nonsyndromic, 2, 614980 (3)
BCL11A	0.759951	1	0	Dias-Logan syndrome, 617101 (3)
NR3C2	0.757306	1	0	Hypertension, early-onset, autosomal dominant, with exacerbation in pregnancy, 605115 (3), Pseudohypoaldosteronism type I, autosomal dominant, 177735 (3)
PUM2	0.748052
FBN1	0.74378	2	0	Acromicric dysplasia, 102370 (3), Ectopia lentis, familial, 129600 (3), Geleophysic dysplasia 2, 614185 (3), MASS syndrome, 604308 (3), Marfan lipodystrophy syndrome, 616914 (3), Marfan syndrome, 154700 (3), Stiff skin syndrome, 184900 (3), Weill-Marchesani syndrome 2, dominant, 608328 (3)
DOP1A	0.733721
USP9X	0.725654	1	1	Mental retardation, X-linked 99, 300919 (3), Mental retardation, X-linked 99, syndromic, female-restricted, 300968 (3)
GIGYF1	0.724946	1	0
DVL3	0.716569	3	0	Robinow syndrome, autosomal dominant 3, 616894 (3)
CIC	0.713915	1	0	Mental retardation, autosomal dominant 45, 617600 (3)
CNOT1	0.711983	2	0
EFTUD2	0.707178			Mandibulofacial dysostosis, Guion-Almeida type, 610536 (3)
GPRIN1	0.706484
PER2	0.706484	2	0	Advanced sleep phase syndrome, familial, 1, 604348 (3)
ARID1A	0.704735			Coffin-Siris syndrome 2, 614607 (3)
UBAP2L	0.704287
PRPF8	0.699693			Retinitis pigmentosa 13, 600059 (3)
CDC42BPB	0.696271	2	0
DMXL2	0.690334	3	0	?Deafness, autosomal dominant 71, 617605 (3), ?Polyendocrine-polyneuropathy syndrome, 616113 (3)
ARID5B	0.687731
TANC2	0.686482	1	0
CDKL5	0.685122	1	0	Epileptic encephalopathy, early infantile, 2, 300672 (3)
KDM3B	0.682198	1	0
SEMA6A	0.677779
ITSN1	0.677621	3	0
DSCAML1	0.675502
MAP1B	0.675405
NOTCH2	0.673565			Alagille syndrome 2, 610205 (3), Hajdu-Cheney syndrome, 102500 (3)
ATP1A1	0.672366	3	1	Charcot-Marie-Tooth disease, axonal, type 2DD, 618036 (3)
SETD1A	0.671337	1	0
RANBP2	0.670286			{Encephalopathy, acute, infection-induced, 3, susceptibility to}, 608033 (3)
SETD2	0.669447	1	0	Luscan-Lumish syndrome, 616831 (3)
EMSY	0.666726	2	0
JARID2	0.666118	2	0
MED12	0.663408			Lujan-Fryns syndrome, 309520 (3), Ohdo syndrome, X-linked, 300895 (3), Opitz-Kaveggia syndrome, 305450 (3)
ROBO2	0.662472	2	0	Vesicoureteral reflux 2, 610878 (3)
RAI1	0.662073	1	0	Smith-Magenis syndrome, 182290 (3)
ARID2	0.661549	3	1	Coffin-Siris syndrome 6, 617808 (3)
ATP13A3	0.660812
ARHGAP5	0.660147	3	0
INTS6	0.658567	2	0
GLYR1	0.657039
WDR26	0.656447		1	Skraban-Deardorff syndrome, 617616 (3)
PHF12	0.656287	1	0
RAPGEF4	0.65446	3	0
RNF38	0.653874	3	0
ADGRB1	0.653051
PPP1R12A	0.652371
PPFIA2	0.652323
ZNF462	0.650142	1	0
CHD1	0.649346	3	1	Pilarowski-Bjornsson syndrome, 617682 (3)
CDKN2AIP	0.649164
NLGN4X	0.648887	1	0
ZMIZ1	0.648209	2	1
SLIT2	0.647515
KALRN	0.647357			{Coronary heart disease, susceptibility to, 5}, 608901 (3)
FOXP2	0.646257	1	0	Speech-language disorder-1, 602081 (3)
L1CAM	0.645594			CRASH syndrome, 303350 (3), Corpus callosum, partial agenesis of, 304100 (3), Hydrocephalus due to aqueductal stenosis, 307000 (3), Hydrocephalus with Hirschsprung disease, 307000 (3), Hydrocephalus with congenital idiopathic intestinal pseudoobstruction, 307000 (3), MASA syndrome, 303350 (3)
SPATA2	0.645525
COL3A1	0.643936			Ehlers-Danlos syndrome, vascular type, 130050 (3)
KLHDC10	0.642279
STXBP5L	0.642253
CACNA1E	0.641966	1	0
EHMT1	0.641572	1	0	Kleefstra syndrome 1, 610253 (3)
RARG	0.641545
RFX7	0.641421
FIGN	0.640819
YTHDC1	0.640644
SCN1A	0.640059	1	0	Epilepsy, generalized, with febrile seizures plus, type 2, 604403 (3), Epileptic encephalopathy, early infantile, 6 (Dravet syndrome), 607208 (3), Febrile seizures, familial, 3A, 604403 (3), Migraine, familial hemiplegic, 3, 609634 (3)
CNKSR2	0.639933	2	1	Mental retardation, X-linked, syndromic, Houge type, 301008 (3)
SRPK2	0.63979
GCM1	0.639549
BTAF1	0.63898	2	0
GRIA2	0.638444	1	0
CKAP5	0.638355
XKR6	0.637749
BRSK1	0.637376
COPB2	0.637201			?Microcephaly 19, primary, autosomal recessive, 617800 (3)
BCORL1	0.63699		1
ZNF536	0.635705
TLK2	0.635665	1	0
CTCF	0.635469	1	0	Mental retardation, autosomal dominant 21, 615502 (3)
MSL3	0.634736	2	1
SAP130	0.633959
CHM	0.633214	3	0	Charcot-Marie-Tooth disease, dominant intermediate D, 607791 (3), Charcot-Marie-Tooth disease, type 1B, 118200 (3), Charcot-Marie-Tooth disease, type 2I, 607677 (3), Charcot-Marie-Tooth disease, type 2J, 607736 (3), Choroideremia, 303100 (3), Dejerine-Sottas disease, 145900 (3), Neuropathy, congenital hypomyelinating, 605253 (3), Roussy-Levy syndrome, 180800 (3)
EPHB2	0.633125	3	0	{Prostate cancer/brain cancer susceptibility, somatic}, 603688 (3)
FASN	0.632893
ZMYND11	0.632672	2	0	Mental retardation, autosomal dominant 30, 616083 (3)
ZC3H11A	0.631629	3	0
KDM3A	0.63142
MAP2	0.631108
XPO4	0.629809
SNRNP70	0.629302
CHD3	0.629218	1	0
TNRC18	0.629071
OXR1	0.628756
CASZ1	0.628006	1	0
NBEA	0.627288	1	0
PCDH19	0.626991	1	0	Epileptic encephalopathy, early infantile, 9, 300088 (3)
SUFU	0.626892			Basal cell nevus syndrome, 109400 (3), Joubert syndrome 32, 617757 (3), Medulloblastoma, desmoplastic, 155255 (3), {Meningioma, familial, susceptibility to}, 607174 (3)
G3BP2	0.626136
SLC6A3	0.624968	2	0	Parkinsonism-dystonia, infantile, 613135 (3), {Nicotine dependence, protection against}, 188890 (3)
MAP4K4	0.62451
FBXW11	0.624295
ZFC3H1	0.624291
DNAJC11	0.623896
HNRNPD	0.623293
PHF8	0.623184		1	Mental retardation syndrome, X-linked, Siderius type, 300263 (3)
ZC3H4	0.623083	2	0
CNOT4	0.622985
TOPBP1	0.621293
BRWD1	0.620843
EBF3	0.620662	1	0	Hypotonia, ataxia, and delayed development syndrome, 617330 (3)
XRN1	0.62066
HSPA9	0.62042			Anemia, sideroblastic, 4, 182170 (3), Even-plus syndrome, 616854 (3)
DGCR8	0.62022
INO80D	0.619168
PSMD12	0.618759	1	0	Stankiewicz-Isidor syndrome, 617516 (3)
MEMO1	0.618634	3	0
ILF2	0.618436	2	0
STAG2	0.617703
TOP2B	0.617444
KIAA0232	0.617338	1	0
STAU1	0.61717
SPRY2	0.615516			{?IgA nephropathy, susceptibility to, 3}, 616818 (3)
KAT2B	0.615466	2	0
HEATR1	0.615404
BRSK2	0.61482	1	0
PRPF39	0.614751	3	0
FBXO11	0.614612	3	1
SMARCA5	0.614335
RPS6KA3	0.614116	3	1	Coffin-Lowry syndrome, 303600 (3), Mental retardation, X-linked 19, 300844 (3)
DNM1	0.613716			Epileptic encephalopathy, early infantile, 31, 616346 (3)
RIPOR1	0.613696
UBE3A	0.613098	1	0	Angelman syndrome, 105830 (3)
SNAP25	0.61307	3	0	?Myasthenic syndrome, congenital, 18, 616330 (3)
SMARCE1	0.612967			Coffin-Siris syndrome 5, 616938 (3), {Meningioma, familial, susceptibility to}, 607174 (3)
PORCN	0.612335			Focal dermal hypoplasia, 305600 (3)
PPP1R7	0.610765
PSMD3	0.610758
NOTCH1	0.609995			Adams-Oliver syndrome 5, 616028 (3), Aortic valve disease 1, 109730 (3)
ELAVL2	0.609985	3	0
SRSF11	0.609299	2	0
HIVEP2	0.60926	1	0	Mental retardation, autosomal dominant 43, 616977 (3)
PHF21A	0.608838	1	0
RASGEF1A	0.608733
FAM169A	0.608413
AHCYL2	0.607394
FNBP4	0.607287
ANOS1	0.606979
SYVN1	0.606915
CELF2	0.606424
SIK3	0.606382
NOP2	0.60583
KHSRP	0.6058
SPAG9	0.605656
TBCEL	0.604691
SLC2A1	0.603949			Dystonia 9, 601042 (3), GLUT1 deficiency syndrome 1, infantile onset, severe, 606777 (3), GLUT1 deficiency syndrome 2, childhood onset, 612126 (3), Stomatin-deficient cryohydrocytosis with neurologic defects, 608885 (3), {Epilepsy, idiopathic generalized, susceptibility to, 12}, 614847 (3)
ZNF292	0.603775	1	0
PRR14L	0.603346
ZNF687	0.603311			Paget disease of bone 6, 616833 (3)
CPSF7	0.601641
MORC3	0.6005
CDC23	0.600319
PITPNA	0.599475
ECE1	0.598392			?Hirschsprung disease, cardiac defects, and autonomic dysfunction, 613870 (3), {Hypertension, essential, susceptibility to}, 145500 (3)
SF1	0.59783			46, XX sex reversal 4, 617480 (3), 46XY sex reversal 3, 612965 (3), Adrenocortical insufficiency, 612964 (3), Premature ovarian failure 7, 612964 (3), Spermatogenic failure 8, 613957 (3)
OPHN1	0.597497	2	0	Mental retardation, X-linked, with cerebellar hypoplasia and distinctive facial appearance, 300486 (3)
PAFAH1B2	0.597394	3	0
ERF	0.597112			Chitayat syndrome, 617180 (3), Craniosynostosis 4, 600775 (3)
ADCY9	0.596688
ADAMTS2	0.595711			Ehlers-Danlos syndrome, dermatosparaxis type, 225410 (3)
PBX1	0.594564	3	0	Congenital anomalies of kidney and urinary tract syndrome with or without hearing loss, abnormal ears, or developmental delay, 617641 (3)
TFE3	0.594548			Renal cell carcinoma, papillary, 1, 300854 (3)
TMEM131	0.594546
MOV10	0.594086
SRRM2	0.593812
PAX5	0.593666	1	0	{Leukemia, acute lymphoblastic, susceptibility to, 3}, 615545 (3)
HGF	0.593496			?Fibromatosis, gingival, 1, 135300 (3), Deafness, autosomal recessive 39, 608265 (3), Noonan syndrome 4, 610733 (3), {Crohn disease-associated growth failure}, 266600 (3), {Diabetes, susceptibility to}, 222100, 125853 (3), {Intracranial hemorrhage in brain cerebrovascular malformations, susceptibility to}, 108010 (3), {Kaposi sarcoma, susceptibility to}, 148000 (3), {Rheumatoid arthritis, systemi…
USP15	0.591614	2	0
ZC3H18	0.591368
SLC6A8	0.5913	3	0	Cerebral creatine deficiency syndrome 1, 300352 (3)
ZBTB1	0.591148
ZBTB7A	0.591026
LPGAT1	0.590444
USF3	0.590345
NOL6	0.58988
ZFP36L2	0.588718
UNC79	0.5886	2	0
CBX4	0.588575
NCOR1	0.587919	2	0
LRRTM2	0.585693
CAPRIN1	0.58549	1	0
CELF4	0.58441	1	0
NONO	0.582712			Mental retardation, X-linked, syndromic 34, 300967 (3)
PRKAR1A	0.580136			Acrodysostosis 1, with or without hormone resistance, 101800 (3), Adrenocortical tumor, somatic, (3), Carney complex, type 1, 160980 (3), Myxoma, intracardiac, 255960 (3), Pigmented nodular adrenocortical disease, primary, 1, 610489 (3)
EYA1	0.579925			?Otofaciocervical syndrome, 166780 (3), Anterior segment anomalies with or without cataract, 602588 (3), Branchiootic syndrome 1, 602588 (3), Branchiootorenal syndrome 1, with or without cataracts, 113650 (3)
DYNC1LI2	0.57958
THSD7A	0.579286
CRTC2	0.578135
RASSF8	0.577437
FLT4	0.577249			Hemangioma, capillary infantile, somatic, 602089 (3), Lymphedema, hereditary, IA, 153100 (3)
ARHGAP30	0.576727
PCSK2	0.57387
NACC1	0.571609	1	0	Neurodevelopmental disorder with epilepsy, cataracts, feeding difficulties, and delayed brain myelination, 617393 (3)
DMD	0.570772		1	Becker muscular dystrophy, 300376 (3), Cardiomyopathy, dilated, 3B, 302045 (3), Duchenne muscular dystrophy, 310200 (3)
BRINP2	0.570619
RAB2A	0.56927	2	0
ANKHD1	0.568951
SPTBN1	0.567731
PTK7	0.567206	1	0
ANKHD1-EIF4EBP3	0.566957
CCNT2	0.56658
NMT1	0.566567
SIX2	0.565349
YTHDF3	0.564921
TWF2	0.564904
REXO1	0.562782
PHF1	0.562305
SKI	0.561631	1	0	Shprintzen-Goldberg syndrome, 182212 (3)
COL1A1	0.558501			Caffey disease, 114000 (3), Ehlers-Danlos syndrome, arthrochalasia type, 1, 130060 (3), Osteogenesis imperfecta, type I, 166200 (3), Osteogenesis imperfecta, type II, 166210 (3), Osteogenesis imperfecta, type III, 259420 (3), Osteogenesis imperfecta, type IV, 166220 (3), {Bone mineral density variation QTL, osteoporosis}, 166710 (3)
ANKRD12	0.557975
UBR5	0.557406	2	0
ZBTB20	0.557181	1	0	Primrose syndrome, 259050 (3)
PSMA3	0.556851
TMEM132B	0.555956
APH1A	0.55544	2	0
WDR13	0.553872
KDR	0.553777			Hemangioma, capillary infantile, somatic, 602089 (3), {Hemangioma, capillary infantile, susceptibility to}, 602089 (3)
GIGYF2	0.553474	1	0	{Parkinson disease 11}, 607688 (3)
NFATC4	0.55197
CHD4	0.551317			Sifrim-Hitz-Weiss syndrome, 617159 (3)
JADE2	0.551144
RELN	0.550209	1	0	Lissencephaly 2 (Norman-Roberts type), 257320 (3), {Epilepsy, familial temporal lobe, 7}, 616436 (3)
ASXL2	0.548755			Shashi-Pena syndrome, 617190 (3)
ZC3H14	0.548277			Mental retardation, autosomal recessive 56, 617125 (3)
DAAM1	0.547948
PHF5A	0.547792
EBF1	0.547585
FOSL2	0.546392
HMGN2	0.545018
DIP2A	0.544961	1	0
MYO9B	0.544761	2	0	{Celiac disease, susceptibility to, 4}, 609753 (3)
ADAMTS10	0.544432			Weill-Marchesani syndrome 1, recessive, 277600 (3)
ETF1	0.544369
ZEB2	0.542197			Mowat-Wilson syndrome, 235730 (3)
PTCHD1	0.541842	1	0	{Autism, susceptibility to, X-linked 4}, 300830 (3)
RNF146	0.540347
TPT1	0.538289
CDK13	0.533868		1	Congenital heart defects, dysmorphic facial features, and intellectual developmental disorder, 617360 (3)
SRGAP2	0.53204
BCOR	0.529932			Microphthalmia, syndromic 2, 300166 (3)
RERE	0.529527	1	0	Neurodevelopmental disorder with or without anomalies of the brain, eye, or heart, 616975 (3)
MTMR12	0.525062
LRP6	0.520075			Tooth agenesis, selective, 7, 616724 (3), {Coronary artery disease, autosomal dominant, 2}, 610947 (3)
SMARCD1	0.516803
STAM	0.514893
MSH2	0.514756			Colorectal cancer, hereditary nonpolyposis, type 1, 120435 (3), Mismatch repair cancer syndrome, 276300 (3), Muir-Torre syndrome, 158320 (3)
PLXNA3	0.51451	3	0
DCP1A	0.513809
MSL2	0.512152
CTNND1	0.510309			Blepharocheilodontic syndrome 2, 617681 (3)
IQSEC1	0.509356
FAM98A	0.509079
CYLC1	0.507964
SLC9A3	0.498369			Diarrhea 8, secretory sodium, congenital, 616868 (3)
ARMC8	0.498032
RNF111	0.497196
ZNF598	0.494541
SHANK2	0.494246	1	0	{Autism susceptibility 17}, 613436 (3)
IL27	0.49305
BCL9	0.486693
PQBP1	0.485519			Renpenning syndrome, 309500 (3)
ZFAND5	0.483389
CACNA2D3	0.482414	1	0
WNT9A	0.48157
ABL1	0.480101			Congenital heart defects and skeletal malformations syndrome, 617602 (3), Leukemia, Philadelphia chromosome-positive, resistant to imatinib (3)
LAMB1	0.476819	2	0	Lissencephaly 5, 615191 (3)
PAX2	0.46957			Glomerulosclerosis, focal segmental, 7, 616002 (3), Papillorenal syndrome, 120330 (3)
RIMBP2	0.461864
TNC	0.459691			Deafness, autosomal dominant 56, 615629 (3)
PLEKHO1	0.450854
PDHA1	0.449863			Pyruvate dehydrogenase E1-alpha deficiency, 312170 (3)
SLC35A2	0.449357			Congenital disorder of glycosylation, type IIm, 300896 (3)
STARD9	0.446969
TRIP11	0.446048			Achondrogenesis, type IA, 200600 (3)
ITGA5	0.43836
RO60	0.435746
PLA2G15	0.433843
TNFRSF8	0.43308
UNC5B	0.429103
EMX1	0.425062
EHBP1	0.424135			{Prostate cancer, hereditary, 12}, 611868 (3)
VPS13D	0.424036
SH2B1	0.415634
KATNAL2	0.412445	1	0
GET4	0.409636
DMWD	0.409415	3	0
CDH10	0.408586	3	0
PDCD1	0.399478	3	0	{Multiple sclerosis, disease progression, modifier of}, 126200 (3), {Systemic lupus erythematosus, susceptibility to, 2}, 605218 (3)
DNAJB6	0.398196			Muscular dystrophy, limb-girdle, type 1E, 603511 (3)
SLA	0.396273			Pontocerebellar hypoplasia type 2D, 613811 (3)
ASXL1	0.395844			Bohring-Opitz syndrome, 605039 (3), Myelodysplastic syndrome, somatic, 614286 (3)
TGFBRAP1	0.392764
NR2F6	0.38318
ATRNL1	0.382479
PPM1D	0.380462	3	1	Breast cancer, somatic, 114480 (3), Intellectual developmental disorder with gastrointestinal difficulties and high pain threshold, 617450 (3)
IGSF3	0.372572			?Lacrimal duct defect, 149700 (3)
NPAT	0.371006
PAXX	0.369633
VAPA	0.366154
PAK1IP1	0.363294
KLC1	0.349928
PISD	0.346415
FAM200A	0.344993
GAREM1	0.343216
NBEAL2	0.343178			Gray platelet syndrome, 139090 (3)
HSPG2	0.342162			Dyssegmental dysplasia, Silverman-Handmaker type, 224410 (3), Schwartz-Jampel syndrome, type 1, 255800 (3)
ADSS2	0.33918	3	0
EZR	0.33279
SREBF2	0.330828
NOP53	0.324062
NUDT17	0.323275
ERLIN1	0.322731			Spastic paraplegia 62, 615681 (3)
OPCML	0.320912			{Ovarian cancer, somatic}, 167000 (3)
VPS4B	0.315866
MDN1	0.314897
PRKAR1B	0.30929	3	0
RANBP17	0.308264	2	0
FOXO6	0.305613
SCAMP2	0.304058
NEDD9	0.300819
MYO1E	0.299973	3	0	Glomerulosclerosis, focal segmental, 6, 614131 (3)
PCDH11X	0.295737	3	0
LRP4	0.293961			?Myasthenic syndrome, congenital, 17, 616304 (3), Cenani-Lenz syndactyly syndrome, 212780 (3), Sclerosteosis 2, 614305 (3)
EXT1	0.29076	3	0	Chondrosarcoma, 215300 (3), Exostoses, multiple, type 1, 133700 (3)
NHSL1	0.288711
UNC80	0.286579	3	0	Hypotonia, infantile, with psychomotor retardation and characteristic facies 2, 616801 (3)
AKAP9	0.28228	2	0	?Long QT syndrome-11, 611820 (3)
CKB	0.281337
RIC1	0.280309
DYNC1H1	0.279221	1	0	Charcot-Marie-Tooth disease, axonal, type 20, 614228 (3), Mental retardation, autosomal dominant 13, 614563 (3), Spinal muscular atrophy, lower extremity-predominant 1, AD, 158600 (3)
TOGARAM1	0.275795
CSTF2T	0.274988
KIAA0100	0.274059
G3BP1	0.273983
TRRAP	0.273509	3	1
PDE11A	0.27323			Pigmented nodular adrenocortical disease, primary, 2, 610475 (3)
DNAJA1	0.272475
SLC25A6	0.272187
ADAMTS9	0.270642
C12orf4	0.27056
SLC35G1	0.269957
DENND5A	0.269682			Epileptic encephalopathy, early infantile, 49, 617281 (3)
SMAP2	0.268074			Dentin dysplasia, type I, with microdontia and misshapen teeth, 125400 (3)
TRAF7	0.26764	1	0
BIRC3	0.265366
HEATR5B	0.264916
SLC12A6	0.264877			Agenesis of the corpus callosum with peripheral neuropathy, 218000 (3)
KIF21A	0.264134			Fibrosis of extraocular muscles, congenital, 1, 135700 (3), Fibrosis of extraocular muscles, congenital, 3B, 135700 (3)
TRPM6	0.263258			Hypomagnesemia 1, intestinal, 602014 (3)
RBMS1	0.262811
LTN1	0.26092
HOXC10	0.259941
NFX1	0.259781
DHX29	0.259561
NFATC1	0.259187
SORCS3	0.258593	2	0
STRIP1	0.257817
SLC12A2	0.257672
PSD3	0.257119	3	0
YME1L1	0.254824			?Optic atrophy 11, 617302 (3)
LRBA	0.252963	3	0	Immunodeficiency, common variable, 8, with autoimmunity, 614700 (3)
ZDBF2	0.252577
CCPG1	0.251934
UBR4	0.251535
OSBPL8	0.251479
BRF1	0.249128			Cerebellofaciodental syndrome, 616202 (3)
KLB	0.247231
CEP295	0.246946
NALCN	0.246902			Congenital contractures of the limbs and face, hypotonia, and developmental delay, 616266 (3), Hypotonia, infantile, with psychomotor retardation and characteristic facies 1, 615419 (3)
AMOTL1	0.24648
FAM91A1	0.24604
BCAS3	0.246039
TBXT	0.244803
KIF2C	0.244275
FGD4	0.244137			Charcot-Marie-Tooth disease, type 4H, 609311 (3)
HUWE1	0.243395		1	Mental retardation, X-linked syndromic, Turner type, 300706 (3)
EDEM3	0.243284
TRPM3	0.243034
MEF2C	0.242693	1	0	Chromosome 5q14.3 deletion syndrome, 613443 (4), Mental retardation, stereotypic movements, epilepsy, and/or cerebral malformations, 613443 (3)
DDX60	0.242204
BIRC6	0.241679	3	0
ARL14EP	0.24018
CPD	0.239354
KLHL7	0.239314			Cold-induced sweating syndrome 3, 617055 (3), Retinitis pigmentosa 42, 612943 (3)
GIMAP1-GIMAP5	0.237277
RNF213	0.237074			{Moyamoya disease 2, susceptibility to}, 607151 (3)
NAPG	0.23656
INTS1	0.235973		1
GIMAP1	0.235723
CRYBG3	0.235251
MPHOSPH8	0.234616
RALGAPA2	0.233642
HERC1	0.233629			Macrocephaly, dysmorphic facies, and psychomotor retardation, 617011 (3)
URI1	0.233204
ZFYVE26	0.233198	3	0	Spastic paraplegia 15, autosomal recessive, 270700 (3)
SLC4A5	0.232662
FARP1	0.232601
DHX16	0.232505
POM121	0.232291
SVIL	0.231177
VARS1	0.230931			Neurodevelopmental disorder with microcephaly, seizures, and cortical atrophy, 617802 (3)
CORO2B	0.23063
CFAP44	0.230513			?Spermatogenic failure 20, 617593 (3)
STMN4	0.228501
PLXNB1	0.228075	2	0
HERC2	0.227976		1	Mental retardation, autosomal recessive 38, 615516 (3), [Skin/hair/eye pigmentation 1, blond/brown hair], 227220 (3), [Skin/hair/eye pigmentation 1, blue/nonblue eyes], 227220 (3)
FBH1	0.227655
SORBS1	0.227382
SPATA13	0.226824
MYH2	0.226534			Proximal myopathy and ophthalmoplegia, 605637 (3)
GOLGA5	0.2263
CBL	0.2258			?Juvenile myelomonocytic leukemia, 607785 (3), Noonan syndrome-like disorder with or without juvenile myelomonocytic leukemia, 613563 (3)
PHTF2	0.225325
PTMS	0.224617
STXBP3	0.223955
RNF167	0.223862
USP34	0.223465
GUCA2A	0.223176
POLR3A	0.223037	3	1	Leukodystrophy, hypomyelinating, 7, with or without oligodontia and/or hypogonadotropic hypogonadism, 607694 (3)
PFKFB2	0.222182
CREBZF	0.222071
TMEM30A	0.220848
GLRB	0.220614			Hyperekplexia 2, 614619 (3)
PHF7	0.220423	2	0
SCP2	0.219953	3	0	?Leukoencephalopathy with dystonia and motor neuropathy, 613724 (3)
FSIP2	0.219546
HIBADH	0.218991
ICE2	0.21872
USP54	0.218225
NDST4	0.217975
AP4E1	0.217826			Spastic paraplegia 51, autosomal recessive, 613744 (3), Stuttering, familial persistent, 1, 184450 (3)
DOCK5	0.217818
CTBP2	0.217428
GRIK1	0.217422
CALU	0.216423
RYR2	0.214617			Arrhythmogenic right ventricular dysplasia 2, 600996 (3), Ventricular tachycardia, catecholaminergic polymorphic, 1, 604772 (3)
GALNT18	0.214427
RPH3A	0.213674
VAV3	0.21324
PALLD	0.213208			{Pancreatic cancer, susceptibility to, 1}, 606856 (3)
NEXN	0.213178			Cardiomyopathy, dilated, 1CC, 613122 (3), Cardiomyopathy, hypertrophic, 20, 613876 (3)
FAM8A1	0.212961
WNT7B	0.212503
PCM1	0.212498	3	0
MIA2	0.212457
LRP1	0.212343	2	0	?Keratosis pilaris atrophicans, 604093 (3)
IFT88	0.211956
GOPC	0.211435
CACNA1S	0.211064			Hypokalemic periodic paralysis, type 1, 170400 (3), {Malignant hyperthermia susceptibility 5}, 601887 (3), {Thyrotoxic periodic paralysis, susceptibility to, 1}, 188580 (3)
ZNF853	0.210871
HSPA13	0.210073
SH3D19	0.209868
ACACB	0.20966
NHLRC2	0.209256
CYP17A1	0.208714			17,20-lyase deficiency, isolated, 202110 (3), 17-alpha-hydroxylase/17,20-lyase deficiency, 202110 (3)
BCLAF1	0.207314
TRIM66	0.206832
ILVBL	0.206485
RUNDC3B	0.204905
ANK3	0.203809	1	0	?Mental retardation, autosomal recessive, 37, 615493 (3)
UBAP2	0.203594
PRMT2	0.203292
MINDY3	0.20311
GALNT3	0.201685			Tumoral calcinosis, hyperphosphatemic, familial, 1, 211900 (3)
BRCA2	0.20134	3	0	Fanconi anemia, complementation group D1, 605724 (3), Wilms tumor, 194070 (3), {Breast cancer, male, susceptibility to}, 114480 (3), {Breast-ovarian cancer, familial, 2}, 612555 (3), {Glioblastoma 3}, 613029 (3), {Medulloblastoma}, 155255 (3), {Pancreatic cancer 2}, 613347 (3), {Prostate cancer}, 176807 (3)
SMG1	0.200832
BSDC1	0.200818
PSD2	0.199833
PGM5	0.199677
COL5A3	0.199669
LRFN2	0.199051	3	0
TMEM39B	0.198993	3	0
NIPBL	0.198634	1	0	Cornelia de Lange syndrome 1, 122470 (3)
DNAJC17	0.198326
MAPK8IP3	0.198266
MATK	0.198238
RCBTB1	0.19817			Retinal dystrophy with or without extraocular anomalies, 617175 (3)
DNAJC10	0.197571
NFKBIL1	0.197172			{Rheumatoid arthritis, susceptibility to}, 180300 (3)
ARMC2	0.196872
PRRX2	0.196668
TTC37	0.196599			Trichohepatoenteric syndrome 1, 222470 (3)
NOTCH4	0.19639
BTBD9	0.196332
TCF12	0.196302			Craniosynostosis 3, 615314 (3)
TLN1	0.195843
CC2D1A	0.195747	2	0	Mental retardation, autosomal recessive 3, 608443 (3)
NIN	0.195263			?Seckel syndrome 7, 614851 (3)
ANKRD17	0.194517
NOS3	0.194317			{Alzheimer disease, late-onset, susceptibility to}, 104300 (3), {Coronary artery spasm 1, susceptibility to} (3), {Hypertension, pregnancy-induced}, 189800 (3), {Hypertension, susceptibility to}, 145500 (3), {Ischemic stroke, susceptibility to}, 601367 (3), {Placental abruption} (3)
KREMEN1	0.19417			Ectodermal dysplasia 13, hair/tooth type, 617392 (3)
HTT	0.193808			Huntington disease, 143100 (3), Lopes-Maciel-Rodan syndrome, 617435 (3), {Anxiety-related personality traits}, 607834 (3), {Obsessive-compulsive disorder}, 164230 (3)
SLC35A3	0.19378			?Arthrogryposis, mental retardation, and seizures, 615553 (3)
OLFM3	0.193778
MTIF2	0.193538
GGT1	0.193085			?Glutathioninuria, 231950 (3)
RUNDC1	0.192927
UPF2	0.19292	3	0
MYBL2	0.192848
MRE11	0.192719			Ataxia-telangiectasia-like disorder 1, 604391 (3)
CNTNAP3	0.192703	2	0
ANKFN1	0.1927
GFOD2	0.192603
P4HA3	0.192594
SNRNP200	0.191957			Retinitis pigmentosa 33, 610359 (3)
PLEK	0.191881
MTOR	0.191877	2	1	Focal cortical dysplasia, type II, somatic, 607341 (3), Smith-Kingsmore syndrome, 616638 (3)
ZNF775	0.191708
CDAN1	0.191584			Dyserythropoietic anemia, congenital, type Ia, 224120 (3)
FADS3	0.191544
URB1	0.19138
FREM3	0.191281
CCNH	0.191273
B4GALNT1	0.190956			Spastic paraplegia 26, autosomal recessive, 609195 (3)
ACSS1	0.190151
FAT4	0.189384			Hennekam lymphangiectasia-lymphedema syndrome 2, 616006 (3), Van Maldergem syndrome 2, 615546 (3)
SPTAN1	0.189297			Epileptic encephalopathy, early infantile, 5, 613477 (3)
BPTF	0.189162			Neurodevelopmental disorder with dysmorphic facies and distal limb anomalies, 617755 (3)
UHRF1BP1L	0.189008
ITGB5	0.188364
ANKFY1	0.188118
ITPR1	0.187647	3	0	Gillespie syndrome, 206700 (3), Spinocerebellar ataxia 15, 606658 (3), Spinocerebellar ataxia 29, congenital nonprogressive, 117360 (3)
MACF1	0.187634
EFCAB8	0.187602
TCF3	0.187366			Agammaglobulinemia 8, autosomal dominant, 616941 (3)
RPL12	0.18685
CAD	0.186824			Epileptic encephalopathy, early infantile, 50, 616457 (3)
CSMD1	0.186271	3	0
FRY	0.186263
DNAH17	0.186249	3	0
PGBD4	0.186116
TSPOAP1	0.185525	3	0
SCUBE2	0.184865
COL25A1	0.184826			Fibrosis of extraocular muscles, congenital, 5, 616219 (3)
PTPRD	0.184768
MYH9	0.184473	2	0	Deafness, autosomal dominant 17, 603622 (3), Macrothrombocytopenia and granulocyte inclusions with or without nephritis or sensorineural hearing loss, 155100 (3)
LRRFIP1	0.184407
MGRN1	0.18428
MSH4	0.184145
GRIN2C	0.183998
AASDH	0.183579
ITFG2	0.183301
APC	0.182748			Adenoma, periampullary, somatic (3), Adenomatous polyposis coli, 175100 (3), Brain tumor-polyposis syndrome 2, 175100 (3), Colorectal cancer, somatic, 114500 (3), Desmoid disease, hereditary, 135290 (3), Gardner syndrome, 175100 (3), Gastric cancer, somatic, 613659 (3), Hepatoblastoma, somatic, 114550 (3)
ANO9	0.182572
HCFC1	0.182408		1	Mental retardation, X-linked 3 (methylmalonic acidemia and homocysteinemia, cblX type ), 309541 (3)
CFAP74	0.181556
SMARCA4	0.1814	1	0	Coffin-Siris syndrome 4, 614609 (3), {Rhabdoid tumor predisposition syndrome 2}, 613325 (3)
ZNF614	0.18136
CTNNA3	0.181237	3	0	Arrhythmogenic right ventricular dysplasia, familial, 13, 615616 (3)
MED12L	0.181104	3	1
BRWD3	0.181045		1	Mental retardation, X-linked 93, 300659 (3)
ERCC4	0.181013			?XFE progeroid syndrome, 610965 (3), Fanconi anemia, complementation group Q, 615272 (3), Xeroderma pigmentosum, group F, 278760 (3), Xeroderma pigmentosum, type F/Cockayne syndrome, 278760 (3)
CHD9	0.180613
NAXD	0.180199
ACOX2	0.179872			Bile acid synthesis defect, congenital, 6, 617308 (3)
GALNT14	0.179695	3	0
TRIO	0.179409	1	0	Mental retardation, autosomal dominant 44, 617061 (3)
MYH10	0.179407	2	0
SCN8A	0.178725	1	0	?Cognitive impairment with or without cerebellar ataxia, 614306 (3), Epileptic encephalopathy, early infantile, 13, 614558 (3), Seizures, benign familial infantile, 5, 617080 (3)
TMEM45A	0.178533
DPP3	0.178192	3	0
USP53	0.177721
SCN7A	0.177407
ZFHX4	0.177383			?Ptosis, congenital, 178300 (2)
RBBP6	0.177359
RTEL1	0.176925			Dyskeratosis congenita, autosomal dominant 4, 615190 (3), Dyskeratosis congenita, autosomal recessive 5, 615190 (3), Pulmonary fibrosis and/or bone marrow failure, telomere-related, 3, 616373 (3)
FOCAD	0.176877
TAF1	0.176422		1	Dystonia-Parkinsonism, X-linked, 314250 (3), Mental retardation, X-linked, syndromic 33, 300966 (3)
DOCK3	0.176415
STAB1	0.176349
CEP120	0.17622			Joubert syndrome 31, 617761 (3), Short-rib thoracic dysplasia 13 with or without polydactyly, 616300 (3)
PCLO	0.176207			?Pontocerebellar hypoplasia, type 3, 608027 (3)
COL9A2	0.17531			?Stickler syndrome, type V, 614284 (3), Epiphyseal dysplasia, multiple, 2, 600204 (3)
ST3GAL6	0.17519
ARHGAP35	0.175174
PALB2	0.174894			Fanconi anemia, complementation group N, 610832 (3), {Breast cancer, susceptibility to}, 114480 (3), {Pancreatic cancer, susceptibility to, 3}, 613348 (3)
RBM19	0.174528
DSG3	0.174511
HHAT	0.174361
SLC7A7	0.174246	3	0	Lysinuric protein intolerance, 222700 (3)
OSER1	0.173411
MED1	0.173401
DONSON	0.173366			Microcephaly, short stature, and limb abnormalities, 617604 (3), Microcephaly-micromelia syndrome, 251230 (3)
CSPP1	0.173209			Joubert syndrome 21, 615636 (3)
SUPT5H	0.173077
PCNX1	0.173014
KIF1B	0.172533			?Charcot-Marie-Tooth disease, type 2A1, 118210 (3), Pheochromocytoma, 171300 (3), {Neuroblastoma, susceptibility to, 1}, 256700 (3)
CHD6	0.172389
IL23R	0.17165			{Inflammatory bowel disease 17, protection against}, 612261 (3), {Psoriasis, protection against}, 605606 (3)
STARD10	0.171603
KDM2A	0.171136
SUPT6H	0.171128
CACNA1D	0.170684	2	0	Primary aldosteronism, seizures, and neurologic abnormalities, 615474 (3), Sinoatrial node dysfunction and deafness, 614896 (3)
KMT2B	0.170521			Dystonia 28, childhood-onset, 617284 (3)
GCN1	0.170437
PSME4	0.170411
ACACA	0.170251			Acetyl-CoA carboxylase deficiency, 613933 (1)
TPR	0.169773
ZSWIM8	0.169735
PTPN13	0.16954
WRAP53	0.16949			Dyskeratosis congenita, autosomal recessive 3, 613988 (3)
FLNA	0.169362			?FG syndrome 2, 300321 (3), Cardiac valvular dysplasia, X-linked, 314400 (3), Congenital short bowel syndrome, 300048 (3), Frontometaphyseal dysplasia 1, 305620 (3), Heterotopia, periventricular, 300049 (3), Intestinal pseudoobstruction, neuronal, 300048 (3), Melnick-Needles syndrome, 309350 (3), Otopalatodigital syndrome, type I, 311300 (3), Otopalatodigital syndrome, type II, 304120 (3), Termin…
BRCA1	0.16916			Fanconi anemia, complementation group S, 617883 (3), {Breast-ovarian cancer, familial, 1}, 604370 (3), {Pancreatic cancer, susceptibility to, 4}, 614320 (3)
COL23A1	0.168897
NRXN3	0.168799	1	0
ANO5	0.168779			Gnathodiaphyseal dysplasia, 166260 (3), Miyoshi muscular dystrophy 3, 613319 (3), Muscular dystrophy, limb-girdle, type 2L, 611307 (3)
COL18A1	0.168733			Knobloch syndrome, type 1, 267750 (3)
USP7	0.168601	2	1
DUS1L	0.168576
OR10Z1	0.168243
KIF1A	0.168162			Mental retardation, autosomal dominant 9, 614255 (3), Neuropathy, hereditary sensory, type IIC, 614213 (3), Spastic paraplegia 30, autosomal recessive, 610357 (3)
NAV1	0.168152
PRKDC	0.168052	3	0	Immunodeficiency 26, with or without neurologic abnormalities, 615966 (3)
ZNF521	0.167815
LIMA1	0.167815
DNPEP	0.167541
POLI	0.167497
PRRC2C	0.167217
CTNND2	0.167126	2	0
RPTOR	0.167039
ILF3	0.166963
RICTOR	0.166961
DHX9	0.166939
CFAP43	0.166856			Spermatogenic failure 19, 617592 (3)
MAST1	0.166767
DMAC2	0.166563
BSN	0.166277
CCDC82	0.166219
ADGRB3	0.166183
C2CD6	0.166084
BRD4	0.166083	3	0
ZNF790	0.165846
ZNF567	0.165755
VWCE	0.165704
ATP2B2	0.165698	2	0	{Deafness, autosomal recessive 12, modifier of}, 601386 (3)
PTPRS	0.165655
MAN1B1	0.165407			Mental retardation, autosomal recessive 15, 614202 (3)
FLNC	0.165135			Cardiomyopathy, familial hypertrophic, 26 (3), Cardiomyopathy, familial restrictive 5, 617047 (3), Myopathy, distal, 4, 614065 (3), Myopathy, myofibrillar, 5, 609524 (3)
MGA	0.165114
PLCL2	0.164965
COL5A1	0.164954			Ehlers-Danlos syndrome, classic type, 1, 130000 (3)
UPF1	0.164885
TICRR	0.16484
SCN3A	0.164789			Epilepsy, familial focal, with variable foci 4, 617935 (3), Epileptic encephalopathy, early infantile, 62, 617938 (3)
PBRM1	0.164574
SPARCL1	0.164463	2	0
PARD3B	0.164402	2	0
THOC2	0.164199			Mental retardation, X-linked 12/35, 300957 (3)
NCKAP1	0.16413	1	0
RPAP1	0.163936
RPRD2	0.163915
SMC3	0.163833	3	1	Cornelia de Lange syndrome 3, 610759 (3)
USP24	0.163804
ARFGEF1	0.163509
HCRTR1	0.163463
CCDC88A	0.163254			?PEHO syndrome-like, 617507 (3)
ATP1A3	0.16321	3	1	Alternating hemiplegia of childhood 2, 614820 (3), CAPOS syndrome, 601338 (3), Dystonia-12, 128235 (3)
SEMA4F	0.16319
SCAF8	0.163127
DCAF1	0.16283
SON	0.162774	1	0	ZTTK syndrome, 617140 (3)
CD101	0.162747
ZWILCH	0.162625	3	0
PLXNA1	0.16239
ZNF236	0.162228
TSC2	0.162175	1	0	?Focal cortical dysplasia, type II, somatic, 607341 (3), Lymphangioleiomyomatosis, somatic, 606690 (3), Tuberous sclerosis-2, 613254 (3)
AADAC	0.162151
RALGAPB	0.162096	2	0
PCOLCE	0.162047
GLI3	0.161982			Greig cephalopolysyndactyly syndrome, 175700 (3), Pallister-Hall syndrome, 146510 (3), Polydactyly, postaxial, types A1 and B, 174200 (3), Polydactyly, preaxial, type IV, 174700 (3), {Hypothalamic hamartomas, somatic}, 241800 (3)
KDM5C	0.161955	1	0	Mental retardation, X-linked, syndromic, Claes-Jensen type, 300534 (3)
SLC12A7	0.161953
NRXN2	0.161927	1	0
SBNO1	0.161926
CD163L1	0.161921
DNMT1	0.161879			Cerebellar ataxia, deafness, and narcolepsy, autosomal dominant, 604121 (3), Neuropathy, hereditary sensory, type IE, 614116 (3)
TJP1	0.161781
HECW1	0.161649
SLC44A4	0.161495			?Deafness, autosomal dominant 72, 617606 (3)
CACNA1A	0.161368	1	1	Epileptic encephalopathy, early infantile, 42, 617106 (3), Episodic ataxia, type 2, 108500 (3), Migraine, familial hemiplegic, 1, 141500 (3), Migraine, familial hemiplegic, 1, with progressive cerebellar ataxia, 141500 (3), Spinocerebellar ataxia 6, 183086 (3)
EIF4G1	0.161351	3	0	{Parkinson disease 18}, 614251 (3)
DNAJC13	0.161309
COL4A1	0.16119			?Retinal arteries, tortuosity of, 180000 (3), Angiopathy, hereditary, with nephropathy, aneurysms, and muscle cramps, 611773 (3), Brain small vessel disease with or without ocular anomalies, 607595 (3), Porencephaly 1, 175780 (3), Schizencephaly, 269160 (3), {Hemorrhage, intracerebral, susceptibility to}, 614519 (3)
ABCC10	0.161047
NFAT5	0.161015
TENM2	0.160953
RIF1	0.160952
PRR12	0.160918	1	0
HELZ	0.160836
VCPIP1	0.160831
XPO1	0.160807	3	0
LRRC7	0.160709
RAD21L1	0.160522	3	0
ENTPD6	0.160484
SPDYC	0.160477
BAZ1B	0.160284
SIPA1L1	0.160242
SBF1	0.160197	2	0	Charcot-Marie-Tooth disease, type 4B3, 615284 (3)
DHX30	0.160181		1	Neurodevelopmental disorder with severe motor impairment and absent language, 617804 (3)
DSP	0.160177			Arrhythmogenic right ventricular dysplasia 8, 607450 (3), Cardiomyopathy, dilated, with woolly hair and keratoderma, 605676 (3), Dilated cardiomyopathy with woolly hair, keratoderma, and tooth agenesis, 615821 (3), Epidermolysis bullosa, lethal acantholytic, 609638 (3), Keratosis palmoplantaris striata II, 612908 (3), Skin fragility-woolly hair syndrome, 607655 (3)
SF3B1	0.159972	3	0	Myelodysplastic syndrome, somatic, 614286 (3)
PTPRF	0.159933			?Breasts and/or nipples, aplasia or hypoplasia of, 2, 616001 (3)
RAPGEF3	0.159919
DCAF5	0.15989
GAPVD1	0.159844
CDK12	0.159722
SMARCA2	0.159684	1	1	Nicolaides-Baraitser syndrome, 601358 (3)
TRIM17	0.159684
AFAP1L1	0.15968
RASGRF1	0.159587
HIPK2	0.159451
CHST10	0.15944
EEF2	0.159087			?Spinocerebellar ataxia 26, 609306 (3)
GRIN2A	0.158949	2	0	Epilepsy, focal, with speech disorder and with or without mental retardation, 245570 (3)
TLN2	0.158931
ZMYND8	0.158879	1	0
ATP2B1	0.15885
POLR1A	0.158791			Acrofacial dysostosis, Cincinnati type, 616462 (3)
KDM5A	0.158735
DDX31	0.158731
XPO7	0.158723
FAM120A	0.158655
ZNF609	0.158328
ANK1	0.158163			Spherocytosis, type 1, 182900 (3)
MCM8	0.15816			?Premature ovarian failure 10, 612885 (3)
LRRFIP2	0.158095
ERBB4	0.158077			Amyotrophic lateral sclerosis 19, 615515 (3)
DICER1	0.158047			Goiter, multinodular 1, with or without Sertoli-Leydig cell tumors, 138800 (3), Pleuropulmonary blastoma, 601200 (3), Rhabdomyosarcoma, embryonal, 2, 180295 (3)
TET3	0.158015		1
AP2A2	0.158002
WDR87	0.15793
NUP205	0.157902			?Nephrotic syndrome, type 13, 616893 (3)
CTH	0.157845			Cystathioninuria, 219500 (3), Homocysteine, total plasma, elevated (3)
MAK	0.157781			Retinitis pigmentosa 62, 614181 (3)
CSE1L	0.157778
PPFIA1	0.157701	3	0
ADGRL1	0.157478
ARFGEF2	0.157473			Periventricular heterotopia with microcephaly, 608097 (3)
PCF11	0.157426
SP1	0.157399
USP47	0.15736
UNC13A	0.157262	3	1
FKBP15	0.157186
RBM10	0.156997			TARP syndrome, 311900 (3)
CACNA1C	0.156912	1	0	Brugada syndrome 3, 611875 (3), Timothy syndrome, 601005 (3)
CYFIP2	0.156895			Epileptic encephalopathy, early infantile, 65, 618008 (3)
IPO5	0.156875
PFKL	0.156872			Hemolytic anemia due to phosphofructokinase deficiency (1)
EIF3B	0.156871
TAF4	0.156858
ZNF592	0.156846
TNPO1	0.156841
ZFPL1	0.15677
SUPT16H	0.156723	2	1
INO80	0.156672
TNRC6C	0.156666
NSD3	0.156601			Leukemia, acute myeloid, 601626 (3)
SOS1	0.156566			?Fibromatosis, gingival, 1, 135300 (3), Noonan syndrome 4, 610733 (3)
SBDS	0.15642			Shwachman-Diamond syndrome, 260400 (3), {Aplastic anemia, susceptibility to}, 609135 (3)
MN1	0.156396			Meningioma, 607174 (3)
TRIM33	0.156305	3	0
CAND1	0.156304
RALGAPA1	0.156284
U2SURP	0.156273
ATXN2L	0.156243
NCOA1	0.156037	1	0
PIAS1	0.156019
MAGI2	0.155949			Nephrotic syndrome 15, 617609 (3)
PUM1	0.155942			Spinocerebellar ataxia 47, 617931 (3)
ZFR	0.155928
BAZ1A	0.155923
RAD54L2	0.155904
SRGAP3	0.155876	3	0
MLLT10	0.155831
IPO7	0.1558
AP2A1	0.155703
CACNA1B	0.155693	3	0	?Dystonia 23, 614860 (3)
UBTF	0.155687			Neurodegeneration, childhood-onset, with brain atrophy, 617672 (3)
MATR3	0.155668			Amyotrophic lateral sclerosis 21, 606070 (3)
CUL4B	0.155661			Mental retardation, X-linked, syndromic 15 (Cabezas type), 300354 (3)
NPIPB5	0.155601
STAG1	0.155601		1	Mental retardation, autosomal dominant 47, 617635 (3)
DNAH5	0.155517			Ciliary dyskinesia, primary, 3, with or without situs inversus, 608644 (3)
PLCD4	0.155439	3	0
FRMPD4	0.155405		1	Mental retardation, X-linked 104, 300983 (3)
SCAF4	0.155307	2	0
DIP2B	0.155118			Mental retardation, FRA12A type, 136630 (3)
FAM177A1	0.155061
SF3B3	0.155025
RBM25	0.154952
ACTN4	0.154793	3	0	Glomerulosclerosis, focal segmental, 1, 603278 (3)
NRXN1	0.154692	1	0	Pitt-Hopkins-like syndrome 2, 614325 (3), {Schizophrenia, susceptibility to, 17}, 614332 (3)
REV3L	0.154686
TLE3	0.154603
HIPK1	0.154541
COL2A1	0.15454			Achondrogenesis, type II or hypochondrogenesis, 200610 (3), Avascular necrosis of the femoral head, 608805 (3), Czech dysplasia, 609162 (3), Epiphyseal dysplasia, multiple, with myopia and deafness, 132450 (3), Kniest dysplasia, 156550 (3), Legg-Calve-Perthes disease, 150600 (3), Osteoarthritis with mild chondrodysplasia, 604864 (3), Platyspondylic skeletal dysplasia, Torrance type, 151210 (3), S…
DDB1	0.154488
FNDC3B	0.154457
TENM3	0.154451			Microphthalmia, isolated, with coloboma 9, 615145 (3)
UBE2O	0.154432
BRPF3	0.154361
TRIM28	0.15425
DOCK9	0.1542
ADGRL2	0.15416
NTRK2	0.154131		1	Epileptic encephalopathy, early infantile, 58, 617830 (3), Obesity, hyperphagia, and developmental delay, 613886 (3)
USP11	0.15404
BAG6	0.154025
XPO6	0.153822
YLPM1	0.15373
DLG3	0.153687			Mental retardation, X-linked 90, 300850 (3)
NCDN	0.153631
BAZ2A	0.15361
OGT	0.153561			Mental retardation, X-linked 106, 300997 (3)
SHANK1	0.153546	2	0
MISP	0.153545
BRD1	0.153479
UBA1	0.153476			Spinal muscular atrophy, X-linked 2, infantile, 301830 (3)
KDM2B	0.153463
PPFIA3	0.153451
RSF1	0.153418
PSMD2	0.153349
TKTL1	0.153347
EPB41L4A	0.15329
SAFB	0.153253
TM9SF2	0.153236
AMBRA1	0.153205
SLC12A5	0.153114	2	0	Epileptic encephalopathy, early infantile, 34, 616645 (3), {Epilepsy, idiopathic generalized, susceptibility to, 14}, 616685 (3)
CDC5L	0.153081
CACNA1I	0.152983	3	0
NCOA2	0.15292
CACNA1G	0.152908	3	0	Spinocerebellar ataxia 42, 616795 (3)
AGO2	0.152793	2	0
SMARCC1	0.152784
DDX42	0.152774
ARFGEF3	0.152627
KSR2	0.152601
MAU2	0.152585
POLR1E	0.152467
FAM120C	0.152387
TAS2R14	0.152381
HNRNPM	0.152368
NOS1	0.152312			Spermatogenic failure 12, 615413 (3)
ZC3H13	0.152298
DDX46	0.152289
ZNF608	0.152276
CAPN8	0.152247
PPP1R10	0.152235
PRKCB	0.152227	2	0
AFF4	0.152224			CHOPS syndrome, 616368 (3)
KIF5A	0.152187			Myoclonus, intractable, neonatal, 617235 (3), Spastic paraplegia 10, autosomal dominant, 604187 (3), {Amyotrophic lateral sclerosis, susceptibility to, 25}, 617921 (3)
MORC2	0.152185			Charcot-Marie-Tooth disease, axonal, type 2Z, 616688 (3)
NCBP1	0.152143
HIRA	0.152098
SNRK	0.152076
ZMYM3	0.151915
ATP10D	0.151876
AQR	0.151874
TNIK	0.151845			Mental retardation, autosomal recessive 54, 617028 (3)
FAM168B	0.151762
IGF2BP3	0.151734
ACTN1	0.151634			Bleeding disorder, platelet-type, 15, 615193 (3)
COPA	0.151616			{Autoimmune interstitial lung, joint, and kidney disease}, 616414 (3)
WAPL	0.151499
BCL9L	0.151493
SMARCAD1	0.151489			Adermatoglyphia, 136000 (3), Basan syndrome, 129200 (3)
DENND5B	0.151454
PLEKHA5	0.151442
ARHGEF12	0.151429
MAP3K1	0.151409			46XY sex reversal 6, 613762 (3)
MINK1	0.151399
EIF4G2	0.151341
RLF	0.15134
MAD1L1	0.151339			Lymphoma, somatic (3), Prostate cancer, somatic, 176807 (3)
MAP3K12	0.151302
WDR7	0.151296
TOP1	0.15117			DNA topoisomerase I, camptothecin-resistant (3)
WDR33	0.151146
PIK3CB	0.151145
ZNF148	0.151048			Global developmental delay, absent or hypoplastic corpus callosum, and dysmorphic facies, 617260 (3)
PIK3CA	0.151018			Breast cancer, somatic, 114480 (3), CLOVE syndrome, somatic, 612918 (3), Colorectal cancer, somatic, 114500 (3), Cowden syndrome 5, 615108 (3), Gastric cancer, somatic, 613659 (3), Hepatocellular carcinoma, somatic, 114550 (3), Keratosis, seborrheic, somatic, 182000 (3), Megalencephaly-capillary malformation-polymicrogyria syndrome, somatic, 602501 (3), Nevus, epidermal, somatic, 162900 (3), Nons…
SYMPK	0.151007
COL11A1	0.150925			Fibrochondrogenesis 1, 228520 (3), Marshall syndrome, 154780 (3), Stickler syndrome, type II, 604841 (3), {Lumbar disc herniation, susceptibility to}, 603932 (3)
TLE4	0.150909
EPHA7	0.15088
RFX3	0.150863	1	0
VCP	0.150827			Amyotrophic lateral sclerosis 14, with or without frontotemporal dementia, 613954 (3), Charcot-Marie-Tooth disease, type 2Y, 616687 (3), Inclusion body myopathy with early-onset Paget disease and frontotemporal dementia 1, 167320 (3)
ECM2	0.150696
GRK2	0.150621
ANKRD52	0.150521
RC3H2	0.150515
CSDE1	0.150465	1	0
SLC22A7	0.150414
GLG1	0.150366
ATP9A	0.15036
CHERP	0.150318
ZNF638	0.150302
SALL4	0.150223			Duane-radial ray syndrome, 607323 (3), IVIC syndrome, 147750 (3)
PRRC2B	0.150188
PACS1	0.150114	1	0	Schuurs-Hoeijmakers syndrome, 615009 (3)
CELSR2	0.150103
SOBP	0.150099			Mental retardation, anterior maxillary protrusion, and strabismus, 613671 (3)
AGPS	0.150071			Rhizomelic chondrodysplasia punctata, type 3, 600121 (3)
NAV2	0.150041	2	0
RBM26	0.150036
CTR9	0.149975
PSMD1	0.14986
ROCK1	0.149849
MAP3K4	0.149842
ABCA2	0.149805
PINK1	0.149793			Parkinson disease 6, early onset, 605909 (3)
FGFR1	0.149783	2	0	Encephalocraniocutaneous lipomatosis, 613001 (3), Hartsfield syndrome, 615465 (3), Hypogonadotropic hypogonadism 2 with or without anosmia, 147950 (3), Jackson-Weiss syndrome, 123150 (3), Osteoglophonic dysplasia, 166250 (3), Pfeiffer syndrome, 101600 (3), Trigonocephaly 1, 190440 (3)
MED14	0.149727
GRIK3	0.1497	3	0
GRM5	0.149696	3	0
ANKS1B	0.149693	3	1
CUL2	0.149678
UBR2	0.149669
HDAC5	0.149657
PPRC1	0.149628
RRM1	0.149559
RABGAP1	0.149512
ARID4A	0.149505
CUX1	0.149494	2	0
CMIP	0.149456	3	0
GRIA1	0.14944	2	0
AFF3	0.14943
PAXIP1	0.149426
ZNF777	0.149376
MLLT6	0.149374
CARM1	0.149321
ARHGEF2	0.149314			?Neurodevelopmental disorder with midbrain and hindbrain malformations, 617523 (3)
PRPF3	0.149287			Retinitis pigmentosa 18, 601414 (3)
ADAM33	0.149256
RBM33	0.149201
PABPC4	0.149192
PITPNM2	0.149181
DMXL1	0.14915
UBE4B	0.149148
TENM1	0.149087
RAPGEF6	0.149069
TYW5	0.149016
USP32	0.148991
INTS3	0.148965
AGO4	0.148915	2	0
PDS5B	0.148846
KPNB1	0.148813
SLC4A8	0.148811
TCERG1	0.148663
PHC3	0.14862
GTF3C1	0.148616
EIF4G3	0.14861
FANCE	0.148579			Fanconi anemia, complementation group E, 600901 (3)
CAMTA1	0.148562			Cerebellar ataxia, nonprogressive, with mental retardation, 614756 (3)
TRIM9	0.148526
DAGLA	0.148514	3	0
CUL1	0.148484
TRPS1	0.148469			Trichorhinophalangeal syndrome, type I, 190350 (3), Trichorhinophalangeal syndrome, type III, 190351 (3)
FRMD4A	0.148393			?Corpus callosum, agenesis of, with facial anomalies and cerebellar ataxia, 616819 (3)
ARID4B	0.148392
POLA1	0.148354			Pigmentary disorder, reticulate, with systemic manifestations, X-linked, 301220 (3)
TEX10	0.14833
HDAC4	0.148305	3	1
ATP2C1	0.148299			Hailey-Hailey disease, 169600 (3)
ZNF629	0.148262
CCAR1	0.148258
MARK2	0.148248
EPC1	0.14823
HNRNPK	0.14821			Au-Kline syndrome, 616580 (3)
AFDN	0.148181
PAN3	0.148142
JADE3	0.148083
RBM14	0.148008
ATP2A2	0.147994			Acrokeratosis verruciformis, 101900 (3), Darier disease, 124200 (3)
SOX6	0.147993		1
DDX5	0.14798
HMCN2	0.14795
EIF3A	0.147947
HSP90AB1	0.14786
GGA1	0.147845
DDX17	0.147832
UBE3C	0.14782	2	0
FUBP1	0.147794
DNM2	0.147712			Centronuclear myopathy 1, 160150 (3), Charcot-Marie-Tooth disease, axonal type 2M, 606482 (3), Charcot-Marie-Tooth disease, dominant intermediate B, 606482 (3), Lethal congenital contracture syndrome 5, 615368 (3)
PEX11B	0.147707			?Peroxisome biogenesis disorder 14B, 614920 (3)
ZNF423	0.147549			Joubert syndrome 19, 614844 (3), Nephronophthisis 14, 614844 (3)
DIDO1	0.147525
ANAPC2	0.147515
CLCN4	0.147512	3	1	Mental retardation, X-linked 49/15, 300114 (3)
SMCHD1	0.147499			Bosma arhinia microphthalmia syndrome, 603457 (3), Fascioscapulohumeral muscular dystrophy 2, digenic, 158901 (3)
DLGAP3	0.14742	3	0
ATF4	0.147403
KIF5C	0.147395	3	1	Cortical dysplasia, complex, with other brain malformations 2, 615282 (3)
PRICKLE2	0.147381	2	0
SIPA1L2	0.147378
DLGAP1	0.14735	2	0
MYBL1	0.147341
SMARCA1	0.147329
HNRNPUL1	0.147301
TSPAN17	0.147284	3	0
EIF4ENIF1	0.147201
STAT3	0.147194			Autoimmune disease, multisystem, infantile-onset, 1, 615952 (3), Hyper-IgE recurrent infection syndrome, 147060 (3)
GRIA3	0.147177			Mental retardation, X-linked 94, 300699 (3)
PRMT5	0.147169
ANKRD50	0.147161
NF2	0.14716			Meningioma, NF2-related, somatic, 607174 (3), Neurofibromatosis, type 2, 101000 (3), Schwannomatosis, somatic, 162091 (3)
PTPRM	0.147146
YTHDC2	0.147142	3	0
TSC1	0.147124	1	0	Focal cortical dysplasia, type II, somatic, 607341 (3), Lymphangioleiomyomatosis, 606690 (3), Tuberous sclerosis-1, 191100 (3)
DPYSL5	0.147079
OSBPL6	0.147062
ARHGAP32	0.147031	3	0
ATP2B3	0.147016			?Spinocerebellar ataxia, X-linked 1, 302500 (3)
HOOK3	0.146963
FXR1	0.146943
RBM6	0.146942
RORB	0.146927	1	0
TULP4	0.146916
GABBR2	0.146867	3	1	Epileptic encephalopathy, early infantile, 59, 617904 (3), Neurodevelopmental disorder with poor language and loss of hand skills, 617903 (3), {Nicotine dependence, protection against}, 188890 (3), {Nicotine dependence, susceptibility to}, 188890 (3)
XKR4	0.146827
MTA1	0.146815
GRID2	0.146814	3	0	Spinocerebellar ataxia, autosomal recessive 18, 616204 (3)
UBN1	0.146684
NR4A2	0.14668	1	0
HSPA8	0.146673
SPRED2	0.146623
TRIM24	0.146614
GRID1	0.146612	2	0
TNRC6A	0.146608
CBLL1	0.146586
HDLBP	0.146579	1	0
TEK	0.146558	1	0	Glaucoma 3, primary congenital, E, 617272 (3), Venous malformations, multiple cutaneous and mucosal, 600195 (3)
SOX9	0.146543			Acampomelic campomelic dysplasia, 114290 (3), Campomelic dysplasia with autosomal sex reversal, 114290 (3), Campomelic dysplasia, 114290 (3)
XPR1	0.146537			Basal ganglia calcification, idiopathic, 6, 616413 (3)
PROX1	0.146537
OOSP2	0.146525
CYLD	0.146521			Brooke-Spiegler syndrome, 605041 (3), Cylindromatosis, familial, 132700 (3), Trichoepithelioma, multiple familial, 1, 601606 (3)
NLGN2	0.146503	1	0
ZBTB4	0.146411
OCRL	0.146409		1	Dent disease 2, 300555 (3), Lowe syndrome, 309000 (3)
RBM5	0.146386
PREX1	0.14637	2	0
ZMYM4	0.146352
TFCP2L1	0.146336
EPHA4	0.146305
CAMSAP3	0.14627
WNK1	0.146254			Neuropathy, hereditary sensory and autonomic, type II, 201300 (3), Pseudohypoaldosteronism, type IIC, 614492 (3)
EIF3D	0.146221
NTRK3	0.146159	3	0
PTBP1	0.146113
ASAP1	0.146087
IQGAP1	0.146078
C15orf62	0.146066	3	0
DAZAP1	0.146057
ZBTB45	0.146056
THRAP3	0.14603
ZNF217	0.14599
SCML2	0.14597
EXOC8	0.145961
EZH2	0.145926			Weaver syndrome, 277590 (3)
PPP1R13B	0.145845
TRPC5	0.145831
PHF20L1	0.145796
CUL5	0.145789
SAMD4B	0.145789
EIF4B	0.145704
SFPQ	0.145698
RBM15B	0.145669
GGNBP2	0.145666	2	0
CAMSAP2	0.145659
STXBP5	0.145641	2	0
RARB	0.145618			Microphthalmia, syndromic 12, 615524 (3)
TM9SF3	0.145614
U2AF2	0.145608
KLHL15	0.145582			Mental retardation, X-linked 103, 300982 (3)
RASA1	0.145567			Basal cell carcinoma, somatic, 605462 (3), Capillary malformation-arteriovenous malformation, 608354 (3), Parkes Weber syndrome, 608355 (3)
SECTM1	0.145561
DUOX1	0.145561
ASIC2	0.145546
HCN1	0.145524		1	Epileptic encephalopathy, early infantile, 24, 615871 (3)
RANBP3	0.145449
ADAM10	0.145437			Reticulate acropigmentation of Kitamura, 615537 (3), {Alzheimer disease 18, susceptibility to}, 615590 (3)
EP400	0.145428	2	0
SETDB1	0.145418	3	0
NDST1	0.145416			Mental retardation, autosomal recessive 46, 616116 (3)
GRIN2D	0.145403			Epileptic encephalopathy, early infantile, 46, 617162 (3)
GPHN	0.145335	2	0	Molybdenum cofactor deficiency C, 615501 (3)
COL5A2	0.145315			Ehlers-Danlos syndrome, classic type, 2, 130010 (3)
JAK1	0.145273
AP1G1	0.145269
NISCH	0.145264
EWSR1	0.145154			Ewing sarcoma, 612219 (3), Neuroepithelioma, 612219 (3)
RBM17	0.145133
RXRA	0.145067
SIN3B	0.145044
ASAP2	0.145039	2	0
JMJD1C	0.145019	3	0
ATN1	0.144999			Dentatorubro-pallidoluysian atrophy, 125370 (3)
DNAJC14	0.14498
SF3B2	0.144976
PIK3CD	0.144945			Immunodeficiency 14, 615513 (3)
BTK	0.144939			Agammaglobulinemia and isolated hormone deficiency, 307200 (3), Agammaglobulinemia, X-linked 1, 300755 (3)
ZC3H7A	0.144936
CUX2	0.144924	3	1
IPO9	0.144913
PPP4R3A	0.144908
PLA1A	0.144869
TMEM63B	0.144865
BRAF	0.144805	1	0	Adenocarcinoma of lung, somatic, 211980 (3), Cardiofaciocutaneous syndrome, 115150 (3), Colorectal cancer, somatic (3), LEOPARD syndrome 3, 613707 (3), Melanoma, malignant, somatic (3), Nonsmall cell lung cancer, somatic (3), Noonan syndrome 7, 613706 (3)
ZBTB21	0.144753
RANBP9	0.144711
PIAS4	0.144702
CELSR3	0.144667
GRAMD4	0.144653
ARCN1	0.144647			Short stature, rhizomelic, with microcephaly, micrognathia, and developmental delay, 617164 (3)
NUP153	0.144569
PTCH1	0.144558			Basal cell carcinoma, somatic, 605462 (3), Basal cell nevus syndrome, 109400 (3), Holoprosencephaly 7, 610828 (3)
ATRN	0.144542
MEN1	0.144525			Adrenal adenoma, somatic (3), Angiofibroma, somatic (3), Carcinoid tumor of lung (3), Lipoma, somatic (3), Multiple endocrine neoplasia 1, 131100 (3), Parathyroid adenoma, somatic (3)
MAP3K2	0.144512
PKN2	0.144507
IGF2R	0.144497			Hepatocellular carcinoma, somatic, 114550 (3)
YTHDF2	0.144487
KDM4B	0.144462	3	0
GDI1	0.144442			Mental retardation, X-linked 41, 300849 (3)
FNDC3A	0.144403
SP3	0.144397
PTPRA	0.144357
LINGO1	0.144347
TLK1	0.144338
RET	0.144323			Central hypoventilation syndrome, congenital, 209880 (3), Medullary thyroid carcinoma, 155240 (3), Multiple endocrine neoplasia IIA, 171400 (3), Multiple endocrine neoplasia IIB, 162300 (3), Pheochromocytoma, 171300 (3), {Hirschsprung disease, protection against}, 142623 (3), {Hirschsprung disease, susceptibility to, 1}, 142623 (3)
TRAPPC8	0.144312
MNT	0.14431	3	0
MYRF	0.144287
TNPO2	0.144285
HDAC2	0.144275
CFAP410	0.144256
SLC9A6	0.144247	1	0	Mental retardation, X-linked syndromic, Christianson type, 300243 (3)
ZBTB38	0.144227
PHEX	0.14421			Hypophosphatemic rickets, X-linked dominant, 307800 (3)
PAXBP1	0.144201
USP48	0.144173
KCNMA1	0.144166	3	0	?Cerebellar atrophy, developmental delay, and seizures, 617643 (3), Paroxysmal nonkinesigenic dyskinesia, 3, with or without generalized epilepsy, 609446 (3)
ATAD2	0.144073
ADCY1	0.14406			?Deafness, autosomal recessive 44, 610154 (3)
PIK3R1	0.144057			?Agammaglobulinemia 7, autosomal recessive, 615214 (3), Immunodeficiency 36, 616005 (3), SHORT syndrome, 269880 (3)
SELENON	0.144034			Muscular dystrophy, rigid spine, 1, 602771 (3), Myopathy, congenital, with fiber-type disproportion, 255310 (3)
ARHGEF7	0.144005
PELP1	0.143998
PTPN6	0.14399
GSE1	0.14398
FERMT2	0.143975
DHX57	0.143929
BNIP1	0.143923
MAP3K7	0.143878			Cardiospondylocarpofacial syndrome, 157800 (3), Frontometaphyseal dysplasia 2, 617137 (3)
DAPK1	0.143874
INTS6L	0.143865
CREBRF	0.143863
CDC73	0.143842			Hyperparathyroidism, familial primary, 145000 (3), Hyperparathyroidism-jaw tumor syndrome, 145001 (3), Parathyroid adenoma with cystic changes, 145001 (3), Parathyroid carcinoma, 608266 (3)
TRIM71	0.143841
OR51A2	0.143838
ADGRL3	0.143835
SALL1	0.143796			Townes-Brocks branchiootorenal-like syndrome, 107480 (3), Townes-Brocks syndrome 1, 107480 (3)
SMU1	0.143776
PDX1	0.143764			Lacticacidemia due to PDX1 deficiency, 245349 (3), MODY, type IV, 606392 (3), Pancreatic agenesis 1, 260370 (3), {Diabetes mellitus, type II, susceptibility to}, 125853 (3)
AAK1	0.143755
SEC24B	0.143741
RPL4	0.143726
NOVA1	0.143699
EPC2	0.143679	3	0
MAPK8IP2	0.143664
RAPGEF1	0.143607
RBM15	0.143599			Megakaryoblastic leukemia, acute (2)
NPEPPS	0.143597
NAA25	0.143592
ADCY2	0.143576
RNF40	0.14356
INTS10	0.143543
PTPRT	0.143528	3	0
CCM2L	0.143501
PSMC2	0.143499
RBM27	0.143484	2	0
ISY1	0.143454
SLTM	0.143437
COL12A1	0.143403			?Ullrich congenital muscular dystrophy 2, 616470 (3), Bethlem myopathy 2, 616471 (3)
ZBTB16	0.143399	3	0	Leukemia, acute promyelocytic, PL2F/RARA type (3), Skeletal defects, genital hypoplasia, and mental retardation, 612447 (3)
ZER1	0.143356
EBF2	0.143322
XRCC6	0.143302	3	0
IPO13	0.143277
JAG1	0.14321			?Deafness, congenital heart defects, and posterior embryotoxon, 617992 (3), Alagille syndrome 1, 118450 (3), Tetralogy of Fallot, 187500 (3)
CCT3	0.143209
PCIF1	0.143176
ADCY5	0.143158	3	0	Dyskinesia, familial, with facial myokymia, 606703 (3)
WTAP	0.143142
EIF4A1	0.143105
PDZD8	0.143102
SRRM1	0.143092
PATZ1	0.143051
FBXO42	0.143039
CACNA2D2	0.143003
FZR1	0.14299
TEAD1	0.142989			Sveinsson chorioretinal atrophy, 108985 (3)
NCOA6	0.142985
MDM4	0.142983
WDR5	0.142975
PCDH1	0.142969
PPP2R5E	0.142934
NCL	0.14292
LARP1	0.142903
KCNH3	0.142898
DNAJC6	0.142894			Parkinson disease 19a, juvenile-onset, 615528 (3), Parkinson disease 19b, early-onset, 615528 (3)
ARHGEF6	0.142892			?Mental retardation, X-linked 46, 300436 (3)
NEURL4	0.142873
API5	0.142832
UBP1	0.142805
PCNX3	0.142799
WBP11	0.142782
PTPN11	0.142767	1	0	LEOPARD syndrome 1, 151100 (3), Leukemia, juvenile myelomonocytic, somatic, 607785 (3), Metachondromatosis, 156250 (3), Noonan syndrome 1, 163950 (3)
PARP6	0.142709
RTF1	0.142657
TET1	0.142643
PLXNA4	0.142642	2	0
WDR48	0.142635
MMP21	0.142571			Heterotaxy, visceral, 7, autosomal, 616749 (3)
TAF3	0.142519
ATAD2B	0.14242
PRICKLE1	0.142413	2	0	Epilepsy, progressive myoclonic 1B, 612437 (3)
TGFB2	0.142412			Loeys-Dietz syndrome 4, 614816 (3)
TMEM132D	0.142395
PPP2R5D	0.142391	1	0	Mental retardation, autosomal dominant 35, 616355 (3)
KAT7	0.142371
USP3	0.142359
CASKIN1	0.142358
NKRF	0.142353
PCDHA13	0.142344	3	0
MBTD1	0.142324
SHOC2	0.142321			Noonan-like syndrome with loose anagen hair, 607721 (3)
HNRNPH1	0.14232
PIP4K2B	0.142315
CBX2	0.142303			?46XY sex reversal 5, 613080 (3)
MLLT3	0.142275
CACNA2D1	0.142264	3	0
CUL4A	0.142261
LIN54	0.142247
CPSF6	0.142177
COPS2	0.142135
NFKB1	0.142132			Immunodeficiency, common variable, 12, 616576 (3)
MYH13	0.142129
BTBD11	0.142128
RCOR1	0.142119
SF3A3	0.142085
PHF6	0.142079			Borjeson-Forssman-Lehmann syndrome, 301900 (3)
ARHGAP44	0.142062
NOL4	0.142051
KCNB1	0.142045	1	0	Epileptic encephalopathy, early infantile, 26, 616056 (3)
SLMAP	0.142003
PSMD11	0.142
EFEMP1	0.141998			Doyne honeycomb degeneration of retina, 126600 (3)
GSK3A	0.141985
MTM1	0.141982			Myotubular myopathy, X-linked, 310400 (3)
BMPR2	0.141973			Pulmonary hypertension, familial primary, 1, with or without HHT, 178600 (3), Pulmonary hypertension, primary, fenfluramine or dexfenfluramine-associated, 178600 (3), Pulmonary venoocclusive disease 1, 265450 (3)
NCSTN	0.141953			Acne inversa, familial, 1, 142690 (3)
IRF6	0.141946			Popliteal pterygium syndrome 1, 119500 (3), van der Woude syndrome, 119300 (3), {Orofacial cleft 6}, 608864 (3)
GTPBP4	0.141903
ZC3H12B	0.141895
PHLPP1	0.141894
SFSWAP	0.141883
IL1RAPL1	0.14187	3	0	Mental retardation, X-linked 21/34, 300143 (3)
ZNF827	0.141862	3	0
SYNCRIP	0.141855	3	0
KCNB2	0.14183
IARS2	0.141787			?Cataracts, growth hormone deficiency, sensory neuropathy, sensorineural hearing loss, and skeletal dysplasia, 616007 (3)
PAFAH1B1	0.141779			Lissencephaly 1, 607432 (3), Subcortical laminar heterotopia, 607432 (3)
BRD2	0.141761
RNF17	0.141757
CECR2	0.14175	3	0
TPX2	0.141713
TIAL1	0.141681
TRIM2	0.141668			Charcot-Marie-Tooth disease, type 2R, 615490 (3)
TAOK1	0.141651	1	0
CFLAR	0.141642
FBXL19	0.141632
CDC42BPA	0.141626
PPP3CA	0.141559			Epileptic encephalopathy, infantile or early childhood, 1, 617711 (3)
ASTN2	0.141555	2	0
HNRNPR	0.141529
DYRK2	0.141496
MECOM	0.141471			Radioulnar synostosis with amegakaryocytic thrombocytopenia 2, 616738 (3)
IKZF1	0.141429			Immunodeficiency, common variable, 13, 616873 (3)
PDE4D	0.141376			Acrodysostosis 2, with or without hormone resistance, 614613 (3), {Stroke, susceptibility to, 1}, 606799 (3)
STRBP	0.141371
GRM4	0.141364
ATP13A1	0.141309
NLK	0.141301
PRKD2	0.141295	2	0
ACIN1	0.141284
XPOT	0.141284
EIF4A3	0.141279			Robin sequence with cleft mandible and limb anomalies, 268305 (3)
KLHL2	0.141278
PPARD	0.141269
NPLOC4	0.141249
PPP3CB	0.141228
TP53BP1	0.141218
MKLN1	0.141211
UBXN7	0.141188
PTK2	0.141182
FGD1	0.141178			Aarskog-Scott syndrome, 305400 (3), Mental retardation, X-linked syndromic 16, 305400 (3)
FAN1	0.141165	3	0	Interstitial nephritis, karyomegalic, 614817 (3)
TDRD1	0.141163
IGSF1	0.141161			Hypothyroidism, central, and testicular enlargement, 300888 (3)
RUSC2	0.141125			Mental retardation, autosomal recessive 61, 617773 (3)
PAK5	0.141097
RUVBL2	0.141063
STIP1	0.14106
SLC17A7	0.141051
CELF1	0.141051
PRPF19	0.141034
NRBP1	0.140991
KLHDC3	0.140991
GABBR1	0.140983
LGI1	0.140979			Epilepsy, familial temporal lobe, 1, 600512 (3)
FAM135B	0.140961
SLC8A1	0.140955
HIVEP1	0.140947
PRKCE	0.140934
LUC7L3	0.140899
MAOB	0.14087	3	0
CLCN3	0.140864
ERCC6L	0.140819
R3HDM2	0.140812
DENND4B	0.140802
MSN	0.140783			Immunodeficiency 50, 300988 (3)
BICRAL	0.140778
PRMT1	0.140756
DPF2	0.140751			Coffin-Siris syndrome 7, 618027 (3)
EPS15L1	0.140711
RBM22	0.14071
AP2B1	0.140699
SUZ12	0.140694
XPO5	0.140677
TAF5L	0.14067
NFKB2	0.140651			Immunodeficiency, common variable, 10, 615577 (3)
MTMR3	0.140624
GRM7	0.140541	3	0
LYN	0.140504
PITPNM3	0.140502			Cone-rod dystrophy 5, 600977 (3)
SPOP	0.140488
ABCD1	0.140487			Adrenoleukodystrophy, 300100 (3), Adrenomyeloneuropathy, adult, 300100 (3)
WWP1	0.140477	3	0
SLC8A2	0.140477
PPP1R16B	0.140428
SCAF11	0.140422
PAX6	0.140372		1	?Coloboma of optic nerve, 120430 (3), ?Coloboma, ocular, 120200 (3), ?Morning glory disc anomaly, 120430 (3), Aniridia, 106210 (3), Anterior segment dysgenesis 5, multiple subtypes, 604229 (3), Cataract with late-onset corneal dystrophy, 106210 (3), Foveal hypoplasia 1, 136520 (3), Keratitis, 148190 (3), Optic nerve hypoplasia, 165550 (3)
ACTR3	0.140369
LRRC4	0.140356	3	0
OGDH	0.140331			Alpha-ketoglutarate dehydrogenase deficiency, 203740 (1)
RBBP5	0.140321
SCARA3	0.140318
ZNF219	0.14031
PSMC1	0.140309
BMT2	0.140294
AGAP1	0.140278	3	0
TLE1	0.140267
PPARGC1A	0.140263
GNB1	0.140258			Leukemia, acute lymphoblastic, somatic, 613065 (3), Mental retardation, autosomal dominant 42, 616973 (3)
KPNA4	0.140211
ARHGEF17	0.140163
PSMD4	0.140144
KBTBD2	0.140116
GIT1	0.140113
NCAM1	0.140065
ZNF618	0.140062
AGO3	0.140048	3	0
MDM2	0.140027			{Accelerated tumor formation, susceptibility to}, 614401 (3)
JADE1	0.13996
MEPCE	0.139951
CSNK1E	0.139928	3	0
L3MBTL3	0.139925
RB1	0.139852			Bladder cancer, somatic, 109800 (3), Osteosarcoma, somatic, 259500 (3), Retinoblastoma, 180200 (3), Retinoblastoma, trilateral, 180200 (3), Small cell cancer of the lung, somatic, 182280 (3)
FGFR2	0.139829			Antley-Bixler syndrome without genital anomalies or disordered steroidogenesis, 207410 (3), Apert syndrome, 101200 (3), Beare-Stevenson cutis gyrata syndrome, 123790 (3), Bent bone dysplasia syndrome, 614592 (3), Craniofacial-skeletal-dermatologic dysplasia, 101600 (3), Craniosynostosis, nonspecific (3), Crouzon syndrome, 123500 (3), Gastric cancer, somatic, 613659 (3), Jackson-Weiss syndrome, 12…
PLK2	0.139824
CLUH	0.139804
CFAP45	0.139794
AHCTF1	0.139779
NFATC2	0.139757
ZNF512B	0.139738
PTPN12	0.139704			Colon cancer, somatic, 114500 (3)
METAP1D	0.139674
JAKMIP2	0.139671
EPHB1	0.139669
ARHGEF11	0.139648
CEP170	0.139647
SP2	0.139646
SAFB2	0.139646
HMGCR	0.139632			[Low density lipoprotein cholesterol level QTL 3] (3), [Statins, attenuated cholesterol lowering by] (3)
NEDD4L	0.139628			Periventricular nodular heterotopia 7, 617201 (3)
ATF7IP	0.139621
GRIK2	0.139611	2	0	Mental retardation, autosomal recessive, 6, 611092 (3)
ZSWIM6	0.139571		1	Acromelic frontonasal dysostosis, 603671 (3), Neurodevelopmental disorder with movement abnormalities, abnormal gait, and autistic features, 617865 (3)
NFIA	0.139567	3	0	Brain malformations with or without urinary tract defects, 613735 (3)
CELF5	0.139561
POLRMT	0.13955
CBLB	0.139544
SERPINC1	0.139543			Thrombophilia due to antithrombin III deficiency, 613118 (3)
ISY1-RAB43	0.139512
SGIP1	0.139509
GREB1L	0.139505			Renal hypodysplasia/aplasia 3, 617805 (3)
CCDC171	0.139486
TRERF1	0.139478
MAOA	0.139469	3	0	Brunner syndrome, 300615 (3), {Antisocial behavior}, 300615 (3)
PRPF40B	0.139459
GON4L	0.139449
NRF1	0.139444
STAT1	0.13943			Immunodeficiency 31A, mycobacteriosis, autosomal dominant, 614892 (3), Immunodeficiency 31B, mycobacterial and viral infections, autosomal recessive, 613796 (3), Immunodeficiency 31C, autosomal dominant, 614162 (3)
ZDHHC5	0.139428
AVPR1A	0.139403	2	0
CDK19	0.139392
DLL1	0.139386	3	1
DKC1	0.139382			Dyskeratosis congenita, X-linked, 305000 (3)
DCAF8	0.139381			?Giant axonal neuropathy 2, autosomal dominant, 610100 (3)
MAGED1	0.139381
DCLK1	0.139378
C3	0.139376			C3 deficiency, 613779 (3), {Hemolytic uremic syndrome, atypical, susceptibility to, 5}, 612925 (3), {Macular degeneration, age-related, 9}, 611378 (3)
SPINK5	0.139374			Netherton syndrome, 256500 (3)
SLC25A30	0.139367
TRAPPC10	0.139334
PAPOLA	0.139324
SLC30A1	0.139315
TBX5	0.139304			Holt-Oram syndrome, 142900 (3)
NR2E1	0.139299
ZBTB2	0.139283
ZMIZ2	0.139263
SEC24C	0.139259
PTBP2	0.139255	3	0
HNRNPA1	0.139239			?Inclusion body myopathy with early-onset Paget disease without frontotemporal dementia 3, 615424 (3), Amyotrophic lateral sclerosis 20, 615426 (3)
FLT1	0.139215
ITCH	0.139206			Autoimmune disease, multisystem, with facial dysmorphism, 613385 (3)
CDH11	0.13918	3	0	Elsahy-Waters syndrome, 211380 (3)
MED15	0.139172
AP1B1	0.139163
F8	0.13914			Hemophilia A, 306700 (3)
PTPRC	0.139137	3	0	Severe combined immunodeficiency, T cell-negative, B-cell/natural killer-cell positive, 608971 (3), {Hepatitis C virus, susceptibility to}, 609532 (3)
USP8	0.139108			Pituitary adenoma 4, ACTH-secreting, somatic, 219090 (3)
UNC5A	0.139084
GTF3C2	0.139078
ZFX	0.139072
RNF220	0.139044
BCR	0.139036			Leukemia, acute lymphocytic, somatic, 613065 (3), Leukemia, chronic myeloid, somatic, 608232 (3)
NUP85	0.139029
ZNF770	0.139024
MTPAP	0.139016			?Spastic ataxia 4, autosomal recessive, 613672 (3)
RALGPS1	0.139005
CACTIN	0.138994
CACNG3	0.138972
PLXNC1	0.138963
RAPH1	0.138961
USP37	0.138942
HDAC9	0.13894
TOPORS	0.138935			Retinitis pigmentosa 31, 609923 (3)
MAT2A	0.138927
EEF1G	0.138926
ACVR1B	0.138921			Pancreatic cancer, somatic (3)
KANSL3	0.138881
LAS1L	0.138875	3	0	Wilson-Turner syndrome, 309585 (3)
VCAN	0.138872			Wagner syndrome 1, 143200 (3)
STAT5A	0.138835
UHRF2	0.138817
GSPT1	0.138796
SOCS7	0.138793
CTIF	0.138786
MSL1	0.138706
CSNK1G1	0.138701	3	0
HERC4	0.138684
ING3	0.138651
ZNF532	0.138648
EVI5L	0.138637
RUVBL1	0.138617
KIF13A	0.138605
ZBTB44	0.138581
ZRANB2	0.138574
NAP1L1	0.138552
FBXO38	0.138539			Neuronopathy, distal hereditary motor, type IID, 615575 (3)
OLFM1	0.138538
RC3H1	0.138524
MAPKAP1	0.138504
AFF2	0.138503	1	0	Mental retardation, X-linked, FRAXE type, 309548 (3)
VEZF1	0.138503	1	0
KIF2A	0.13849			Cortical dysplasia, complex, with other brain malformations 3, 615411 (3)
KCNH4	0.138488
FBXW2	0.138483
DLL4	0.138466			Adams-Oliver syndrome 6, 616589 (3)
MBTPS2	0.138455			?Olmsted syndrome, X-linked, 300918 (3), IFAP syndrome with or without BRESHECK syndrome, 308205 (3), Keratosis follicularis spinulosa decalvans, X-linked, 308800 (3)
AKT3	0.13844			Megalencephaly-polymicrogyria-polydactyly-hydrocephalus syndrome 2, 615937 (3)
HOMER1	0.138434	3	0
HNRNPL	0.138428
KIF5B	0.138427
CAMTA2	0.138407
CYTH1	0.138374
PHF23	0.138373
SOCS6	0.138366
ETV5	0.138361
ZNF131	0.138361
NCOA5	0.138342
TRAF2	0.138306
PRKG1	0.138297			Aortic aneurysm, familial thoracic 8, 615436 (3)
MEIS1	0.138275
MFN2	0.138275			Charcot-Marie-Tooth disease, axonal, type 2A2A, 609260 (3), Charcot-Marie-Tooth disease, axonal, type 2A2B, 617087 (3), Hereditary motor and sensory neuropathy VIA, 601152 (3)
DACH1	0.138259
PDE10A	0.138256			Dyskinesia, limb and orofacial, infantile-onset, 616921 (3), Striatal degeneration, autosomal dominant, 616922 (3)
ARNT2	0.138212	3	0	?Webb-Dattani syndrome, 615926 (3)
HCFC2	0.138196
ZNF800	0.138188
TCP1	0.138185
PSME3	0.138176
GRHL2	0.138175			Corneal dystrophy, posterior polymorphous, 4, 618031 (3), Deafness, autosomal dominant 28, 608641 (3), Ectodermal dysplasia/short stature syndrome, 616029 (3)
CCNA2	0.138171
SEMA4C	0.138165
DAB2IP	0.138153
SMG7	0.138125
CYP27C1	0.138084
STT3B	0.138058			?Congenital disorder of glycosylation, type Ix, 615597 (3)
ZNF445	0.138046
INTS2	0.138019
KDM1A	0.138014			Cleft palate, psychomotor retardation, and distinctive facial features, 616728 (3)
MTF2	0.138005
RSPRY1	0.137991			Spondyloepimetaphyseal dysplasia, Faden-Alkuraya type, 616723 (3)
NR2C2	0.137962
CCT2	0.137938
HELLS	0.137929			Immunodeficiency-centromeric instability-facial anomalies syndrome 4, 616911 (3)
PDE8B	0.137916			Pigmented nodular adrenocortical disease, primary, 3, 614190 (3), Striatal degeneration, autosomal dominant, 609161 (3)
GATAD2A	0.137914
COPB1	0.137893
SCUBE3	0.137875
NFE2L1	0.137864
TSHZ1	0.137861			Aural atresia, congenital, 607842 (3)
RBM39	0.137855
ZRANB1	0.137826
HDAC6	0.137799			?Chondrodysplasia with platyspondyly, distinctive brachydactyly, hydrocephaly, and microphthalmia, 300863 (3)
MGAT5	0.137794
AHSA1	0.137792
FKBP8	0.137785
POTEH	0.137767
DLG4	0.137756	1	0
AHR	0.137742
DPYSL3	0.137735	3	0
GLUL	0.137722			Glutamine deficiency, congenital, 610015 (3)
GPATCH8	0.137706
VAV1	0.137705
COL1A2	0.137697			Ehlers-Danlos syndrome, arthrochalasia type, 2, 617821 (3), Ehlers-Danlos syndrome, cardiac valvular type, 225320 (3), Osteogenesis imperfecta, type II, 166210 (3), Osteogenesis imperfecta, type IV, 166220 (3), imperfecta, type III, 259420 (3), {Osteoporosis, postmenopausal}, 166710 (3)
LRRC8B	0.137681
CNNM2	0.13768			Hypomagnesemia 6, renal, 613882 (3), Hypomagnesemia, seizures, and mental retardation, 616418 (3)
CORO1C	0.13767
NUFIP2	0.137656
SP4	0.13765
CNOT2	0.137636
ZC3H12C	0.137622
CCNJ	0.137622
ZNF384	0.137605
DENND1A	0.137584
SIK2	0.137577
SLC39A10	0.137559
RREB1	0.137557
ACVR2A	0.137552
USP19	0.137532
ADGRB2	0.137513
RPL3	0.137507
MAN1A2	0.137505
MAP2K7	0.137478
CHRM1	0.137472
MCMBP	0.137461
RSRC2	0.137448
ZNFX1	0.13743
NTNG2	0.137425		1
CCT5	0.137407			Neuropathy, hereditary sensory, with spastic paraplegia, 256840 (3)
CMTR1	0.137398
PPP1R9B	0.137386	1	0
NCOR2	0.137367
SLC13A2	0.137362
STIM2	0.137351
SATB1	0.13735	1	0
PRPF4	0.137336			Retinitis pigmentosa 70, 615922 (3)
HSP90B1	0.137333
ZNF644	0.137333			Myopia 21, autosomal dominant, 614167 (3)
GNAL	0.137316			Dystonia 25, 615073 (3)
RACK1	0.137308
MARF1	0.137304
TUT7	0.137304
LRP12	0.13729
CSK	0.137288
CSTF2	0.137279
RPL7	0.137275
TTC17	0.137268
PPP6R3	0.137259
SNW1	0.137254
RFX4	0.137233
SYK	0.137211
SMC2	0.1372			Smith-McCort dysplasia 2, 615222 (3)
FGD5	0.137172
SCAI	0.13717
CYFIP1	0.137163	2	0
PRKCG	0.13715			Spinocerebellar ataxia 14, 605361 (3)
ARVCF	0.137149
TUT4	0.137084
CCNK	0.137082		1
CTDSPL2	0.137079
KIF23	0.137051
FADS2	0.137047
FNIP1	0.137022
INPP4A	0.136967
TGM1	0.136962			Ichthyosis, congenital, autosomal recessive 1, 242300 (3)
GNL1	0.136918
XRCC5	0.136917
VPS54	0.136916
ATAD5	0.136916
MYCBP2	0.136915
AKAP6	0.136907
SIM1	0.136898			Obesity, severe, 601665 (3)
PIK3AP1	0.136826
NAA35	0.136812
EPB41L4B	0.136809
RELA	0.136806
SLC7A1	0.136801
DENND4A	0.136734
NFASC	0.136731
TNS3	0.136725
ESR1	0.136711			Estrogen resistance, 615363 (3), {Atherosclerosis, susceptibility to} (3), {Breast cancer}, 114480 (1), {HDL response to hormone replacement, augmented} (3), {Migraine, susceptibility to}, 157300 (3), {Myocardial infarction, susceptibility to}, 608446 (3)
TRIM3	0.136706
MARK4	0.136704
FAF1	0.136697
RABEP1	0.136695
SESTD1	0.136688
DDX6	0.136688
TRIM46	0.136671
NPAS2	0.136669	3	0
HNRNPUL2	0.136649
LNPEP	0.136628
ARIH1	0.136619
POU2F2	0.136617
CDH8	0.136613	3	0
WASF1	0.136567		1
AP2M1	0.136564
ARHGAP31	0.136562			Adams-Oliver syndrome 1, 100300 (3)
ZBTB47	0.136561
PDGFRA	0.136558			Gastrointestinal stromal tumor, somatic, 606764 (3), Hypereosinophilic syndrome, idiopathic, resistant to imatinib, 607685 (3)
CLOCK	0.136557
SH3KBP1	0.136554
MIER3	0.136533
LMNA	0.136509			Cardiomyopathy, dilated, 1A, 115200 (3), Charcot-Marie-Tooth disease, type 2B1, 605588 (3), Emery-Dreifuss muscular dystrophy 2, AD, 181350 (3), Emery-Dreifuss muscular dystrophy 3, AR, 616516 (3), Heart-hand syndrome, Slovenian type, 610140 (3), Hutchinson-Gilford progeria, 176670 (3), Lipodystrophy, familial partial, type 2, 151660 (3), Malouf syndrome, 212112 (3), Mandibuloacral dysplasia, 248…
ZNF280C	0.136504
HNF1B	0.136503			Diabetes mellitus, noninsulin-dependent, 125853 (3), Renal cysts and diabetes syndrome, 137920 (3), {Renal cell carcinoma}, 144700 (3)
MAPK8IP1	0.136501			{Diabetes mellitus, noninsulin-dependent}, 125853 (3)
PPM1A	0.136483
PRKCD	0.136403			Autoimmune lymphoproliferative syndrome, type III, 615559 (3)
EXOC5	0.136395	3	0
TP73	0.136393			?Neuroblastoma (1)
NELL2	0.136363
TEX11	0.136345			Spermatogenic failure, X-linked, 2, 309120 (3)
KDM4A	0.136344
MDGA2	0.136341	3	0
PAPOLG	0.136284	3	0
SENP5	0.136276
CYBB	0.136268			Chronic granulomatous disease, X-linked, 306400 (3), Immunodeficiency 34, mycobacteriosis, X-linked, 300645 (3)
CCNC	0.136234
GIT2	0.136225
KDM7A	0.136202
PPP1CB	0.136196			Noonan syndrome-like disorder with loose anagen hair 2, 617506 (3)
NR2F1	0.136188	3	1	Bosch-Boonstra-Schaaf optic atrophy syndrome, 615722 (3)
KIF4A	0.136186			?Mental retardation, X-linked 100, 300923 (3)
YAP1	0.136174			Coloboma, ocular, with or without hearing impairment, cleft lip/palate, and/or mental retardation, 120433 (3)
AEBP2	0.136169
GIMAP8	0.136162
ARMCX4	0.13615
CLK2	0.136149			You-Hoover-Fong syndrome, 616954 (3)
ZFPM2	0.136146			46XY sex reversal 9, 616067 (3), Diaphragmatic hernia 3, 610187 (3), Tetralogy of Fallot, 187500 (3)
PSIP1	0.136142
KPNA6	0.13614
TFAP4	0.136126
LEPR	0.136118			Obesity, morbid, due to leptin receptor deficiency, 614963 (3)
WNK3	0.136103	3	0
COPS3	0.136096
FAM71F1	0.136091
TPP2	0.136089
ZYG11B	0.136051
PPP5C	0.136037	1	0
TP63	0.136027			ADULT syndrome, 103285 (3), Ectrodactyly, ectodermal dysplasia, and cleft lip/palate syndrome 3, 604292 (3), Hay-Wells syndrome, 106260 (3), Limb-mammary syndrome, 603543 (3), Orofacial cleft 8, 129400 (3), Rapp-Hodgkin syndrome, 129400 (3), Split-hand/foot malformation 4, 605289 (3)
GPC3	0.135987			Simpson-Golabi-Behmel syndrome, type 1, 312870 (3), Wilms tumor, somatic, 194070 (3)
ACTR3B	0.135937
LIG3	0.135897
OSBP	0.135894
PUF60	0.135877			Verheij syndrome, 615583 (3)
FAM193A	0.135856
CROT	0.135856
NPAS3	0.135841
MEF2D	0.135834
HIC2	0.135826
STAT5B	0.135816			Growth hormone insensitivity with immunodeficiency, 245590 (3), Leukemia, acute promyelocytic, somatic, 102578 (3)
RAD21	0.135813		1	Cornelia de Lange syndrome 4, 614701 (3)
CENPB	0.135812
THRB	0.135796			Thyroid hormone resistance, 188570 (3), Thyroid hormone resistance, autosomal recessive, 274300 (3), Thyroid hormone resistance, selective pituitary, 145650 (3)
PRPF4B	0.135763
SEMA3F	0.13575
NPM1	0.135743			Leukemia, acute myeloid, somatic, 601626 (3)
GSPT2	0.135738
NR2F2	0.135737			Congenital heart defects, multiple types, 4, 615779 (3)
USP5	0.13573
FOXO1	0.135719
FMNL1	0.135717
COPS4	0.135714
COL7A1	0.135704			EBD inversa, 226600 (3), EBD, Bart type, 132000 (3), EBD, localisata variant (3), Epidermolysis bullosa dystrophica, AD, 131750 (3), Epidermolysis bullosa dystrophica, AR, 226600 (3), Epidermolysis bullosa pruriginosa, 604129 (3), Epidermolysis bullosa, pretibial, 131850 (3), Toenail dystrophy, isolated, 607523 (3), Transient bullous of the newborn, 131705 (3)
GABPA	0.135697
DDX21	0.135679
SPPL3	0.135662
ATP1B1	0.135645			[Blood pressure regulation QTL], 145500 (2)
PRKAR2B	0.135638
CDYL	0.135632
ATXN7L3	0.135631
FBXO33	0.135618	3	0
B4GALT5	0.135609
KCNQ5	0.135599			Mental retardation, autosomal dominant 46, 617601 (3)
AFTPH	0.135574
PACSIN1	0.135556
SRP54	0.135465
JAG2	0.135442
LIMK1	0.135429
FUS	0.135424			Amyotrophic lateral sclerosis 6, with or without frontotemporal dementia, 608030 (3), Essential tremor, hereditary, 4, 614782 (3)
MAML1	0.135409
SOX10	0.135406			PCWH syndrome, 609136 (3), Waardenburg syndrome, type 2E, with or without neurologic involvement, 611584 (3), Waardenburg syndrome, type 4C, 613266 (3)
DIAPH2	0.135348			?Premature ovarian failure 2A, 300511 (3)
NFATC3	0.135344
PLXNB2	0.135335
CADM4	0.13532
MBD1	0.135317	3	0
EEF1A2	0.135287		1	Epileptic encephalopathy, early infantile, 33, 616409 (3), Mental retardation, autosomal dominant 38, 616393 (3)
ARHGAP26	0.135272			Leukemia, juvenile myelomonocytic, somatic, 607785 (3)
IREB2	0.135259
RXRB	0.13524
UBQLN1	0.135213
ADAM23	0.135189
RAE1	0.135182
TTBK1	0.135166
PHF20	0.135153
GMPS	0.135137
ARNTL	0.135116
CPEB3	0.13509
MAST3	0.135085
RPL7A	0.135084
TAF5	0.135056
GRIPAP1	0.13505
ZZZ3	0.135041
BAP1	0.135019			Tumor predisposition syndrome, 614327 (3)
MEIOC	0.135004
EIF5B	0.135
MTUS1	0.134998
WDR1	0.134998
RIMS2	0.134997	3	1
ELL2	0.134976
IGF2BP1	0.134959
EFNB2	0.134955
CPEB4	0.134943	2	0
EIF4A2	0.13494
SLC4A2	0.134929
SSBP3	0.13491
COPS5	0.134906
CTNNA1	0.134904			Macular dystrophy, patterned, 2, 608970 (3)
FURIN	0.134889
PICALM	0.134871			Leukemia, acute myeloid, somatic, 601626 (3)
CRIM1	0.134853
FBXL5	0.13485
ASH2L	0.13485
ANKRD28	0.134843
TRAF3	0.134826			{?Encephalopathy, acute, infection-induced (herpes-specific), susceptibility to, 5}, 614849 (3)
HMBOX1	0.134823
DDI2	0.134811
MPPED2	0.134773
TNFAIP3	0.134765			Autoinflammatory syndrome, familial, Behcet-like, 616744 (3)
PIP5K1C	0.134751			Lethal congenital contractural syndrome 3, 611369 (3)
ENAH	0.134741
TM9SF4	0.13474	1	0
LRRC41	0.134729
ESPL1	0.134713
GJC1	0.13468
MIDEAS	0.134673
IRF2BP1	0.134654
PABPC1	0.134641
MAPK8	0.134605
BHLHE40	0.134597
NDC1	0.134581
ANKRD13C	0.13457
ANKRD34A	0.134545
MYC	0.134516			Burkitt lymphoma, 113970 (3), Myoclonus, familial cortical, 614937 (3)
P4HB	0.134494			Cole-Carpenter syndrome 1, 112240 (3)
FBLN5	0.134489			Cutis laxa, autosomal dominant 2, 614434 (3), Cutis laxa, autosomal recessive, type IA, 219100 (3), Macular degeneration, age-related, 3, 608895 (3), Neuropathy, hereditary, with or without age-related macular degeneration, 608895 (3)
WEE1	0.13445
OTUD5	0.134437
CTDSP1	0.13442
NKAP	0.134413
JPH4	0.134413
MGAT1	0.134388
ACHE	0.134363	2	0	[Blood group, Yt system], 112100 (3)
DNAJA2	0.134352
MAP2K4	0.134351
CBFA2T2	0.13435
WIZ	0.134335
ARPC2	0.134325
RORC	0.134321			Immunodeficiency 42, 616622 (3)
CHAF1A	0.134315
WDR41	0.134307
PHC1	0.134298			?Microcephaly 11, primary, autosomal recessive, 615414 (3)
ZNF319	0.134292
ROCK2	0.13429
SETD1B	0.134279	3	1
DAB1	0.134267			Ciliary dyskinesia, primary, 2, 606763 (3), Spinocerebellar ataxia 37, 615945 (3)
RBM14-RBM4	0.134263
CNTNAP5	0.134257	3	0
HMMR	0.134244			{Breast cancer, susceptibility to}, 114480 (3)
RNF2	0.134233
SMAD2	0.134232
JAKMIP1	0.134188
RPL5	0.134177			Diamond-Blackfan anemia 6, 612561 (3)
SLC25A39	0.134164	3	0
ETS2	0.13412
QSER1	0.134096
PLCB1	0.134088	2	0	Epileptic encephalopathy, early infantile, 12, 613722 (3)
GATA6	0.134067			Atrial septal defect 9, 614475 (3), Atrioventricular septal defect 5, 614474 (3), Pancreatic agenesis and congenital heart defects, 600001 (3), Persistent truncus arteriosus, 217095 (3), Tetralogy of Fallot, 187500 (3)
ZNF541	0.134061
ACTR2	0.134061
NYAP1	0.134057
HSPA4	0.134046
MARCHF6	0.134042
SLC9A7	0.134034
PCBP2	0.134006
ACTB	0.133984	1	1	?Dystonia, juvenile-onset, 607371 (3), Baraitser-Winter syndrome 1, 243310 (3)
NOL4L	0.133983
REV1	0.133961
CEP350	0.133958
ELFN1	0.133954
CNOT7	0.133931
FBXL17	0.133925
ASAH2	0.133922
CAMK2G	0.133908
MAPKAPK2	0.133881
SARNP	0.133858
KCND3	0.133852	3	0	Brugada syndrome 9, 616399 (3), Spinocerebellar ataxia 19, 607346 (3)
ZNF281	0.133847
NXF1	0.133845	3	0
PAIP1	0.133841
ZNRF3	0.133841
TBC1D10B	0.133832
AKAP7	0.133819
SLC4A4	0.133814			Renal tubular acidosis, proximal, with ocular abnormalities, 604278 (3)
LATS1	0.13381
KCNN2	0.133808
SLC25A14	0.133808
TFAP2B	0.133785			Char syndrome, 169100 (3), Patent ductus arteriosus 2, 617035 (3)
C11orf24	0.133777
MYO5A	0.133775	2	0	Griscelli syndrome, type 1, 214450 (3)
DBN1	0.13377
ZNF865	0.133764
AGAP2	0.133763	2	0
ELAVL1	0.133753
SMAD1	0.133728			Charcot-Marie-Tooth disease, type 2D, 601472 (3), Neuropathy, distal hereditary motor, type VA, 600794 (3)
RBM4	0.133726
MAPK1	0.133715
ZNF516	0.133714
APC2	0.133702			?Sotos syndrome 3, 617169 (3)
TOX3	0.133695
NFKBIA	0.133694			Ectodermal dysplasia, anhidrotic, with T-cell immunodeficiency, 612132 (3)
PCGF1	0.133681
PLS3	0.133679			Bone mineral density QTL18, osteoporosis, 300910 (3)
FBRS	0.133652
RBL2	0.133645
LMNB2	0.133622			?Epilepsy, progressive myoclonic, 9, 616540 (3), {Lipodystrophy, partial, acquired, susceptibility to}, 608709 (3)
AP3D1	0.133612			?Hermansky-Pudlak syndrome 10, 617050 (3)
[truncated: 16,989 more rows]

## Sheet: Missense_Final
gene	probability	score	syndromic	OMIM
SCN2A	0.297578	1	0	Epileptic encephalopathy, early infantile, 11, 613721 (3), Seizures, benign familial infantile, 3, 607745 (3)
CSNK2A1	0.285901	1	0	Okur-Chung neurodevelopmental syndrome, 617062 (3)
TRRAP	0.270421	3	1
DYNC1H1	0.266572	1	0	Charcot-Marie-Tooth disease, axonal, type 20, 614228 (3), Mental retardation, autosomal dominant 13, 614563 (3), Spinal muscular atrophy, lower extremity-predominant 1, AD, 158600 (3)
KCNQ2	0.265599	2	0	Epileptic encephalopathy, early infantile, 7, 613720 (3), Myokymia, 121200 (3), Seizures, benign neonatal, 1, 121200 (3)
TRIO	0.265398	1	0	Mental retardation, autosomal dominant 44, 617061 (3)
PPP2R5D	0.256852	1	0	Mental retardation, autosomal dominant 35, 616355 (3)
CDK13	0.256126		1	Congenital heart defects, dysmorphic facial features, and intellectual developmental disorder, 617360 (3)
SMARCA2	0.253076	1	1	Nicolaides-Baraitser syndrome, 601358 (3)
DDX3X	0.252111	1	0	Mental retardation, X-linked 102, 300958 (3)
SLC6A1	0.251263	1	0	Myoclonic-atonic epilepsy, 616421 (3)
ITPR1	0.247809	3	0	Gillespie syndrome, 206700 (3), Spinocerebellar ataxia 15, 606658 (3), Spinocerebellar ataxia 29, congenital nonprogressive, 117360 (3)
HECW2	0.245502	2	0	Neurodevelopmental disorder with hypotonia, seizures, and absent language, 617268 (3)
PLEC	0.241817			?Epidermolysis bullosa simplex with nail dystrophy, 616487 (3), Epidermolysis bullosa simplex with muscular dystrophy, 226670 (3), Epidermolysis bullosa simplex with pyloric atresia, 612138 (3), Epidermolysis bullosa simplex, Ogna type, 131950 (3), Muscular dystrophy, limb-girdle, type 2Q, 613723 (3)
RYR2	0.241471			Arrhythmogenic right ventricular dysplasia 2, 600996 (3), Ventricular tachycardia, catecholaminergic polymorphic, 1, 604772 (3)
GRIN2B	0.240808	1	0	Epileptic encephalopathy, early infantile, 27, 616139 (3), Mental retardation, autosomal dominant 6, 613970 (3)
DNMT3A	0.238047	1	0	Acute myeloid leukemia, somatic, 601626 (3), Tatton-Brown-Rahman syndrome, 615879 (3)
STXBP1	0.237728	1	0	Epileptic encephalopathy, early infantile, 4, 612164 (3)
FOXP1	0.237055	1	0	Mental retardation with language impairment and with or without autistic features, 613670 (3)
OBSCN	0.23703
SMARCA4	0.235997	1	0	Coffin-Siris syndrome 4, 614609 (3), {Rhabdoid tumor predisposition syndrome 2}, 613325 (3)
PIK3CA	0.235397			Breast cancer, somatic, 114480 (3), CLOVE syndrome, somatic, 612918 (3), Colorectal cancer, somatic, 114500 (3), Cowden syndrome 5, 615108 (3), Gastric cancer, somatic, 613659 (3), Hepatocellular carcinoma, somatic, 114550 (3), Keratosis, seborrheic, somatic, 182000 (3), Megalencephaly-capillary malformation-polymicrogyria syndrome, somatic, 602501 (3), Nevus, epidermal, somatic, 162900 (3), Nons…
LAMA5	0.234968
CASK	0.234821	1	0	FG syndrome 4, 300422 (3), Mental retardation and microcephaly with pontine and cerebellar hypoplasia, 300749 (3), Mental retardation, with or without nystagmus, 300422 (3)
GNAS	0.234643	3	0	ACTH-independent macronodular adrenal hyperplasia, 219080 (3), McCune-Albright syndrome, somatic, mosaic 174800 (3), Osseous heteroplasia, progressive, 166350 (3), Pituitary adenoma 3, multiple types, somatic, 617686 (3), Pseudohypoparathyroidism Ia, 103580 (3), Pseudohypoparathyroidism Ib, 603233 (3), Pseudohypoparathyroidism Ic, 612462 (3), Pseudopseudohypoparathyroidism, 612463 (3)
WDFY3	0.234231	1	0	?Microcephaly 18, primary, autosomal dominant, 617520 (3)
APC2	0.233447			?Sotos syndrome 3, 617169 (3)
NALCN	0.232819			Congenital contractures of the limbs and face, hypotonia, and developmental delay, 616266 (3), Hypotonia, infantile, with psychomotor retardation and characteristic facies 1, 615419 (3)
CTCF	0.23256	1	0	Mental retardation, autosomal dominant 21, 615502 (3)
UNC80	0.231562	3	0	Hypotonia, infantile, with psychomotor retardation and characteristic facies 2, 616801 (3)
PTEN	0.22931	1	0	Bannayan-Riley-Ruvalcaba syndrome, 153480 (3), Cowden syndrome 1, 158350 (3), Endometrial carcinoma, somatic, 608089 (3), Lhermitte-Duclos syndrome, 158350 (3), Macrocephaly/autism syndrome, 605309 (3), Malignant melanoma, somatic, 155600 (3), PTEN hamartoma tumor syndrome (3), Squamous cell carcinoma, head and neck, somatic, 275355 (3), VATER association with macrocephaly and ventriculomegaly, 2…
CACNA1H	0.229274	2	0	Hyperaldosteronism, familial, type IV, 617027 (3), {Epilepsy, childhood absence, susceptibility to, 6}, 611942 (3), {Epilepsy, idiopathic generalized, susceptibility to, 6}, 611942 (3)
CREBBP	0.229159	1	0	Rubinstein-Taybi syndrome 1, 180849 (3)
CACNA1A	0.228748	1	1	Epileptic encephalopathy, early infantile, 42, 617106 (3), Episodic ataxia, type 2, 108500 (3), Migraine, familial hemiplegic, 1, 141500 (3), Migraine, familial hemiplegic, 1, with progressive cerebellar ataxia, 141500 (3), Spinocerebellar ataxia 6, 183086 (3)
EEF1A2	0.227206		1	Epileptic encephalopathy, early infantile, 33, 616409 (3), Mental retardation, autosomal dominant 38, 616393 (3)
RYR1	0.226098			Central core disease, 117000 (3), King-Denborough syndrome, 145600 (3), Minicore myopathy with external ophthalmoplegia, 255320 (3), Neuromuscular disease, congenital, with uniform type 1 fiber, 117000 (3), {Malignant hyperthermia susceptibility 1}, 145600 (3)
ADGRV1	0.225156			?Febrile seizures, familial, 4, 604352 (3), Usher syndrome, type 2C, 605472 (3), Usher syndrome, type 2C, GPR98/PDZD7 digenic, 605472 (3)
LRP1B	0.22256
CSMD1	0.221109	3	0
CLASP1	0.22075	2	0
MYO1E	0.219347	3	0	Glomerulosclerosis, focal segmental, 6, 614131 (3)
DNAH10	0.219035	3	0
PTPRT	0.218899	3	0
ZSWIM8	0.217212
CBL	0.217156			?Juvenile myelomonocytic leukemia, 607785 (3), Noonan syndrome-like disorder with or without juvenile myelomonocytic leukemia, 613563 (3)
PACS1	0.2155	1	0	Schuurs-Hoeijmakers syndrome, 615009 (3)
TAF6	0.215292	2	0	Alazami-Yuan syndrome, 617126 (3)
GOLGA3	0.214825
ZFHX3	0.214486			{Prostate cancer, susceptibility to, somatic}, 176807 (3)
MAGEC1	0.214376
SLC6A13	0.212979
NEB	0.212938			Nemaline myopathy 2, autosomal recessive, 256030 (3)
PRKD1	0.21283		1	Congenital heart defects and ectodermal dysplasia, 617364 (3)
CHD2	0.212577	1	0	Epileptic encephalopathy, childhood-onset, 615369 (3)
MAP2K1	0.211801			Cardiofaciocutaneous syndrome 3, 615279 (3)
PHRF1	0.211503	2	0
FAT1	0.211428	3	0
NOTCH1	0.211221			Adams-Oliver syndrome 5, 616028 (3), Aortic valve disease 1, 109730 (3)
PHIP	0.210766	1	0	Developmental delay, intellectual disability, obesity, and dysmorphic features, 617991 (3)
CERT1	0.210454
PRKCA	0.210298	3	0	Pituitary tumor, invasive (3)
PKHD1	0.209788			Polycystic kidney disease 4, with or without hepatic disease, 263200 (3)
ACACB	0.209573
GNAI1	0.209055	1	0
LAMB1	0.208591	2	0	Lissencephaly 5, 615191 (3)
PTPN11	0.208185	1	0	LEOPARD syndrome 1, 151100 (3), Leukemia, juvenile myelomonocytic, somatic, 607785 (3), Metachondromatosis, 156250 (3), Noonan syndrome 1, 163950 (3)
CIT	0.208029			Microcephaly 17, primary, autosomal recessive, 617090 (3)
TBL1XR1	0.208004	1	0	Mental retardation, autosomal dominant 41 , 616944 (3), Pierpont syndrome, 602342 (3)
DNAH1	0.205797			?Ciliary dyskinesia, primary, 37, 617577 (3), Spermatogenic failure 18, 617576 (3)
DPYSL5	0.203606
CYFIP2	0.203283			Epileptic encephalopathy, early infantile, 65, 618008 (3)
TET2	0.203151	2	0	Myelodysplastic syndrome, somatic, 614286 (3)
KIF26A	0.202842
SCN8A	0.202784	1	0	?Cognitive impairment with or without cerebellar ataxia, 614306 (3), Epileptic encephalopathy, early infantile, 13, 614558 (3), Seizures, benign familial infantile, 5, 617080 (3)
KCNQ3	0.202457	1	0	Seizures, benign neonatal, 2, 121201 (3)
GABRB3	0.202106	1	0	Epileptic encephalopathy, early infantile, 43, 617113 (3), {Epilepsy, childhood absence, susceptibility to, 5}, 612269 (3)
KCNB1	0.201235	1	0	Epileptic encephalopathy, early infantile, 26, 616056 (3)
LAMC3	0.201129			Cortical malformations, occipital, 614115 (3)
SMAD4	0.20088	2	0	Juvenile polyposis/hereditary hemorrhagic telangiectasia syndrome, 175050 (3), Myhre syndrome, 139210 (3), Pancreatic cancer, somatic, 260350 (3), Polyposis, juvenile intestinal, 174900 (3)
CHD7	0.199957	1	0	CHARGE syndrome, 214800 (3), Hypogonadotropic hypogonadism 5 with or without anosmia, 612370 (3)
UBR5	0.199824	2	0
NOTCH3	0.199781			?Myofibromatosis, infantile 2, 615293 (3), Cerebral arteriopathy with subcortical infarcts and leukoencephalopathy 1, 125310 (3), Lateral meningocele syndrome, 130720 (3)
MROH5	0.199568
HDAC8	0.199551		1	Cornelia de Lange syndrome 5, 300882 (3)
FOXG1	0.199214	1	0	Rett syndrome, congenital variant, 613454 (3)
TCF4	0.198827	1	0	Corneal dystrophy, Fuchs endothelial, 3, 613267 (3), Pitt-Hopkins syndrome, 610954 (3), {Diabetes mellitus, type 2, susceptibility to}, 125853 (3)
FBN3	0.198535
NOTCH2	0.198409			Alagille syndrome 2, 610205 (3), Hajdu-Cheney syndrome, 102500 (3)
DNAH11	0.19744			Ciliary dyskinesia, primary, 7, with or without situs inversus, 611884 (3)
ATP1A3	0.196789	3	1	Alternating hemiplegia of childhood 2, 614820 (3), CAPOS syndrome, 601338 (3), Dystonia-12, 128235 (3)
ANKRD20A1	0.196785
PCDH10	0.195991	3	0
KMT2B	0.194905			Dystonia 28, childhood-onset, 617284 (3)
RAB11A	0.194533
ANK3	0.194487	1	0	?Mental retardation, autosomal recessive, 37, 615493 (3)
SYT1	0.194148		1
RRP8	0.193152
PRKDC	0.193	3	0	Immunodeficiency 26, with or without neurologic abnormalities, 615966 (3)
PTPN23	0.192515
EP400	0.191623	2	0
DDX23	0.190501
FN1	0.189773			Glomerulopathy with fibronectin deposits 2, 601894 (3), Plasma fibronectin deficiency, 614101 (1), Spondylometaphyseal dysplasia, corner fracture type, 184255 (3)
PRRC2C	0.18953
PLCG2	0.18928			Autoinflammation, antibody deficiency, and immune dysregulation syndrome, 614878 (3), Familial cold autoinflammatory syndrome 3, 614468 (3)
MYO5C	0.18891	3	0
INSM2	0.188638
MECOM	0.188327			Radioulnar synostosis with amegakaryocytic thrombocytopenia 2, 616738 (3)
BOD1L1	0.188189
ACTC1	0.18692			Atrial septal defect 5, 612794 (3), Cardiomyopathy, dilated, 1R, 613424 (3), Cardiomyopathy, hypertrophic, 11, 612098 (3), Left ventricular noncompaction 4, 613424 (3)
C2CD3	0.186773			?Orofaciodigital syndrome XIV, 615948 (3)
SOX4	0.186222
U2AF2	0.186057
BRAF	0.185968	1	0	Adenocarcinoma of lung, somatic, 211980 (3), Cardiofaciocutaneous syndrome, 115150 (3), Colorectal cancer, somatic (3), LEOPARD syndrome 3, 613707 (3), Melanoma, malignant, somatic (3), Nonsmall cell lung cancer, somatic (3), Noonan syndrome 7, 613706 (3)
MEF2C	0.185585	1	0	Chromosome 5q14.3 deletion syndrome, 613443 (4), Mental retardation, stereotypic movements, epilepsy, and/or cerebral malformations, 613443 (3)
KCNJ6	0.185379			Keppen-Lubinsky syndrome, 614098 (3)
GIGYF2	0.184968	1	0	{Parkinson disease 11}, 607688 (3)
PLXNA1	0.184603
KIRREL3	0.184528	2	0
SZT2	0.184366			Epileptic encephalopathy, early infantile, 18, 615476 (3)
KMT5B	0.184218	1	0	Mental retardation, autosomal dominant 51, 617788 (3)
DIDO1	0.18417
ABLIM1	0.183847
AP2M1	0.183601
ANKRD17	0.182953
PTK7	0.182951	1	0
GPRIN2	0.181973
KMT2A	0.181933	1	0	Leukemia, myeloid/lymphoid or mixed-lineage (2), Wiedemann-Steiner syndrome, 605130 (3)
UBE3C	0.181543	2	0
FAT3	0.181202
RBM27	0.180898	2	0
USH2A	0.180862	3	0	Retinitis pigmentosa 39, 613809 (3), Usher syndrome, type 2A, 276901 (3)
TLE4	0.18068
MTOR	0.180141	2	1	Focal cortical dysplasia, type II, somatic, 607341 (3), Smith-Kingsmore syndrome, 616638 (3)
KMT2C	0.179746	1	0	Kleefstra syndrome 2, 617768 (3)
IGDCC4	0.179704
ZNF804B	0.179599
PRR12	0.179304	1	0
ABCA2	0.179121
ZNF142	0.178351
COL2A1	0.178296			Achondrogenesis, type II or hypochondrogenesis, 200610 (3), Avascular necrosis of the femoral head, 608805 (3), Czech dysplasia, 609162 (3), Epiphyseal dysplasia, multiple, with myopia and deafness, 132450 (3), Kniest dysplasia, 156550 (3), Legg-Calve-Perthes disease, 150600 (3), Osteoarthritis with mild chondrodysplasia, 604864 (3), Platyspondylic skeletal dysplasia, Torrance type, 151210 (3), S…
POLQ	0.178062
MYH11	0.177709			Aortic aneurysm, familial thoracic 4, 132900 (3)
MTF2	0.177488
IQSEC2	0.177419	1	0	Mental retardation, X-linked 1/78, 309530 (3)
VPS13D	0.176681
SUSD4	0.176345
GABRB2	0.176287	1	0	Epileptic encephalopathy, infantile or early childhood, 2, 617829 (3)
FBN2	0.175965			Contractural arachnodactyly, congenital, 121050 (3), Macular degeneration, early-onset, 616118 (3)
PRUNE2	0.175372	3	0
HECTD4	0.175267	1	0
TFAP4	0.175254
DENND4A	0.175189
SMC3	0.174999	3	1	Cornelia de Lange syndrome 3, 610759 (3)
SOX11	0.174518			Mental retardation, autosomal dominant 27, 615866 (3)
GAS2L2	0.174476
DLC1	0.173985			Colorectal cancer, somatic, 114500 (3), Esophageal cancer, 133239 (1), Lung cancer, 211980 (1)
TNK2	0.173586
BTF3	0.17358
KCNC1	0.173546	3	0	Epilepsy, progressive myoclonic 7, 616187 (3)
METTL16	0.172873
HIF3A	0.172846
MTCL1	0.172262
ABCC5	0.172212
CEP131	0.172178
DST	0.171886	3	0	?Neuropathy, hereditary sensory and autonomic, type VI, 614653 (3), Epidermolysis bullosa simplex, autosomal recessive 2, 615425 (3)
AGO1	0.17177	2	0
BRD3	0.171722
KCNMA1	0.171592	3	0	?Cerebellar atrophy, developmental delay, and seizures, 617643 (3), Paroxysmal nonkinesigenic dyskinesia, 3, with or without generalized epilepsy, 609446 (3)
P4HA2	0.17138	2	0	Myopia 25, autosomal dominant, 617238 (3)
ATP2A1	0.171224			Brody myopathy, 601003 (3)
MFRP	0.171115	2	0	Microphthalmia, isolated 5, 611040 (3), Nanophthalmos 2, 609549 (3)
EBF3	0.170956	1	0	Hypotonia, ataxia, and delayed development syndrome, 617330 (3)
DOCK7	0.17091			Epileptic encephalopathy, early infantile, 23, 615859 (3)
PAPOLG	0.170837	3	0
CSNK1E	0.170764	3	0
SHB	0.170718
SIGIRR	0.170703
PIKFYVE	0.170377			Corneal fleck dystrophy, 121850 (3)
SRBD1	0.17033
C3	0.170278			C3 deficiency, 613779 (3), {Hemolytic uremic syndrome, atypical, susceptibility to, 5}, 612925 (3), {Macular degeneration, age-related, 9}, 611378 (3)
MLH1	0.169877			Colorectal cancer, hereditary nonpolyposis, type 2, 609310 (3), Mismatch repair cancer syndrome, 276300 (3), Muir-Torre syndrome, 158320 (3)
SLC9C1	0.16948
LRRC4C	0.169462	1	0
LAMC1	0.169316
KIF13B	0.169233	3	0
LRRC37A3	0.168459
ZNF215	0.168302
FBXO11	0.168221	3	1
PDK2	0.168109	3	0
PAOX	0.167767
POLE	0.167445
IL22RA1	0.167107
ZFPM2	0.166808			46XY sex reversal 9, 616067 (3), Diaphragmatic hernia 3, 610187 (3), Tetralogy of Fallot, 187500 (3)
USP9X	0.166573	1	1	Mental retardation, X-linked 99, 300919 (3), Mental retardation, X-linked 99, syndromic, female-restricted, 300968 (3)
YWHAG	0.166488	3	1	Epileptic encephalopathy, early infantile, 56, 617665 (3)
SLC12A2	0.166474
SCAF11	0.166382
DOCK1	0.166184	3	0
PURA	0.1661			Mental retardation, autosomal dominant 31, 616158 (3)
MYO9B	0.165713	2	0	{Celiac disease, susceptibility to, 4}, 609753 (3)
CAMK2A	0.1654	3	1	Mental retardation, autosomal dominant 53, 617798 (3)
ITGA7	0.165338			Muscular dystrophy, congenital, due to ITGA7 deficiency, 613204 (3)
PYHIN1	0.165187	2	0
MYO15A	0.165153			Deafness, autosomal recessive 3, 600316 (3)
NUP188	0.164927
ITGA2B	0.164914			Bleeding disorder, platelet-type, 16, autosomal dominant, 187800 (3), Glanzmann thrombasthenia, 273800 (3), Thrombocytopenia, neonatal alloimmune, BAK antigen related (3)
SPTB	0.164742			Anemia, neonatal hemolytic, fatal or near-fatal, 617948 (3), Elliptocytosis-3, 617948 (3), Spherocytosis, type 2, 616649 (3)
COL7A1	0.164679			EBD inversa, 226600 (3), EBD, Bart type, 132000 (3), EBD, localisata variant (3), Epidermolysis bullosa dystrophica, AD, 131750 (3), Epidermolysis bullosa dystrophica, AR, 226600 (3), Epidermolysis bullosa pruriginosa, 604129 (3), Epidermolysis bullosa, pretibial, 131850 (3), Toenail dystrophy, isolated, 607523 (3), Transient bullous of the newborn, 131705 (3)
ABCA1	0.164534			HDL deficiency, type 2, 604091 (3), Tangier disease, 205400 (3), {Coronary artery disease in familial hypercholesterolemia, protection against}, 143890 (3)
MED13	0.164478	1	0
SLC34A1	0.164453			?Fanconi renotubular syndrome 2, 613388 (3), Hypercalcemia, infantile, 2, 616963 (3), Nephrolithiasis/osteoporosis, hypophosphatemic, 1, 612286 (3)
PPP2R1A	0.164404			Mental retardation, autosomal dominant 36, 616362 (3)
RPTOR	0.164129
TRAPPC9	0.164104	2	0	Mental retardation, autosomal recessive 13, 613192 (3)
HMGXB3	0.164051
PPL	0.163809
ASAP2	0.163597	2	0
AFF3	0.163365
ARID1B	0.162944	1	0	Coffin-Siris syndrome 1, 135900 (3)
GALR3	0.162737
VCX3A	0.162468
CEP350	0.1624
KAT6B	0.16224	3	0	Genitopatellar syndrome, 606170 (3), SBBYSS syndrome, 603736 (3)
CEP85	0.162138
KLHL25	0.161672
PACS2	0.161623		1
SETD1A	0.161358	1	0
GRIK5	0.160968	2	0
ANKHD1-EIF4EBP3	0.160931
MPDZ	0.160879			Hydrocephalus, nonsyndromic, autosomal recessive 2, 615219 (3)
TAF1	0.160818		1	Dystonia-Parkinsonism, X-linked, 314250 (3), Mental retardation, X-linked, syndromic 33, 300966 (3)
EPHA5	0.16057
SEC16A	0.160552
NIPBL	0.160427	1	0	Cornelia de Lange syndrome 1, 122470 (3)
EIF4G2	0.160324
TRAF7	0.160225	1	0
ANKHD1	0.160144
HUWE1	0.160068		1	Mental retardation, X-linked syndromic, Turner type, 300706 (3)
CCAR1	0.159989
GON4L	0.159384
GPR108	0.158657
SYNGAP1	0.15862	1	0	Mental retardation, autosomal dominant 5, 612621 (3)
DIS3L2	0.158305			Perlman syndrome, 267000 (3)
OTOGL	0.158277			Deafness, autosomal recessive 84B, 614944 (3)
CSAD	0.157921
MPL	0.157806			Myelofibrosis with myeloid metaplasia, somatic, 254450 (3), Thrombocythemia 2, 601977 (3), Thrombocytopenia, congenital amegakaryocytic, 604498 (3)
KDM3A	0.157274
BAG3	0.157179			Cardiomyopathy, dilated, 1HH, 613881 (3), Myopathy, myofibrillar, 6, 612954 (3)
KIF19	0.157088
ELP3	0.156768
BAZ1B	0.156489
ABR	0.156459
MEGF11	0.156268	3	0
PSMC5	0.156232
TTC17	0.155792
ZFP36	0.155616
NUDCD2	0.155158	2	0
FAT2	0.155153			Spinocerebellar ataxia 45, 617769 (3)
SPEG	0.15515			Centronuclear myopathy 5, 615959 (3)
RUSC1	0.155048
ALMS1	0.154638			Alstrom syndrome, 203800 (3)
BRCA2	0.154548	3	0	Fanconi anemia, complementation group D1, 605724 (3), Wilms tumor, 194070 (3), {Breast cancer, male, susceptibility to}, 114480 (3), {Breast-ovarian cancer, familial, 2}, 612555 (3), {Glioblastoma 3}, 613029 (3), {Medulloblastoma}, 155255 (3), {Pancreatic cancer 2}, 613347 (3), {Prostate cancer}, 176807 (3)
RUFY1	0.15425
ZNF462	0.15418	1	0
STRIP2	0.153952
SIAH1	0.153804
SVEP1	0.153729
ZFP69	0.153693
NBEAL2	0.153682			Gray platelet syndrome, 139090 (3)
DENND5A	0.153606			Epileptic encephalopathy, early infantile, 49, 617281 (3)
GTF3C5	0.153366
CRACR2B	0.15332
STXBP5L	0.153134
ABI2	0.153001
MYH3	0.152288			Arthrogryposis, distal, type 2A, 193700 (3), Arthrogryposis, distal, type 2B, 601680 (3), Arthrogryposis, distal, type 8, 178110 (3)
NLRX1	0.151844
ABI3BP	0.151558
PDZD8	0.151547
CDKL5	0.151429	1	0	Epileptic encephalopathy, early infantile, 2, 300672 (3)
EGLN2	0.151395
PDGFRB	0.151088			Basal ganglia calcification, idiopathic, 4, 615007 (3), Kosaki overgrowth syndrome, 616592 (3), Myeloproliferative disorder with eosinophilia, 131440 (4), Myofibromatosis, infantile, 1, 228550 (3), Premature aging syndrome, Penttinen type, 601812 (3)
GSE1	0.150907
CCDC57	0.150882
ZFC3H1	0.150749
PTGFRN	0.150495
MED15	0.150412
SMARCD1	0.150161
EPAS1	0.149905			Erythrocytosis, familial, 4, 611783 (3)
TULP4	0.149605
WDR4	0.149507
NACC1	0.149312	1	0	Neurodevelopmental disorder with epilepsy, cataracts, feeding difficulties, and delayed brain myelination, 617393 (3)
SLX4	0.149297			Fanconi anemia, complementation group P, 613951 (3)
SMG6	0.149221	3	0
CHD8	0.149204	1	0	{Autism, susceptibility to, 18}, 615032 (3)
NCKAP5L	0.149194
RFX2	0.149
CNTD2	0.148975
TBC1D20	0.148577			Warburg micro syndrome 4, 615663 (3)
PNKD	0.148534
SRGAP3	0.148482	3	0
ARHGEF28	0.148439
NLRC5	0.148116
CACNA1G	0.148093	3	0	Spinocerebellar ataxia 42, 616795 (3)
IRS2	0.147952			{Diabetes mellitus, noninsulin-dependent}, 125853 (3)
PLOD2	0.147857			Bruck syndrome 2, 609220 (3)
WASHC2C	0.147656
ZNF333	0.147528
AGT	0.147265			Renal tubular dysgenesis, 267430 (3), {Hypertension, essential, susceptibility to}, 145500 (3), {Preeclampsia, susceptibility to} (3)
FANCM	0.147205
ZNF555	0.147049
DCAF11	0.14704
NLGN1	0.14704	2	0
SPATA31A6	0.146851
CLDN5	0.145983
UMODL1	0.145891
TWF1	0.145744
DNAH9	0.145545
TSPYL1	0.145395			Sudden infant death with dysgenesis of the testes syndrome, 608800 (3)
ZRANB1	0.144773
CUL7	0.144764	2	0	3-M syndrome 1, 273750 (3)
MYO7B	0.144727
MDC1	0.144657
UNC45B	0.144597			?Cataract 43, 616279 (3)
CCDC87	0.144536
TTLL12	0.143764
SPEN	0.143657	2	0	Megakaryoblastic leukemia, acute (2)
NR2F1	0.143492	3	1	Bosch-Boonstra-Schaaf optic atrophy syndrome, 615722 (3)
ELOA	0.143463
LPIN2	0.143418			Majeed syndrome, 609628 (3)
BFSP1	0.14306			Cataract 33, multiple types, 611391 (3)
MORC2	0.143003			Charcot-Marie-Tooth disease, axonal, type 2Z, 616688 (3)
ATP11C	0.142752
PAN2	0.142697
RBBP6	0.142544
WASHC5	0.142524
KALRN	0.142483			{Coronary heart disease, susceptibility to, 5}, 608901 (3)
KCNK3	0.142453			Pulmonary hypertension, primary, 4, 615344 (3)
ARHGAP39	0.142292
TLE2	0.14175
G3BP2	0.141621
ITGB4	0.141594			Epidermolysis bullosa of hands and feet, 131800 (3), Epidermolysis bullosa, junctional, non-Herlitz type, 226650 (3), Epidermolysis bullosa, junctional, with pyloric atresia, 226730 (3)
CDK18	0.141566
PKP3	0.141544
WWOX	0.141376	2	0	Epileptic encephalopathy, early infantile, 28, 616211 (3), Esophageal squamous cell carcinoma, somatic, 133239 (3), Spinocerebellar ataxia, autosomal recessive 12, 614322 (3)
IQUB	0.141346
NDRG3	0.141289
GRM7	0.140789	3	0
PPP5C	0.140754	1	0
TRIP12	0.140695	1	0	Mental retardation, autosomal dominant 49, 617752 (3)
TJP1	0.140679
UPF1	0.140536
CLTC	0.140481			Mental retardation, autosomal dominant 56, 617854 (3)
B4GALNT4	0.140437
CACNA1B	0.140365	3	0	?Dystonia 23, 614860 (3)
NIPSNAP1	0.140307
SECISBP2	0.140065			Thyroid hormone metabolism, abnormal, 609698 (3)
ADCY6	0.139888			?Lethal congenital contracture syndrome 8, 616287 (3)
SLC39A12	0.139693
ASPSCR1	0.139614			Alveolar soft-part sarcoma, 606243 (3)
CRAMP1	0.139584
PTPRS	0.139579
SLCO1C1	0.139517
MIDN	0.139289
NUMA1	0.139258			Leukemia, acute promyelocytic, somatic, 612376 (3)
GNPDA2	0.138909
AGO4	0.138819	2	0
ATG9B	0.138769
BCR	0.138727			Leukemia, acute lymphocytic, somatic, 613065 (3), Leukemia, chronic myeloid, somatic, 608232 (3)
SOX5	0.138474	1	0	Lamb-Shaffer syndrome, 616803 (3)
EFTUD2	0.138163			Mandibulofacial dysostosis, Guion-Almeida type, 610536 (3)
ARHGAP21	0.138
GTF3C1	0.137927
PROP1	0.137829			Pituitary hormone deficiency, combined, 2, 262600 (3)
CDH18	0.137713
MAST3	0.13769
ATP2B4	0.137509
AP3D1	0.137464			?Hermansky-Pudlak syndrome 10, 617050 (3)
APOB	0.137415			Hypercholesterolemia, due to ligand-defective apo B, 144010 (3), Hypobetalipoproteinemia, 615558 (3)
ZNF646	0.13737
FMOD	0.137186
ADGRL2	0.13714
FAIM2	0.136882
AMPD2	0.136761			?Spastic paraplegia 63, 615686 (3), Pontocerebellar hypoplasia, type 9, 615809 (3)
TTBK1	0.136634
FLT3	0.136618			Leukemia, acute lymphoblastic, somatic, 613065 (3), Leukemia, acute myeloid, reduced survival in, somatic, 601626 (3), Leukemia, acute myeloid, somatic, 601626 (3)
SNAPC5	0.136275
H2AC6	0.136043
MUC17	0.135816
IQGAP3	0.135799	3	0
ADCY5	0.135771	3	0	Dyskinesia, familial, with facial myokymia, 606703 (3)
ARHGAP35	0.135736
CCNB3	0.135566
CHRND	0.135464			?Myasthenic syndrome, congenital, 3A, slow-channel, 616321 (3), ?Myasthenic syndrome, congenital, 3C, associated with acetylcholine receptor deficiency, 616323 (3), Multiple pterygium syndrome, lethal type, 253290 (3), Myasthenic syndrome, congenital, 3B, fast-channel, 616322 (3)
ZNF681	0.1354
ZBTB20	0.135329	1	0	Primrose syndrome, 259050 (3)
CRY2	0.135308
ASPHD2	0.135269
ZNF831	0.13522
PLXNA2	0.135159
SEC23A	0.135143			Craniolenticulosutural dysplasia, 607812 (3)
CEP170B	0.135073
KAT8	0.13506
CHD9	0.134999
CADM1	0.134495	3	0
STK39	0.134487	3	0
ELAVL3	0.134477	1	0
H4C3	0.134474
UIMC1	0.13447	3	0
SIX3	0.134216			Holoprosencephaly 2, 157170 (3), Schizencephaly, 269160 (3)
EXTL1	0.134062
SPTBN4	0.134005			?Myopathy, congenital, with neuropathy and deafness, 617519 (3)
COL5A2	0.133969			Ehlers-Danlos syndrome, classic type, 2, 130010 (3)
ZNF208	0.133946
FRAS1	0.133923			Fraser syndrome 1, 219000 (3)
BNC1	0.133826
CCN6	0.133778
NSUN6	0.133745
HSPA12B	0.133551
ZBTB41	0.133487
TEP1	0.133159
NFATC1	0.133154
GSTA1	0.133147
HSPA4	0.133072
ZNF880	0.132925
H2AC8	0.13292
ZNF497	0.132884
PLAC8L1	0.132867
TFEB	0.132794
MAST2	0.132776
NPBWR2	0.132766
ITPR3	0.132766			{Diabetes, type 1, susceptibility to}, 222100 (2)
CX3CL1	0.132642
PDE4B	0.132505
ABCC9	0.132481			Atrial fibrillation, familial, 12, 614050 (3), Cardiomyopathy, dilated, 1O, 608569 (3), Hypertrichotic osteochondrodysplasia, 239850 (3)
ATIC	0.132471			AICA-ribosiduria due to ATIC deficiency, 608688 (3)
SPECC1L	0.13241			?Facial clefting, oblique, 1, 600251 (3), Opitz GBBB syndrome, type II, 145410 (3)
LRRC49	0.132281
TMEM94	0.132187
HSPA12A	0.132096
SKIDA1	0.131914
SLC12A9	0.131711
PLEKHB2	0.131631
NKTR	0.131526
SLC26A9	0.131436
TRAPPC10	0.131421
STC1	0.131327
PUF60	0.131326			Verheij syndrome, 615583 (3)
ABCF1	0.131325
USP50	0.131277
PXDNL	0.131273
GRK5	0.131181
EXOC5	0.131153	3	0
PEAR1	0.131037
UBE2S	0.130922
LARGE1	0.130896
SNX22	0.130862
WNK1	0.130644			Neuropathy, hereditary sensory and autonomic, type II, 201300 (3), Pseudohypoaldosteronism, type IIC, 614492 (3)
PLEKHA8	0.130605
TRIM23	0.130539	1	0
WDR26	0.130527		1	Skraban-Deardorff syndrome, 617616 (3)
CRB2	0.130494			Focal segmental glomerulosclerosis 9, 616220 (3), Ventriculomegaly with cystic kidney disease, 219730 (3)
STAT5A	0.130479
RECQL4	0.130367			Baller-Gerold syndrome, 218600 (3), RAPADILINO syndrome, 266280 (3), Rothmund-Thomson syndrome, 268400 (3)
RTEL1	0.130363			Dyskeratosis congenita, autosomal dominant 4, 615190 (3), Dyskeratosis congenita, autosomal recessive 5, 615190 (3), Pulmonary fibrosis and/or bone marrow failure, telomere-related, 3, 616373 (3)
CNPY2	0.130363
GNAO1	0.130202			Epileptic encephalopathy, early infantile, 17, 615473 (3), Neurodevelopmental disorder with involuntary movements, 617493 (3)
XYLT1	0.130125			Desbuquois dysplasia 2, 615777 (3), {Pseudoxanthoma elasticum, modifier of severity of}, 264800 (3)
ANO3	0.129919			Dystonia 24, 615034 (3)
CGNL1	0.129906	2	0
ADCY9	0.129904
STXBP5	0.12973	2	0
LRP4	0.129703			?Myasthenic syndrome, congenital, 17, 616304 (3), Cenani-Lenz syndactyly syndrome, 212780 (3), Sclerosteosis 2, 614305 (3)
SGSM3	0.129617	3	0
ZFAT	0.129575
TNNI2	0.129521			Arthrogryposis multiplex congenita, distal, type 2B, 601680 (3)
DNHD1	0.129505
NLGN2	0.129255	1	0
PDZRN4	0.129254
SLC30A3	0.129044
ZAP70	0.128951			Autoimmune disease, multisystem, infantile-onset, 2, 617006 (3), Immunodeficiency 48, 269840 (3)
CDYL2	0.128929
SH2D3C	0.128844
ACACA	0.128789			Acetyl-CoA carboxylase deficiency, 613933 (1)
GNB2	0.128756
DAPK1	0.128725
SI	0.128666			Sucrase-isomaltase deficiency, congenital, 222900 (3)
CUX1	0.128573	2	0
ATP10A	0.128561	2	0
SLITRK5	0.128321	2	0
WDR91	0.128172
CENPJ	0.128142			?Seckel syndrome 4, 613676 (3), Microcephaly 6, primary, autosomal recessive, 608393 (3)
TCF3	0.128084			Agammaglobulinemia 8, autosomal dominant, 616941 (3)
GALNT9	0.127846
AGAP1	0.127843	3	0
SYMPK	0.127795
TET3	0.127734		1
ATP2B2	0.127701	2	0	{Deafness, autosomal recessive 12, modifier of}, 601386 (3)
CABP7	0.127606
MGAT4B	0.12758
HERC2	0.127523		1	Mental retardation, autosomal recessive 38, 615516 (3), [Skin/hair/eye pigmentation 1, blond/brown hair], 227220 (3), [Skin/hair/eye pigmentation 1, blue/nonblue eyes], 227220 (3)
PPP1CB	0.127519			Noonan syndrome-like disorder with loose anagen hair 2, 617506 (3)
RGPD3	0.127505
TANC1	0.127431
ANK2	0.127401	1	0	Cardiac arrhythmia, ankyrin-B-related, 600919 (3), Long QT syndrome 4, 600919 (3)
COL20A1	0.127313
RAPGEF2	0.12729
KCNJ4	0.127195
EHD1	0.127181
FAM135B	0.127164
DDX50	0.127116
TFE3	0.127097			Renal cell carcinoma, papillary, 1, 300854 (3)
MANBA	0.126925			Mannosidosis, beta, 248510 (3)
LRRC31	0.126909
HMCN1	0.126873			{Macular degeneration, age-related, 1}, 603075 (3)
TRPV4	0.126816			?Avascular necrosis of femoral head, primary, 2, 617383 (3), Brachyolmia type 3, 113500 (3), Digital arthropathy-brachydactyly, familial, 606835 (3), Hereditary motor and sensory neuropathy, type IIc, 606071 (3), Metatropic dysplasia, 156530 (3), Parastremmatic dwarfism, 168400 (3), SED, Maroteaux type, 184095 (3), Scapuloperoneal spinal muscular atrophy, 181405 (3), Spinal muscular atrophy, dist…
LTK	0.126724
HERC1	0.126668			Macrocephaly, dysmorphic facies, and psychomotor retardation, 617011 (3)
TENT2	0.126586
SIRPB1	0.126563
CD163L1	0.126545
FLNC	0.126475			Cardiomyopathy, familial hypertrophic, 26 (3), Cardiomyopathy, familial restrictive 5, 617047 (3), Myopathy, distal, 4, 614065 (3), Myopathy, myofibrillar, 5, 609524 (3)
ARAP1	0.126368
SCN7A	0.126327
CNOT1	0.126258	2	0
PCNX1	0.126133
CYB561D1	0.12611
VIPAS39	0.126107			Arthrogryposis, renal dysfunction, and cholestasis 2, 613404 (3)
ZMYM4	0.126084
CYP26B1	0.126061			Craniosynostosis with radiohumeral fusions and other skeletal and craniofacial anomalies, 614416 (3)
ZMYND8	0.126056	1	0
NFE2L2	0.126047			Immunodeficiency, developmental delay, and hypohomocysteinemia, 617744 (3)
PAFAH1B2	0.126032	3	0
ZNF638	0.126013
RNPEPL1	0.125975
STK36	0.125973
CDK14	0.125954
IGSF5	0.125927
MEGF8	0.12584			Carpenter syndrome 2, 614976 (3)
ZBTB38	0.125781
BRD4	0.125779	3	0
CNTNAP4	0.125746	2	0
MMRN1	0.125687
MAGEA6	0.125564
ATF7IP	0.12542
CARD10	0.125374
PBX1	0.125336	3	0	Congenital anomalies of kidney and urinary tract syndrome with or without hearing loss, abnormal ears, or developmental delay, 617641 (3)
SDC3	0.125314			{Obesity, association with}, 601665 (3)
CLCA2	0.125283
TMEM131L	0.125224
LRRK2	0.12517			{Parkinson disease 8}, 607060 (3)
SLC26A5	0.125156			?Deafness, autosomal recessive 61, 613865 (3)
HNRNPF	0.125122
NR6A1	0.125029
GABRA1	0.124942			Epileptic encephalopathy, early infantile, 19, 615744 (3), {Epilepsy, childhood absence, susceptibility to, 4}, 611136 (3), {Epilepsy, juvenile myoclonic, susceptibility to, 5}, 611136 (3)
DIS3	0.124865
VAMP2	0.124863		1
GPC5	0.124809
PATL1	0.124677
TSNARE1	0.124393
CDH24	0.124352
PAX3	0.124195			Craniofacial-deafness-hand syndrome, 122880 (3), Rhabdomyosarcoma 2, alveolar, 268220 (3), Waardenburg syndrome, type 1, 193500 (3), Waardenburg syndrome, type 3, 148820 (3)
ARHGEF1	0.124151
EZR	0.124078
TLN2	0.12401
LRRC4	0.124	3	0
EHMT1	0.123964	1	0	Kleefstra syndrome 1, 610253 (3)
ATP2B1	0.123904
MTTP	0.123872
EIF2AK1	0.123843
SNAP25	0.123696	3	0	?Myasthenic syndrome, congenital, 18, 616330 (3)
BPTF	0.123684			Neurodevelopmental disorder with dysmorphic facies and distal limb anomalies, 617755 (3)
SCN11A	0.123636			Episodic pain syndrome, familial, 3, 615552 (3), Neuropathy, hereditary sensory and autonomic, type VII, 615548 (3)
JMJD7-PLA2G4B	0.123613
PLEKHG6	0.123601
ELP1	0.123551
AKNA	0.123504
ZFPM1	0.123466
PLA2G4B	0.123391
DCLK3	0.123278
TCTN2	0.123262			?Meckel syndrome 8, 613885 (3), Joubert syndrome 24, 616654 (3)
POLD1	0.123168			Mandibular hypoplasia, deafness, progeroid features, and lipodystrophy syndrome, 615381 (3), {Colorectal cancer, susceptibility to, 10}, 612591 (3)
SARM1	0.123142
SATB2	0.123055	3	1	Glass syndrome, 612313 (3)
SWSAP1	0.122903
NRBP2	0.122808
RPH3A	0.12275
CBLL1	0.122725
KCND3	0.122624	3	0	Brugada syndrome 9, 616399 (3), Spinocerebellar ataxia 19, 607346 (3)
CPSF3	0.122617
SLC12A6	0.122597			Agenesis of the corpus callosum with peripheral neuropathy, 218000 (3)
SMG8	0.122567
MAP3K11	0.122446
GLRA3	0.122331
CRTC3	0.122289
TUBB4B	0.122283			Leber congenital amaurosis with early-onset deafness, 617879 (3)
TPO	0.122235	3	0	Thrombocythemia 1, 187950 (3), Thyroid dyshormonogenesis 2A, 274500 (3)
HCN4	0.122108			Brugada syndrome 8, 613123 (3), Sick sinus syndrome 2, 163800 (3)
CPT1B	0.122019
EXT1	0.121986	3	0	Chondrosarcoma, 215300 (3), Exostoses, multiple, type 1, 133700 (3)
STUB1	0.121866			Spinocerebellar ataxia, autosomal recessive 16, 615768 (3)
DCAF1	0.121838
SBF2	0.121742			Charcot-Marie-Tooth disease, type 4B2, 604563 (3)
KLHL14	0.121716
DCLK1	0.12166
NTNG1	0.121635	3	1
PCDH1	0.121596
KIF2A	0.121524			Cortical dysplasia, complex, with other brain malformations 3, 615411 (3)
SPON2	0.121501
RIPK1	0.121099
TNS2	0.121006	3	0
ATRX	0.121005	1	0	Alpha-thalassemia myelodysplasia syndrome, somatic, 300448 (3), Alpha-thalassemia/mental retardation syndrome, 301040 (3), Mental retardation-hypotonic facies syndrome, X-linked, 309580 (3)
ENDOU	0.120976
ACTN4	0.120894	3	0	Glomerulosclerosis, focal segmental, 1, 603278 (3)
THSD1	0.120871
NR3C2	0.120753	1	0	Hypertension, early-onset, autosomal dominant, with exacerbation in pregnancy, 605115 (3), Pseudohypoaldosteronism type I, autosomal dominant, 177735 (3)
GABRG2	0.120678			Epilepsy, generalized, with febrile seizures plus, type 3, 611277 (3), Febrile seizures, familial, 8, 611277 (3), {Epilepsy, childhood absence, susceptibility to, 2}, 607681 (3)
CCAR2	0.120675
CD59	0.120625			Hemolytic anemia, CD59-mediated, with or without immune-mediated polyneuropathy, 612300 (3)
NSL1	0.120443
CUX2	0.120417	3	1
VWCE	0.120411
ALDH6A1	0.120389			Methylmalonate semialdehyde dehydrogenase deficiency, 614105 (3)
CYP27B1	0.120376			Vitamin D-dependent rickets, type I, 264700 (3)
GNPTG	0.120364
DICER1	0.120326			Goiter, multinodular 1, with or without Sertoli-Leydig cell tumors, 138800 (3), Pleuropulmonary blastoma, 601200 (3), Rhabdomyosarcoma, embryonal, 2, 180295 (3)
NOTCH4	0.120294
DISC1	0.120278	2	0	{Schizophrenia 9, susceptibility to}, 604906 (3)
DNAH3	0.120216	3	0
INO80	0.120123
ITGA9	0.120089
CEP164	0.120083			Nephronophthisis 15, 614845 (3)
PRMT9	0.120041
PLEKHG1	0.11996
MED23	0.119937			Mental retardation, autosomal recessive 18, 614249 (3)
CIDEC	0.11982			?Lipodystrophy, familial partial, type 5, 615238 (3)
LEMD3	0.119767			Buschke-Ollendorff syndrome, 166700 (3), Osteopoikilosis with or without melorheostosis, 166700 (3)
SYNJ1	0.119752	3	0	Epileptic encephalopathy, early infantile, 53, 617389 (3), Parkinson disease 20, early-onset, 615530 (3)
STIL	0.119693			Microcephaly 7, primary, autosomal recessive, 612703 (3)
PKN1	0.119667
TUB	0.119629			?Retinal dystrophy and obesity, 616188 (3)
DMXL2	0.11937	3	0	?Deafness, autosomal dominant 71, 617605 (3), ?Polyendocrine-polyneuropathy syndrome, 616113 (3)
STAT4	0.119303			{Systemic lupus erythematosus, susceptibility to, 11}, 612253 (3)
NR4A2	0.119178	1	0
PAK6	0.119165
EPHA10	0.119124
RAB11B	0.118927			Neurodevelopmental disorder with ataxic gait, absent speech, and decreased cortical white matter, 617807 (3)
SLC22A23	0.11892
EXT2	0.118657			?Seizures, scoliosis, and macrocephaly syndrome, 616682 (3), Exostoses, multiple, type 2, 133701 (3)
STK32C	0.118587
IL21R	0.118533			Immunodeficiency 56, 615207 (3), [IgE, elevated level of], 147050 (3)
PITPNM3	0.118416			Cone-rod dystrophy 5, 600977 (3)
RAD18	0.118391
RGS12	0.118386
MAMDC4	0.118371
DUSP6	0.118336			Hypogonadotropic hypogonadism 19 with or without anosmia, 615269 (3)
ELMO3	0.118335
LRP3	0.118297
WDR35	0.118239			Cranioectodermal dysplasia 2, 613610 (3), Short-rib thoracic dysplasia 7 with or without polydactyly, 614091 (3)
SOGA3	0.118074
NCDN	0.117964
POMGNT2	0.117943			Muscular dystrophy-dystroglycanopathy (congenital with brain and eye anomalies, type A, 8, 614830 (3)
PDE4D	0.117941			Acrodysostosis 2, with or without hormone resistance, 614613 (3), {Stroke, susceptibility to, 1}, 606799 (3)
EZH2	0.117932			Weaver syndrome, 277590 (3)
GGNBP2	0.117905	2	0
CACNA1S	0.117846			Hypokalemic periodic paralysis, type 1, 170400 (3), {Malignant hyperthermia susceptibility 5}, 601887 (3), {Thyrotoxic periodic paralysis, susceptibility to, 1}, 188580 (3)
TUT7	0.117835
ST14	0.117798			Ichthyosis, congenital, autosomal recessive 11, 602400 (3)
A2ML1	0.117659
RBM12	0.117564			{Schizophrenia 19, susceptibility to}, 617629 (3)
ITGA5	0.117549
LTBP1	0.117533
KDM6A	0.117438	2	0	Kabuki syndrome 2, 300867 (3)
CEP192	0.117325
GCN1	0.117252
LIPT2	0.117209			Encephalopathy, neonatal severe, with lactic acidosis and brain abnormalities, 617668 (3)
GRM6	0.117197			Night blindness, congenital stationary (complete), 1B, autosomal recessive, 257270 (3)
POLA2	0.117183	3	0
ARFGAP2	0.117172
CFAP46	0.116913
DCDC1	0.116906
DCAF7	0.11682
TRPM7	0.116719			{Amyotrophic lateral sclerosis-parkinsonism/dementia complex, susceptibility to}, 105500 (3)
R3HDM4	0.116693
SIRT1	0.116673
DPP6	0.116659	3	0	Mental retardation, autosomal dominant 33, 616311 (3), {Ventricular fibrillation, paroxysmal familial, 2}, 612956 (3)
EFR3B	0.116553
GOLGA4	0.116477
DNM1	0.116451			Epileptic encephalopathy, early infantile, 31, 616346 (3)
EYA1	0.116445			?Otofaciocervical syndrome, 166780 (3), Anterior segment anomalies with or without cataract, 602588 (3), Branchiootic syndrome 1, 602588 (3), Branchiootorenal syndrome 1, with or without cataracts, 113650 (3)
MYH10	0.116436	2	0
ALG13	0.116387			?Congenital disorder of glycosylation, type Is, 300884 (3), Epileptic encephalopathy, early infantile, 36, 300884 (3)
PSME4	0.116371
MMS22L	0.116343
AKR1C2	0.116323			46XY sex reversal 8, 614279 (3)
GRIN2C	0.116313
HSD3B1	0.116309
ACAD10	0.116276
MEFV	0.116202			Familial Mediterranean fever, AD, 134610 (3), Familial Mediterranean fever, AR, 249100 (3)
ABL2	0.116179			Leukemia, acute myeloid, with eosinophilia (1)
KIAA0586	0.116177			Joubert syndrome 23, 616490 (3), Short-rib thoracic dysplasia 14 with polydactyly, 616546 (3)
DDAH1	0.11609
CLASP2	0.116052
PODN	0.116015
POLG	0.116008			Mitochondrial DNA depletion syndrome 4A (Alpers type), 203700 (3), Mitochondrial DNA depletion syndrome 4B (MNGIE type), 613662 (3), Mitochondrial recessive ataxia syndrome (includes SANDO and SCAE), 607459 (3), Progressive external ophthalmoplegia, autosomal dominant 1, 157640 (3), Progressive external ophthalmoplegia, autosomal recessive 1, 258450 (3)
NRAP	0.115977
WDR45	0.115813			Neurodegeneration with brain iron accumulation 5, 300894 (3)
RTL1	0.115791
MPO	0.115746			Myeloperoxidase deficiency, 254600 (3), {Alzheimer disease, susceptibility to}, 104300 (3), {Lung cancer, protection against, in smokers} (3)
ATG2A	0.115727
PRPF18	0.115634
ANKRD35	0.11522
MPP6	0.114916	3	0
PSMG4	0.114916
SCN10A	0.114868			Episodic pain syndrome, familial, 2, 615551 (3)
GPR146	0.114854
LAMB3	0.114818			Amelogenesis imperfecta, type IA, 104530 (3), Epidermolysis bullosa, junctional, Herlitz type, 226700 (3), Epidermolysis bullosa, junctional, non-Herlitz type, 226650 (3)
OPALIN	0.114723
TPK1	0.114696			Thiamine metabolism dysfunction syndrome 5 (episodic encephalopathy type), 614458 (3)
ERBIN	0.114688	2	0
PHF12	0.114627	1	0
ZNF219	0.114587
PML	0.114481			Leukemia, acute promyelocytic, PML/RARA type (3)
SLC9C2	0.114456
MCF2L2	0.114456
CAND2	0.114284
NAA10	0.11406			?Microphthalmia, syndromic 1, 309800 (3), Ogden syndrome, 300855 (3)
NKX2-1	0.11402			Chorea, hereditary benign, 118700 (3), Choreoathetosis, hypothyroidism, and neonatal respiratory distress, 610978 (3), {Thyroid cancer, nonmedullary, 1}, 188550 (3)
DAG1	0.114019			Muscular dystrophy-dystroglycanopathy (congenital with brain and eye anomalies), type A, 9, 616538 (3), Muscular dystrophy-dystroglycanopathy (limb-girdle), type C, 9, 613818 (3)
MUC3A	0.113993
PUM2	0.113957
SLC5A6	0.113903
KRTAP9-3	0.11376
AKAP1	0.113709
INPP5B	0.113639
KHK	0.113501			[Fructosuria], 229800 (3)
ARHGEF5	0.113408
FMNL3	0.113358
TRPV5	0.113342
PIWIL4	0.113322
SETX	0.113223			Amyotrophic lateral sclerosis 4, juvenile, 602433 (3), Spinocerebellar ataxia, autosomal recessive 1, 606002 (3)
GABRD	0.113212			{Epilepsy, generalized, with febrile seizures plus, type 5, susceptibility to}, 613060 (3), {Epilepsy, idiopathic generalized, 10}, 613060 (3), {Epilepsy, juvenile myoclonic, susceptibility to}, 613060 (3)
HDLBP	0.113174	1	0
ADARB1	0.113112
COLEC12	0.112932
CFAP45	0.112894
GRN	0.112824			Aphasia, primary progressive, 607485 (3), Ceroid lipofuscinosis, neuronal, 11, 614706 (3), Frontotemporal lobar degeneration with ubiquitin-positive inclusions, 607485 (3)
CUL9	0.11271
NCAPD2	0.112588			?Microcephaly 21, primary, autosomal recessive, 617983 (3)
DHX9	0.112523
XPO5	0.11251
ADGRA3	0.112366
RIC8B	0.112347
SOS1	0.112265			?Fibromatosis, gingival, 1, 135300 (3), Noonan syndrome 4, 610733 (3)
MMP3	0.112189			{Coronary heart disease, susceptibility to, 6}, 614466 (3)
CTC1	0.112141			Cerebroretinal microangiopathy with calcifications and cysts, 612199 (3)
ZNF460	0.11205
CCDC168	0.112035
TMEM201	0.111958
OR5T2	0.111871
PLOD3	0.11181			Lysyl hydroxylase 3 deficiency, 612394 (3)
ANK1	0.111805			Spherocytosis, type 1, 182900 (3)
TCAF2	0.111793
DNAAF5	0.111781			Ciliary dyskinesia, primary, 18, 614874 (3)
PTGES	0.11177
PHF3	0.111709	1	0
COL23A1	0.111708
POM121	0.111687
ADAMTS17	0.11157			Weill-Marchesani 4 syndrome, recessive, 613195 (3)
ZBTB46	0.111499
SKIL	0.11148
CLCN4	0.111354	3	1	Mental retardation, X-linked 49/15, 300114 (3)
RBM20	0.111321			Cardiomyopathy, dilated, 1DD, 613172 (3)
ZC3H3	0.111227
CORO1C	0.111216
KIAA1522	0.111147
SV2A	0.111082
AFAP1L1	0.111078
IMPDH2	0.111021			[IMPDH2 enzyme activity, variation in], 617995 (3)
LGALS3BP	0.11102
MCOLN3	0.110998
MCM8	0.11093			?Premature ovarian failure 10, 612885 (3)
NDRG4	0.110861
GABBR2	0.110824	3	1	Epileptic encephalopathy, early infantile, 59, 617904 (3), Neurodevelopmental disorder with poor language and loss of hand skills, 617903 (3), {Nicotine dependence, protection against}, 188890 (3), {Nicotine dependence, susceptibility to}, 188890 (3)
THSD7B	0.110747
FANCD2	0.110733			Fanconi anemia, complementation group D2, 227646 (3)
EPHB4	0.110684			{Hydrops fetalis, nonimmune, and/or atrial septal defect}, 617300 (3)
IGSF9	0.110612
SIN3B	0.110557
LIG1	0.110507
CHD1	0.110486	3	1	Pilarowski-Bjornsson syndrome, 617682 (3)
SNAP91	0.110393
TECTA	0.110288	3	0	Deafness, autosomal dominant 8/12, 601543 (3), Deafness, autosomal recessive 21, 603629 (3)
RIC3	0.110265
WNK4	0.110204			Pseudohypoaldosteronism, type IIB, 614491 (3)
RTTN	0.110175			Microcephaly, short stature, and polymicrogyria with seizures, 614833 (3)
TBR1	0.110162	1	0
RUNDC1	0.110111
RBM47	0.110108
RGL1	0.110016
CLIP2	0.109898	3	0
TXNRD1	0.109756
DLX3	0.109714	2	0	Amelogenesis imperfecta, type IV, 104510 (3), Trichodontoosseous syndrome, 190320 (3)
UBASH3B	0.109646
HSP90AA1	0.109625
SUPT6H	0.109574
SLC22A9	0.10957	3	0
SPSB1	0.109549
SLC25A46	0.109431			Neuropathy, hereditary motor and sensory, type VIB, 616505 (3)
TBCD	0.1094			Encephalopathy, progressive, early-onset, with brain atrophy and thin corpus callosum, 617193 (3)
BMP3	0.109382
LLGL1	0.109353
FHOD3	0.109306
TAOK3	0.109281
SF1	0.109259			46, XX sex reversal 4, 617480 (3), 46XY sex reversal 3, 612965 (3), Adrenocortical insufficiency, 612964 (3), Premature ovarian failure 7, 612964 (3), Spermatogenic failure 8, 613957 (3)
AP3B2	0.109244			Epileptic encephalopathy, early infantile, 48, 617276 (3)
IQGAP2	0.109199
FRMPD4	0.109161		1	Mental retardation, X-linked 104, 300983 (3)
S1PR4	0.109159
TCERG1L	0.109062
CEP95	0.108735
WDR62	0.108691			Microcephaly 2, primary, autosomal recessive, with or without cortical malformations, 604317 (3)
LCMT2	0.108552
PPP1R12A	0.108551
TIE1	0.108474
ATP11A	0.108355
TNFRSF14	0.108272
NPAS1	0.108235
PI4K2B	0.108222
ZNF76	0.10814
IFT81	0.108091			Short-rib thoracic dysplasia 19 with or without polydactyly, 617895 (3)
DNAH2	0.107954
DHRS2	0.107907
CYP26A1	0.107906
TUBGCP2	0.107603
PPP6R1	0.107551
FBXL6	0.107441
MAP4	0.107393
SRPK3	0.107294
CD151	0.107288			Nephropathy with pretibial epidermolysis bullosa and deafness, 609057 (3), [Blood group, Raph], 179620 (3)
FGFR4	0.107259			{Cancer progression/metastasis} (3)
ZNF445	0.107243
ARHGEF4	0.107209
SAMD9	0.107072			MIRAGE syndrome, 617053 (3), Tumoral calcinosis, familial, normophosphatemic, 610455 (3)
FREM2	0.106995			Fraser syndrome 2, 617666 (3)
TCF12	0.106946			Craniosynostosis 3, 615314 (3)
GRAMD1B	0.10687
REXO1	0.106868
INTS10	0.106788
LTA4H	0.106777
CCT4	0.106604	2	0
FBXL16	0.106576
FAM92B	0.106567	2	0
CNST	0.106546
TRPC6	0.106459	2	0	Glomerulosclerosis, focal segmental, 2, 603965 (3)
ADAMTSL5	0.106395
PHTF2	0.106296
MICAL2	0.10625
PLG	0.106239			Dysplasminogenemia, 217090 (3), Plasminogen deficiency, type I, 217090 (3)
ZYX	0.106207
TDRD1	0.10619
IQCE	0.106188			?Polydactyly, postaxial, type A7, 617642 (3)
CCDC88C	0.106175	3	0	?Spinocerebellar ataxia 40, 616053 (3), Hydrocephalus, nonsyndromic, autosomal recessive, 236600 (3)
MYO9A	0.106139
ARHGEF18	0.105966			Retinitis pigmentosa 78, 617433 (3)
CNTROB	0.105963
AGFG2	0.10593
LSAMP	0.105907
BCL11A	0.10586	1	0	Dias-Logan syndrome, 617101 (3)
STK19	0.105776
FZD10	0.105721
ATAD5	0.10567
MDN1	0.105306
CACNA1C	0.105261	1	0	Brugada syndrome 3, 611875 (3), Timothy syndrome, 601005 (3)
PAX4	0.105243			Diabetes mellitus, type 2, 125853 (3), Maturity-onset diabetes of the young, type IX, 612225 (3), {Diabetes mellitus, ketosis-prone, susceptibility to}, 612227 (3)
CA9	0.105157
CD22	0.105082
JUP	0.104991			Arrhythmogenic right ventricular dysplasia 12, 611528 (3), Naxos disease, 601214 (3)
LINGO1	0.104969
DVL1	0.104952			Robinow syndrome, autosomal dominant 2, 616331 (3)
RSPH6A	0.104907
ATP6V1A	0.104798
CARMIL3	0.104634
B3GALT2	0.104519
RFX8	0.104513
YIF1B	0.104501
SHISA6	0.104414
TDRP	0.104321
INCENP	0.104314
SNX33	0.10417
IDO2	0.104125
RNF43	0.104091			Sessile serrated polyposis cancer syndrome, 617108 (3)
TEX15	0.104061			Spermatogenic failure 25, 617960 (3)
NLRP6	0.104014
SF3B2	0.103997
ITGAV	0.103984
DDX60	0.103971
CR1	0.103917			CR1 deficiency (1), [Blood group, Knops system], 607486 (3), {?SLE susceptibility} (1), {Malaria, severe, resistance to}, 611162 (3)
TNKS	0.103865
TMBIM1	0.103845
ZNF777	0.103843
ZNF233	0.103767
MTERF4	0.103498
GOLGA5	0.103427
SLIT2	0.103321
SCUBE1	0.103203
TTLL5	0.103196			Cone-rod dystrophy 19, 615860 (3)
ASCC3	0.103145
ATP6V0A1	0.103134
GATA4	0.103044			?Testicular anomalies with or without congenital heart disease, 615542 (3), Atrial septal defect 2, 607941 (3), Atrioventricular septal defect 4, 614430 (3), Tetralogy of Fallot, 187500 (3), Ventricular septal defect 1, 614429 (3)
AKAP12	0.102965
PCDHB16	0.102834
IRF8	0.102829			Immunodeficiency 32A, mycobacteriosis, autosomal dominant, 614893 (3), Immunodeficiency 32B, monocyte and dendritic cell deficiency, autosomal recessive, 226990 (3)
PLEKHA4	0.102814
ARMC3	0.102707
FAM47B	0.102599
PTPRM	0.102579
DNAJC13	0.10256
NCAPG2	0.102442
TRPM2	0.102365
FAM160B2	0.102347
GTF2IRD1	0.102333
ZNF175	0.102274
ULK1	0.102065
MSH6	0.102055			Colorectal cancer, hereditary nonpolyposis, type 5, 614350 (3), Endometrial cancer, familial, 608089 (3), Mismatch repair cancer syndrome, 276300 (3)
SEPTIN10	0.101987
CALR	0.101939			Myelofibrosis, somatic, 254450 (3), Thrombocythemia, somatic, 187950 (3)
HIBCH	0.101925			3-hydroxyisobutryl-CoA hydrolase deficiency, 250620 (3)
OR2M5	0.101887
SMCHD1	0.101865			Bosma arhinia microphthalmia syndrome, 603457 (3), Fascioscapulohumeral muscular dystrophy 2, digenic, 158901 (3)
EIF2AK3	0.101853			Wolcott-Rallison syndrome, 226980 (3)
MPPED2	0.101803
SMPD4	0.101709
DIAPH3	0.101653			Auditory neuropathy, autosomal dominant, 1, 609129 (3)
DOCK6	0.10151			Adams-Oliver syndrome 2, 614219 (3)
TONSL	0.101498
CEP63	0.101412			?Seckel syndrome 6, 614728 (3)
SNX5	0.101365	2	0
RGMA	0.101316
TCTN3	0.101258			Joubert syndrome 18, 614815 (3), Orofaciodigital syndrome IV, 258860 (3)
HMGCL	0.10119			HMG-CoA lyase deficiency, 246450 (3)
MOCOS	0.101162			Xanthinuria, type II, 603592 (3)
TRIM13	0.101135
FSD1	0.101029
ABCB9	0.100971
MGAT4C	0.100943
OR52N1	0.100884
DOP1A	0.100869
HK1	0.100766			Hemolytic anemia due to hexokinase deficiency, 235700 (3), Neuropathy, hereditary motor and sensory, Russe type, 605285 (3), Retinitis pigmentosa 79, 617460 (3)
PI16	0.100519
SAMD9L	0.100469			Ataxia-pancytopenia syndrome, 159550 (3)
ATM	0.100447			Ataxia-telangiectasia, 208900 (3), Lymphoma, B-cell non-Hodgkin, somatic (3), Lymphoma, mantle cell, somatic (3), T-cell prolymphocytic leukemia, somatic (3), {Breast cancer, susceptibility to}, 114480 (3)
JCAD	0.100395
NAT8L	0.100183			?N-acetylaspartate deficiency, 614063 (3)
FAM120B	0.100141
RDH8	0.0999523
CRACD	0.0998572
NLRP3	0.0998395			CINCA syndrome, 607115 (3), Deafness, autosomal dominant 34, with or without inflammation, 617772 (3), Familial cold inflammatory syndrome 1, 120100 (3), Keratoendothelitis fugax hereditaria, 148200 (3), Muckle-Wells syndrome, 191900 (3)
SELENOO	0.0997381
RNF214	0.0997006
DCAF4L2	0.0995702
DYRK1A	0.0994459	1	0	Mental retardation, autosomal dominant 7, 614104 (3)
KRT86	0.0994428			Monilethrix, 158000 (3)
EXOSC3	0.0994218			Pontocerebellar hypoplasia, type 1B, 614678 (3)
CNGA3	0.0993723			Achromatopsia 2, 216900 (3)
SIGLEC1	0.0993709
FSIP2	0.0993402
FAM174B	0.0993179
LRATD1	0.0992557
GOLGA6L2	0.0992408
VCAN	0.0991748			Wagner syndrome 1, 143200 (3)
PKD1L1	0.0991492			Heterotaxy, visceral, 8, autosomal, 617205 (3)
ZC3H4	0.0991353	2	0
ENPP2	0.0990266
FBXL14	0.0990207
SSC5D	0.0990003
EVC2	0.0989924			Ellis-van Creveld syndrome, 225500 (3), Weyers acrofacial dysostosis, 193530 (3)
PEPD	0.0989151			Prolidase deficiency, 170100 (3)
OR4K5	0.0988925
CAPN12	0.0988286	3	0
TRPV3	0.0987819			?Palmoplantar keratoderma, nonepidermolytic, focal 2, 616400 (3), Olmsted syndrome, 614594 (3)
CPZ	0.0986767	3	0
SLC23A1	0.0986304
P2RX1	0.0985397
HDAC9	0.0985173
SLFN5	0.0984293
LYSMD4	0.09839
SLC9A2	0.0983611
DEAF1	0.0983266	1	0	?Dyskinesia, seizures, and intellectual developmental disorder, 617171 (3), Mental retardation, autosomal dominant 24, 615828 (3)
KRBA1	0.0982116
NPFFR2	0.098097
CXCR6	0.0980765
LTB4R2	0.0979618
GPN1	0.097797
ARHGAP32	0.0976997	3	0
NUP133	0.0976438	3	0
ARHGEF17	0.0975364
TRA2A	0.0975295
NOS3	0.0975272			{Alzheimer disease, late-onset, susceptibility to}, 104300 (3), {Coronary artery spasm 1, susceptibility to} (3), {Hypertension, pregnancy-induced}, 189800 (3), {Hypertension, susceptibility to}, 145500 (3), {Ischemic stroke, susceptibility to}, 601367 (3), {Placental abruption} (3)
COL27A1	0.0974427			?Steel syndrome, 615155 (3)
DNAH14	0.0973366
NAIF1	0.0973291
CASC1	0.0972166
DUOX2	0.097177			Thyroid dyshormonogenesis 6, 607200 (3)
SPG11	0.0970486			Amyotrophic lateral sclerosis 5, juvenile, 602099 (3), Charcot-Marie-Tooth disease, axonal, type 2X, 616668 (3), Spastic paraplegia 11, autosomal recessive, 604360 (3)
RUNDC3A	0.0968408
LRFN2	0.0968298	3	0
ABCG2	0.0966282			[Junior blood group system], 614490 (3), [Uric acid concentration, serum, QTL1], 138900 (3)
LRPAP1	0.0965231			Myopia 23, autosomal recessive, 615431 (3)
ALPK3	0.0963566
PCDH19	0.0963113	1	0	Epileptic encephalopathy, early infantile, 9, 300088 (3)
FICD	0.0962781
NRP1	0.0961583
NAV2	0.0961048	2	0
UBTF	0.0960913			Neurodegeneration, childhood-onset, with brain atrophy, 617672 (3)
NCOR1	0.0960082	2	0
VNN2	0.0959179
PCOLCE2	0.0958381
IGFBP7	0.0957308			Retinal arterial macroaneurysm with supravalvular pulmonic stenosis, 614224 (3)
DNTT	0.0955819
IL27RA	0.0955698
TBRG1	0.0955336
EGFR	0.0955165			?Inflammatory skin and bowel disease, neonatal, 2, 616069 (3), Adenocarcinoma of lung, response to tyrosine kinase inhibitor in, 211980 (3), Nonsmall cell lung cancer, response to tyrosine kinase inhibitor in, 211980 (3), {Nonsmall cell lung cancer, susceptibility to}, 211980 (3)
PACC1	0.095481
RANGAP1	0.0954228
KIF2B	0.0954031
NAGS	0.0952545			N-acetylglutamate synthase deficiency, 237310 (3)
CHD1L	0.0951491
OAF	0.0950199
LRR1	0.0948992
ITGA3	0.0947311			Interstitial lung disease, nephrotic syndrome, and epidermolysis bullosa, congenital, 614748 (3)
MYB	0.0947074			{T-cell acute lymphoblastic leukemia} (3)
SRPRA	0.0946018	1	0
SCN4A	0.0945136	3	0	Hyperkalemic periodic paralysis, type 2, 170500 (3), Hypokalemic periodic paralysis, type 2, 613345 (3), Myasthenic syndrome, congenital, 16, 614198 (3), Myotonia congenita, atypical, acetazolamide-responsive, 608390 (3), Paramyotonia congenita, 168300 (3)
RIMS2	0.0944406	3	1
THEMIS	0.0943563
ZNF90	0.0943469
ZNF382	0.0943087
RAI1	0.0941805	1	0	Smith-Magenis syndrome, 182290 (3)
EPPK1	0.0941326	3	0
PLEKHG2	0.0940849			Leukodystrophy and acquired microcephaly with or without dystonia, 616763 (3)
CDH5	0.0940623
CDRT1	0.0940233
ASB14	0.0939497	3	0
HCAR2	0.0938812
TP53BP1	0.0937604
KIFC3	0.0937474
PPIAL4A	0.0936781
MIEN1	0.0936237
KIDINS220	0.0936193			Spastic paraplegia, intellectual disability, nystagmus, and obesity, 617296 (3)
LYRM9	0.0936153
ALDH1L1	0.0934926
PDIA4	0.0933434
TTLL2	0.0933118
CARD11	0.0929552	3	0	B-cell expansion with NFKB and T-cell anergy, 616452 (3), Immunodeficiency 11A, 615206 (3), Immunodeficiency 11B with atopic dermatitis, 617638 (3)
ZNF362	0.0928781
RBSN	0.0928205
PIEZO2	0.092751			?Marden-Walker syndrome, 248700 (3), Arthrogryposis, distal, type 3, 114300 (3), Arthrogryposis, distal, type 5, 108145 (3), Arthrogryposis, distal, with impaired proprioception and touch, 617146 (3)
ECD	0.0927492
TBC1D2	0.0927171
TRMT1L	0.0926022
SON	0.0925754	1	0	ZTTK syndrome, 617140 (3)
ZNF568	0.0925614
FCRL5	0.0925166
MANSC1	0.0924469
SGPP1	0.0924319
SEC31A	0.0923016
OR6Q1	0.092053
ELL	0.0920038
PRRC1	0.0919931
KIAA0100	0.0919605
ANKAR	0.0918007
PAPLN	0.0917782
SOX10	0.0917539			PCWH syndrome, 609136 (3), Waardenburg syndrome, type 2E, with or without neurologic involvement, 611584 (3), Waardenburg syndrome, type 4C, 613266 (3)
CLIC6	0.091723
EFR3A	0.0916673	2	0
ZSCAN29	0.0916506
COL28A1	0.0915554	3	0
DNAJC27	0.0915211
UVSSA	0.091351			UV-sensitive syndrome 3, 614640 (3)
GNA11	0.0913474			Hypocalcemia, autosomal dominant 2, 615361 (3), Hypocalciuric hypercalcemia, type II, 145981 (3)
TCFL5	0.0913438
SRSF3	0.0913428
KIF5B	0.0912913
SCAF4	0.0912561	2	0
HTR2B	0.0911907
ZKSCAN5	0.0910096
NIBAN2	0.0908947
TMEM41A	0.0908862
FAM184A	0.0907884
IFIH1	0.0906403			Aicardi-Goutieres syndrome 7, 615846 (3), Singleton-Merten syndrome 1, 182250 (3)
MAP3K7	0.0905738			Cardiospondylocarpofacial syndrome, 157800 (3), Frontometaphyseal dysplasia 2, 617137 (3)
F2	0.0904552			Dysprothrombinemia, 613679 (3), Hypoprothrombinemia, 613679 (3), Thrombophilia due to thrombin defect, 188050 (3), {Pregnancy loss, recurrent, susceptibility to, 2}, 614390 (3), {Stroke, ischemic, susceptibility to}, 601367 (3)
DYSF	0.0904337			Miyoshi muscular dystrophy 1, 254130 (3), Muscular dystrophy, limb-girdle, type 2B, 253601 (3), Myopathy, distal, with anterior tibial onset, 606768 (3)
AQP12A	0.0903825
NCOA2	0.0902759
CDON	0.0901519	3	0	Holoprosencephaly 11, 614226 (3)
MECP2	0.0897436	1	0	Encephalopathy, neonatal severe, 300673 (3), Mental retardation, X-linked syndromic, Lubs type, 300260 (3), Mental retardation, X-linked, syndromic 13, 300055 (3), Rett syndrome, 312750 (3), Rett syndrome, atypical, 312750 (3), Rett syndrome, preserved speech variant, 312750 (3), {Autism susceptibility, X-linked 3}, 300496 (3)
ATP5F1C	0.0896515
CD274	0.0896152
CDH20	0.0894858
RCOR2	0.0893308
ZRANB3	0.0892633
SPATA32	0.0892524
MGA	0.0891614
NAV1	0.0891613
TBC1D31	0.0890175	2	0
SHOX	0.0889676	2	0	Langer mesomelic dysplasia, 249700 (3), Leri-Weill dyschondrosteosis, 127300 (3), Short stature, idiopathic familial, 300582 (3)
MICAL3	0.0889658
MEDAG	0.08892
MAST4	0.0889175
EIF3J	0.0889067
DCAF13	0.0887999
MGAT5B	0.0887515
IMPACT	0.0887209
PALM2AKAP2	0.0885567
RPL4	0.0885322
ZNF662	0.0885136
PI4KA	0.0884787			Polymicrogyria, perisylvian, with cerebellar hypoplasia and arthrogryposis, 616531 (3)
AKAP2	0.0884553
PUS7	0.088414
TTC39A	0.0884085
CD79A	0.0883763			Agammaglobulinemia 3, 613501 (3)
RABGGTB	0.088373
ZNF804A	0.0883353	2	0
RAB43	0.0882567	2	0
IK	0.0881751
CPA5	0.0881368
CEP135	0.0880932	2	0	Microcephaly 8, primary, autosomal recessive, 614673 (3)
NPTN	0.0880388
HNRNPU	0.0879901	1	0	Epileptic encephalopathy, early infantile, 54, 617391 (3)
MTR	0.087916			Homocystinuria-megaloblastic anemia, cblG complementation type, 250940 (3), {Neural tube defects, folate-sensitive, susceptibility to}, 601634 (3)
IL7R	0.0879141			Severe combined immunodeficiency, T-cell negative, B-cell/natural killer cell-positive type, 608971 (3)
FAXC	0.0878835
KCNS1	0.0878357
GPR179	0.087665			Night blindness, congenital stationary (complete), 1E, autosomal recessive, 614565 (3)
FOXK1	0.0876369
PRRC2B	0.087445
PRKCE	0.0873887
ZNF606	0.087362
TPBG	0.0872362
ITK	0.0871769			Lymphoproliferative syndrome 1, 613011 (3)
FRMPD1	0.0871003
TYRO3	0.0869767
LAMB4	0.0869267
WARS2	0.0868402			Neurodevelopmental disorder, mitochondrial, with abnormal movements and lactic acidosis, with or without seizures, 617710 (3)
PFKP	0.0868259
ANKRD50	0.0867795
PRPH	0.0867529			Choroidal dystrophy, central areolar 2, 613105 (3), Leber congenital amaurosis 18, 608133 (3), Macular dystrophy, patterned, 1, 169150 (3), Macular dystrophy, vitelliform, 3, 608161 (3), Retinitis pigmentosa 7 and digenic, 608133 (3), Retinitis punctata albescens, 136880 (3), {Amyotrophic lateral sclerosis, susceptibility to}, 105400 (3)
DENND5B	0.0867239
PRMT8	0.0867213
AOC2	0.0867003
SCYL1	0.086671			Spinocerebellar ataxia, autosomal recessive 21, 616719 (3)
IGBP1	0.0866032			Corpus callosum, agenesis of, with mental retardation, ocular coloboma and micrognathia, 300472 (3)
GAREM2	0.0865799
MARK2	0.0865019
HNRNPUL1	0.0864987
KCTD1	0.0864891			Scalp-ear-nipple syndrome, 181270 (3)
COP1	0.0862659
NHSL1	0.0862227
LRRC40	0.0861744
ZNF711	0.0861368			Mental retardation, X-linked 97, 300803 (3)
DEPDC1B	0.0861136
PRDM7	0.0860778
KIRREL2	0.0859119
TCTE1	0.0858882
FRMD1	0.0858859
TMEM42	0.0858824
GUCY1A1	0.0858045
MGAM	0.0857582
EMC4	0.0857303
STEAP2	0.0856677
MPRIP	0.0856303
NOC2L	0.0855145
TKTL2	0.0855106
MAP3K1	0.0854536			46XY sex reversal 6, 613762 (3)
HEPACAM	0.0854419		1	Megalencephalic leukoencephalopathy with subcortical cysts 2A, 613925 (3), Megalencephalic leukoencephalopathy with subcortical cysts 2B, remitting, with or without mental retardation, 613926 (3)
XYLT2	0.0853808			Spondyloocular syndrome, 605822 (3), {Pseudoxanthoma elasticum, modifier of severity of}, 264800 (3)
MAPK11	0.0852704
RNF146	0.0852327
CASS4	0.0851766
GPR150	0.0851761
CDADC1	0.0849783
ZNF366	0.0849698
GSKIP	0.084877
CRYGD	0.0848731			Cataract 4, multiple types, 115700 (3)
ARPC1A	0.0848562
PMPCB	0.0848374			Multiple mitochondrial dysfunctions syndrome 6, 617954 (3)
UCHL5	0.0847978
OCLN	0.0847678			Pseudo-TORCH syndrome 1, 251290 (3)
EFHD1	0.0847202
PARPBP	0.0846815
JPH4	0.0846759
TRAPPC11	0.084479			Muscular dystrophy, limb-girdle, type 2S, 615356 (3)
PAPSS2	0.0844494			Brachyolmia 4 with mild epiphyseal and metaphyseal changes, 612847 (3)
PPFIA4	0.0843923
ANKS6	0.084382			Nephronophthisis 16, 615382 (3)
PGA5	0.0843745
EPHA4	0.0843724
CCDC91	0.0843633	3	0
DMPK	0.0843578	1	0	Myotonic dystrophy 1, 160900 (3)
TEKT3	0.0843334
TRPC5	0.0843207
RNASE9	0.0841749
PTGR1	0.0840822
TRPM6	0.0839401			Hypomagnesemia 1, intestinal, 602014 (3)
USP45	0.083936	2	0
ATP10B	0.0838971
OR5M8	0.0838731
TPR	0.0838611
PRPSAP2	0.0837729
DMP1	0.0837567			Hypophosphatemic rickets, AR, 241520 (3)
TMEM63C	0.0837027
BTBD11	0.0835542
KRT76	0.0835444
RPL3L	0.0834961
ELK1	0.0834747
FOXM1	0.0833302
GZF1	0.0833263			Joint laxity, short stature, and myopia, 617662 (3)
NUTM2A	0.0832762
PREX1	0.0832359	2	0
GPR1	0.0832211
ADGRG5	0.0831835
ILDR2	0.0831606
PPFIBP2	0.0831047
NUMB	0.0830786
DLEC1	0.0830568			Esophageal cancer, 133239 (1), Lung cancer, 211980 (1)
SLC26A1	0.0830456			?Nephrolithiasis, calcium oxalate, 167030 (3)
LAMB2	0.0830045			Nephrotic syndrome, type 5, with or without ocular abnormalities, 614199 (3), Pierson syndrome, 609049 (3)
LTBP4	0.082983			Cutis laxa, autosomal recessive, type IC, 613177 (3)
NHS	0.0829539			Cataract 40, X-linked, 302200 (3), Nance-Horan syndrome, 302350 (3)
AKAP4	0.0829378
TCF7L2	0.0829031	1	0	{Diabetes mellitus, type 2, susceptibility to}, 125853 (3)
SLC35G2	0.082816
TTC14	0.082768
POU3F1	0.0826244
CDH23	0.0825467			Deafness, autosomal recessive 12, 601386 (3), Usher syndrome, type 1D, 601067 (3), Usher syndrome, type 1D/F digenic, 601067 (3), {Pituitary adenoma 5, multiple types}, 617540 (3)
KAT2B	0.082543	2	0
AURKB	0.082536
ADAM12	0.0824724
WARS1	0.0822627
HELB	0.0822547
IRGC	0.0822232
SPIN3	0.082212
SNRNP200	0.0821787			Retinitis pigmentosa 33, 610359 (3)
MAP3K4	0.082161
ADCY10	0.0820891			{Hypercalciuria, absorptive, susceptibility to}, 143870 (3)
ZXDC	0.0820668
ARHGEF15	0.0819946
PNPLA2	0.0819728			Neutral lipid storage disease with myopathy, 610717 (3)
SHANK1	0.0819617	2	0
TMTC1	0.0819356
PIK3IP1	0.0819252
PDSS2	0.081881			Coenzyme Q10 deficiency, primary, 3, 614652 (3)
EGF	0.0818578			Hypomagnesemia 4, renal, 611718 (3)
SIK3	0.0817834
PHYHIP	0.081733
SORCS2	0.0817282
CTSF	0.0817083			Ceroid lipofuscinosis, neuronal, 13, Kufs type, 615362 (3)
CEP76	0.081676
ZNF253	0.0816585
RBPJL	0.0816063
NEK9	0.0814681			?Arthrogryposis, Perthes disease, and upward gaze palsy, 614262 (3), Lethal congenital contracture syndrome 10, 617022 (3), Nevus comedonicus, somatic, 617025 (3)
TTLL7	0.0814473
CHRNA4	0.0813688			Epilepsy, nocturnal frontal lobe, 1, 600513 (3), {Nicotine addiction, susceptibility to}, 188890 (3)
NKX1-2	0.0813369
ENOX1	0.0813348
LTBP2	0.0812851			?Weill-Marchesani syndrome 3, recessive, 614819 (3), Dental anomalies and short stature, 601216 (3), Geleophysic dysplasia 3, 617809 (3), Glaucoma 3, primary congenital, D, 613086 (3), Microspherophakia and/or megalocornea, with ectopia lentis and with or without secondary glaucoma, 251750 (3)
MCAM	0.0812435
SLC25A29	0.0812294
TM6SF1	0.0811314
WASL	0.0811196
PPOX	0.0810833			Porphyria variegata, 176200 (3)
BID	0.0810814
SNAPC3	0.080987
VGLL2	0.0809436
NR4A1	0.0809011
ATP13A4	0.0808648
FCRLA	0.0808293
ACP7	0.080787
BNC2	0.0807605
PHYHD1	0.0807247
PDGFRA	0.0806216			Gastrointestinal stromal tumor, somatic, 606764 (3), Hypereosinophilic syndrome, idiopathic, resistant to imatinib, 607685 (3)
DSC3	0.0805931			?Hypotrichosis and recurrent skin vesicles, 613102 (3), Arrhythmogenic right ventricular dysplasia 11 with mild palmoplantar keratoderma and woolly hair, 610476 (3), Arrhythmogenic right ventricular dysplasia 11, 610476 (3)
TLK2	0.0804999	1	0
NKAP	0.0804839
CFDP1	0.0803667
ZNF263	0.0803292
PGP	0.080329
TTC21B	0.0803268			Nephronophthisis 12, 613820 (3), Short-rib thoracic dysplasia 4 with or without polydactyly, 613819 (3)
HNRNPR	0.0802919
IFRD2	0.0802331
SLC12A1	0.0801633			Bartter syndrome, type 1, 601678 (3)
PODNL1	0.0801586
RADIL	0.0801548
KLF5	0.0800274
MED12	0.0799923			Lujan-Fryns syndrome, 309520 (3), Ohdo syndrome, X-linked, 300895 (3), Opitz-Kaveggia syndrome, 305450 (3)
HLA-DQA1	0.0799571			{Celiac disease, susceptibility to}, 212750 (3)
DVL2	0.0799322
CNP	0.0799311
KIAA0319	0.0799282
USP42	0.0799109
TOPORS	0.0797491			Retinitis pigmentosa 31, 609923 (3)
GRID1	0.0797391	2	0
CA3	0.0796882
PLCD4	0.0796841	3	0
TRIM24	0.0796283
FAM160A1	0.0796097
KRTAP13-4	0.0795682
UBE2H	0.079502	3	0
BIRC5	0.0794919
TADA2B	0.0794437
DNASE2B	0.0794234
KLHDC3	0.0794053
BCAM	0.0793705			[Blood group, Auberger system], 111200 (3), [Blood group, Lutheran null], 247420 (3), [Blood group, Lutheran system], 111200 (3)
LRIG2	0.07933			Urofacial syndrome 2, 615112 (3)
XIRP1	0.0793067
SULF2	0.0792601
PSMA8	0.0792345
CNGB1	0.079208			Retinitis pigmentosa 45, 613767 (3)
IQCB1	0.0791831			Senior-Loken syndrome 5, 609254 (3)
ZSCAN32	0.0788692
KLHL17	0.0788651
BAX	0.0788489			Colorectal cancer, somatic, 114500 (3), T-cell acute lymphoblastic leukemia, somatic, 613065 (3)
CDK19	0.0788264
DDR1	0.0788214
HIP1	0.0787062			{Prostate cancer, progression of}, 176807 (1)
PLK5	0.0786982
HSD17B6	0.0786795
OMP	0.0786648
NFKBIE	0.0786578
FRYL	0.0786277
ACADSB	0.0785898			2-methylbutyrylglycinuria, 610006 (3)
AMD1	0.0785345
GBP4	0.0785297
TBCEL	0.0784672
TESK1	0.0783615
RPL19	0.0783337
GTF2H3	0.0783229
ZMYND15	0.0783001			?Spermatogenic failure 14, 615842 (3)
CCDC80	0.0782924
OR5F1	0.0782294
E2F7	0.0782178
NAA60	0.0782037
SMC2	0.0781157			Smith-McCort dysplasia 2, 615222 (3)
KLHDC10	0.0780634
MBD2	0.07804
PERP	0.0780041
ARNT2	0.0779641	3	0	?Webb-Dattani syndrome, 615926 (3)
USP13	0.077953
ZNF114	0.0778804
DEFB110	0.0778291
SNTB2	0.0778071
ATOH1	0.0777949
MATN2	0.077683
PSMD1	0.0776814
MIP	0.0776808			Cataract 15, multiple types, 615274 (3)
FBXL3	0.0776589
BCCIP	0.0776484
MMP9	0.0776263			Metaphyseal anadysplasia 2, 613073 (3)
CCDC59	0.0776258
CAMSAP3	0.0776091
CCT2	0.0776067
ARID2	0.0775639	3	1	Coffin-Siris syndrome 6, 617808 (3)
TOB2	0.0774747
REV1	0.0774503
TAF4	0.0773979
FOXP3	0.0773842			Immunodysregulation, polyendocrinopathy, and enteropathy, X-linked, 304790 (3), {Diabetes mellitus, type I, susceptibility to}, 222100 (3)
FAF2	0.0773758
TMPRSS7	0.0773653
AMACR	0.0773515			Alpha-methylacyl-CoA racemase deficiency, 614307 (3), Bile acid synthesis defect, congenital, 4, 214950 (3)
RASGRP3	0.0773342
RAB6B	0.0772647
IPO13	0.0772576
LCA5	0.0772333			Leber congenital amaurosis 5, 604537 (3)
AARS2	0.0772037			Combined oxidative phosphorylation deficiency 8, 614096 (3), Leukoencephalopathy, progressive, with ovarian failure, 615889 (3)
PMM2	0.0771837			Congenital disorder of glycosylation, type Ia, 212065 (3)
GALNT14	0.0771797	3	0
SMC6	0.0771681
SLC1A4	0.0771655			Spastic tetraplegia, thin corpus callosum, and progressive microcephaly, 616657 (3)
PGRMC1	0.0771185
KBTBD7	0.0770854
CTRB1	0.0770403
SND1	0.0770367	3	0
SORCS1	0.0769975
EIF4A2	0.0769965
ADAM17	0.0769457			?Inflammatory skin and bowel disease, neonatal, 1, 614328 (3)
HLA-DQA2	0.0769425
UBB	0.0768986			Cleft palate, isolated, 119540 (2)
RNF128	0.0768927
MYZAP	0.0768824
EPS8	0.0768524			?Deafness, autosomal recessive 102, 615974 (3)
SPRYD3	0.0768521
IPO8	0.0768428
GCOM1	0.0768098
RPS9	0.0767908
ASL	0.0767549			Argininosuccinic aciduria, 207900 (3)
INSR	0.0767435			Diabetes mellitus, insulin-resistant, with acanthosis nigricans, 610549 (3), Hyperinsulinemic hypoglycemia, familial, 5, 609968 (3), Leprechaunism, 246200 (3), Rabson-Mendenhall syndrome, 262190 (3)
PSENEN	0.0767205			Acne inversa, familial, 2, with or without Dowling-Degos disease, 613736 (3)
RUNDC3B	0.0766272
REPIN1	0.0766144
CCDC102A	0.0765998
ADRM1	0.0764885
CA4	0.076458			Retinitis pigmentosa 17, 600852 (3)
FARP2	0.0764317
PCOLCE	0.0764158
BAIAP2L1	0.0763881
CELF4	0.0763871	1	0
GJA4	0.0763677
RNF151	0.0761342
TMEM163	0.0761322
COPE	0.0760677
SHANK3	0.0759996	1	0	Phelan-McDermid syndrome, 606232 (3), {Schizophrenia 15}, 613950 (3)
MAG	0.0759657			Spastic paraplegia 75, autosomal recessive, 616680 (3)
JAG2	0.0759081
TTC39B	0.0758476
MRPS30	0.0757814
TRIM41	0.0757286
ZNF721	0.0756986
SLC29A3	0.0755749			Histiocytosis-lymphadenopathy plus syndrome, 602782 (3)
ATP6V1H	0.075538
GDF5	0.0755161			?Acromesomelic dysplasia, Hunter-Thompson type, 201250 (3), Brachydactyly, type A1, C, 615072 (3), Brachydactyly, type A2, 112600 (3), Brachydactyly, type C, 113100 (3), Chondrodysplasia, Grebe type, 200700 (3), Du Pan syndrome, 228900 (3), Multiple synostoses syndrome 2, 610017 (3), Symphalangism, proximal, 1B, 615298 (3), {Osteoarthritis-5}, 612400 (3)
DOT1L	0.0755071
ITGB5	0.0754927
RP2	0.0754239			Retinitis pigmentosa 2, 312600 (3)
YPEL5	0.0753859
SH3D21	0.0753576
VPS50	0.075234
MTMR8	0.0751518
ADAMTS9	0.0751398
EXOC6B	0.0750831	3	0
NHLRC1	0.0750377			Epilepsy, progressive myoclonic 2B (Lafora), 254780 (3)
DLGAP2	0.0750299	3	0
PPP6C	0.0749292
ABCA13	0.0748733	3	0
WWC3	0.0748559
CHRNG	0.0748214			Escobar syndrome, 265000 (3), Multiple pterygium syndrome, lethal type, 253290 (3)
GSK3A	0.0748163
ADRA1D	0.0747833
NUP205	0.0747416			?Nephrotic syndrome, type 13, 616893 (3)
PLCL2	0.0747393
SLAIN2	0.0747305
GMPS	0.0747219
NOP53	0.0746428
MYBBP1A	0.0746226
STK17B	0.0746223
MTMR3	0.074605
RNF20	0.0745725
DCAF4L1	0.0745604
DYNAP	0.0745503
SCARA5	0.0745389
UNC119	0.0745254			?Cone-rod dystrophy (3), ?Immunodeficiency 13, 615518 (3)
SACS	0.0744858			Spastic ataxia, Charlevoix-Saguenay type, 270550 (3)
PRDM5	0.0744846			Brittle cornea syndrome 2, 614170 (3)
AMBRA1	0.0744621
TSNAXIP1	0.0744138
PREP	0.0743856
PHF21B	0.0743424
C2CD6	0.0743291
NCOA5	0.0743288
GABRG1	0.0743149
ZBTB7B	0.0742558
SMAD3	0.0741388			Loeys-Dietz syndrome 3, 613795 (3)
HEPHL1	0.0741022
ESPL1	0.074096
TANC2	0.0740796	1	0
RGN	0.074049
NKX2-4	0.0740273
SLC66A2	0.0740184
DUSP14	0.0739945
AMOT	0.0739846
CEP89	0.0739669
NRF1	0.0739359
SPI1	0.0738999
ARHGAP15	0.0738619
TG	0.0738606			Thyroid dyshormonogenesis 3, 274700 (3), {Autoimmune thyroid disease, susceptibility to, 3}, 608175 (3)
ZNF546	0.0738328
SOX13	0.0737411
EPB41L2	0.0737191
SPATA5L1	0.0737143
EXD3	0.0737027
DUS1L	0.0736969
GYG2	0.073687
JUND	0.0736671
LIF	0.0736217
MARF1	0.0735843
CSNK2B	0.0735618
AKR1D1	0.0735294			Bile acid synthesis defect, congenital, 2, 235555 (3)
DGAT1	0.0735164			?Diarrhea 7, 615863 (3)
MSS51	0.0735123
DHCR24	0.0735082			Desmosterolosis, 602398 (3)
SH3RF3	0.0734897	3	0
MCL1	0.0734851
ANGPTL7	0.0734462
NPAP1	0.0733903
GAS6	0.0733349
WAC	0.0733185	1	0	Desanto-Shinawi syndrome, 616708 (3)
RDH5	0.0733061			Fundus albipunctatus, 136880 (3)
BMP5	0.0733045
OPN1MW2	0.0732945
EED	0.0732559			Cohen-Gibson syndrome, 617561 (3)
LMF1	0.0732284			Lipase deficiency, combined, 246650 (3)
DLG5	0.0732245
NECAB2	0.0732116
BMP10	0.073202
CEACAM6	0.0731787
ZNF710	0.0731618
VEZF1	0.0731085	1	0
GPAA1	0.0731026			Glycosylphosphatidylinositol biosynthesis defect 15, 617810 (3)
PCDHB2	0.0730805
ZNF467	0.0730724
PLCB4	0.0730534			Auriculocondylar syndrome 2, 614669 (3)
NEK5	0.0730339
INTS1	0.0730335		1
CCDC146	0.0729981
PNLDC1	0.0729833
PGS1	0.0729262
MAPK6	0.0728796
NFKBIZ	0.0728697
ZNF256	0.0727833
SFMBT2	0.0727812
DNAJC11	0.072777
ZNRF4	0.0727714
BRICD5	0.0727654
AGPAT3	0.07273
SMARCC2	0.0727297	1	0
PLXNB3	0.0726989
POU4F3	0.0726928			Deafness, autosomal dominant 15, 602459 (3)
OR11L1	0.0726685
CASKIN2	0.0726518
TARBP1	0.0726304
CEP170	0.0726291
ELAVL4	0.072569			Neuropathy, paraneoplastic sensory (1)
GPR55	0.0725665
UGGT1	0.0725431
MIPOL1	0.0725424
ITFG1	0.0725351
SAP30	0.0724986
OTOA	0.0724902			Deafness, autosomal recessive 22, 607039 (3)
KIAA1328	0.0724853
PSEN1	0.0724816			?Acne inversa, familial, 3, 613737 (3), Alzheimer disease, type 3, 607822 (3), Alzheimer disease, type 3, with spastic paraparesis and apraxia, 607822 (3), Alzheimer disease, type 3, with spastic paraparesis and unusual plaques, 607822 (3), Cardiomyopathy, dilated, 1U, 613694 (3), Dementia, frontotemporal, 600274 (3), Pick disease, 172700 (3)
SLC35C2	0.0724601
RAB19	0.0724424
SPIN1	0.0724182
CP	0.0724055			Cerebellar ataxia, 604290 (3), Hemosiderosis, systemic, due to aceruloplasminemia, 604290 (3), [Hypoceruloplasminemia, hereditary], 604290 (3)
PPP1R9B	0.0723628	1	0
ATXN3	0.0723607			Machado-Joseph disease, 109150 (3)
PPARGC1B	0.0723596			{Obesity, variation in}, 601665 (3)
TLR8	0.072324
ARIH1	0.0722781
ST3GAL3	0.0722268			?Epileptic encephalopathy, early infantile, 15, 615006 (3), Mental retardation, autosomal recessive 12, 611090 (3)
CHSY1	0.0722161			Temtamy preaxial brachydactyly syndrome, 605282 (3)
SH3PXD2A	0.0721792
SFXN2	0.0721308
CETP	0.07212			Hyperalphalipoproteinemia, 143470 (3), [High density lipoprotein cholesterol level QTL 10], 143470 (3)
SLK	0.0721037
KIAA1217	0.0720771
PSMD4	0.0720354
ACTA1	0.0720352			?Myopathy, scapulohumeroperoneal, 616852 (3), Myopathy, actin, congenital, with cores, 161800 (3), Myopathy, actin, congenital, with excess of thin myofilaments, 161800 (3), Myopathy, congenital, with fiber-type disproportion 1, 255310 (3), Nemaline myopathy 3, autosomal dominant or recessive, 161800 (3)
SVIL	0.0719822
AHI1	0.0719712		1	Joubert syndrome 3, 608629 (3)
DDX53	0.0719565	3	0
TEKT5	0.0719337
L3MBTL4	0.0719252
TMF1	0.0719068
CENPI	0.0718998
PCDHGC5	0.0718976
PDE4A	0.071867
CFI	0.0718661			Complement factor I deficiency, 610984 (3), {Hemolytic uremic syndrome, atypical, susceptibility to, 3}, 612923 (3), {Macular degeneration, age-related, 13, susceptibility to}, 615439 (3)
CYP4F3	0.0718611
MFSD14B	0.0718502
TRIML1	0.0718499
AZI2	0.0718405
RPL7A	0.0718173
EIF3B	0.0717722
TSG101	0.0717711			Breast cancer, somatic, 114480 (3)
FGF12	0.0717709			Epileptic encephalopathy, early infantile, 47, 617166 (3)
PTPRG	0.0717687
PHF19	0.071765
MXRA5	0.0717626
CHIA	0.0717599
CALR3	0.0717577			?Cardiomyopathy, hypertrophic, 19, 613875 (3)
RNF215	0.0717409
DOK7	0.0717063			?Fetal akinesia deformation sequence, 208150 (3), Myasthenic syndrome, congenital, 10, 254300 (3)
GPR75	0.0716417
SEL1L2	0.0716211
HOXA1	0.0715975		1	Athabaskan brainstem dysgenesis syndrome, 601536 (3), Bosley-Salih-Alorainy syndrome, 601536 (3)
CENPE	0.0715869			?Microcephaly 13, primary, autosomal recessive, 616051 (3)
AADACL2	0.0715753
PICK1	0.0715663
ZNF419	0.0715593
TRIM33	0.0715517	3	0
CPXM1	0.0715257
RELB	0.0714683			?Immunodeficiency 53, 617585 (3)
RBBP4	0.0714504
SRSF9	0.0714083
RNF25	0.0713363	3	0
MIB1	0.0713326	3	0	Left ventricular noncompaction 7, 615092 (3)
ADAMTS18	0.0713012			Microcornea, myopic chorioretinal atrophy, and telecanthus, 615458 (3)
CLRN2	0.0712928
ADAM32	0.0712759
SPRR1A	0.0712646
TIGD5	0.0712482
DHX32	0.0712164
OR51I1	0.0711738
L3MBTL1	0.0710922
MAPKBP1	0.0710511			Nephronophthisis 20, 617271 (3)
ZFP64	0.0710504
NKX3-2	0.0709818			Spondylo-megaepiphyseal-metaphyseal dysplasia, 613330 (3)
IFI16	0.0709625
EDC4	0.0709403
CERS6	0.0709386
OCSTAMP	0.0708415
OTP	0.0708209
PSMG2	0.0708135
DDX19B	0.0708125
BTN2A2	0.0707978
CIC	0.0707893	1	0	Mental retardation, autosomal dominant 45, 617600 (3)
ARHGAP20	0.0707767
PRKAR1A	0.0707692			Acrodysostosis 1, with or without hormone resistance, 101800 (3), Adrenocortical tumor, somatic, (3), Carney complex, type 1, 160980 (3), Myxoma, intracardiac, 255960 (3), Pigmented nodular adrenocortical disease, primary, 1, 610489 (3)
LYPD2	0.0707357
AJUBA	0.0707179
CHAMP1	0.070625	1	0	Mental retardation, autosomal dominant 40, 616579 (3)
MPG	0.0706155
BICRAL	0.0705912
CACHD1	0.0705409
BSND	0.070532			Bartter syndrome, type 4a, 602522 (3), Sensorineural deafness with mild renal dysfunction, 602522 (3)
NAXD	0.0705257
WSCD2	0.0705179
TSHR	0.070497			Hyperthyroidism, familial gestational, 603373 (3), Hyperthyroidism, nonautoimmune, 609152 (3), Hypothyroidism, congenital, nongoitrous, 1 275200 (3), Thyroid adenoma, hyperfunctioning, somatic (3), Thyroid carcinoma with thyrotoxicosis (3)
AATK	0.0704694
MAP2K5	0.0704513
C1RL	0.07044
OR1M1	0.0704184
CATSPERG	0.0703752
ASTE1	0.0703667
CREB3L1	0.0703501
RESF1	0.0702918
AHR	0.0702882
OR4X2	0.0702778
MAML1	0.0702327
GYPE	0.0701985
SH3BP4	0.0701946
CTNNAL1	0.0701837
TFRC	0.0701615			Immunodeficiency 46, 616740 (3)
DHX58	0.0701316
EEF1D	0.0701299
NRIP2	0.0701287
H2AX	0.0701097
CPSF7	0.0701029
COPS8	0.070093
KCTD15	0.0700672
MYLK	0.0700347	3	0	Aortic aneurysm, familial thoracic 7, 613780 (3)
HSD17B2	0.0700297
MAP2K3	0.0700016
CCDC130	0.0699584
H4C2	0.0699548
TEX33	0.0699534
ERCC6L	0.0699298
FZR1	0.0699246
CCNT1	0.0697482
ZFAND2B	0.069725
HCN3	0.0697173
ADGRA2	0.0697128
EXD2	0.0697065
ZNF277	0.0697038
OVOL1	0.0695973
BRPF1	0.0695948			Intellectual developmental disorder with dysmorphic facies and ptosis, 617333 (3)
FTSJ3	0.0695831
GRID2	0.0695782	3	0	Spinocerebellar ataxia, autosomal recessive 18, 616204 (3)
EPHA1	0.0695721
MTAP	0.069563			Diaphyseal medullary stenosis with malignant fibrous histiocytoma, 112250 (3)
KRT77	0.0695582
CCDC73	0.0695511
AGER	0.0695491
IMP3	0.0695471
ADD1	0.0694937			{Hypertension, essential, salt-sensitive}, 145500 (3)
PPP4R3B	0.0694912
CUL4B	0.0694853			Mental retardation, X-linked, syndromic 15 (Cabezas type), 300354 (3)
DTX2	0.0694845
FGFR1	0.0694322	2	0	Encephalocraniocutaneous lipomatosis, 613001 (3), Hartsfield syndrome, 615465 (3), Hypogonadotropic hypogonadism 2 with or without anosmia, 147950 (3), Jackson-Weiss syndrome, 123150 (3), Osteoglophonic dysplasia, 166250 (3), Pfeiffer syndrome, 101600 (3), Trigonocephaly 1, 190440 (3)
SUMF1	0.0694011			Multiple sulfatase deficiency, 272200 (3)
HTR1D	0.0693933
CAPG	0.0693559
TUBA1A	0.0693177			Lissencephaly 3, 611603 (3)
NEIL2	0.0693135
H2AC16	0.0692804
NFKBIB	0.0692665
PIBF1	0.0692586			Joubert syndrome 33, 617767 (3)
ST6GALNAC4	0.0692127
SSTR3	0.0691808
ORC1	0.0691133			Meier-Gorlin syndrome 1, 224690 (3)
SHKBP1	0.0691026
CCDC84	0.0690935
KDM1A	0.0690482			Cleft palate, psychomotor retardation, and distinctive facial features, 616728 (3)
CACNB2	0.06898	2	0	Brugada syndrome 4, 611876 (3)
SLC6A12	0.0689742
RBM33	0.0689624
MCM7	0.0689459
CYP4F22	0.0689451			Ichthyosis, congenital, autosomal recessive 5, 604777 (3)
FAM98A	0.0689185
PCK2	0.0689169			PEPCK deficiency, mitochondrial, 261650 (1)
MED24	0.0688409
CSH2	0.0688399
MYH1	0.0688338
ENOSF1	0.0687946
GCGR	0.0687122			{Diabetes mellitus, noninsulin-dependent}, 125853 (3)
TBCB	0.0686889
RAD54L	0.0686449			Adenocarcinoma, colonic, somatic (3), Lymphoma, non-Hodgkin, somatic, 605027 (3), {Breast cancer, invasive ductal}, 114480 (3)
RASGRF1	0.0686335
BRD9	0.0686331
TFAM	0.0686233			?Mitochondrial DNA depletion syndrome 15 (hepatocerebral type), 617156 (3)
PARP14	0.0685744
ABLIM2	0.0685501
FIGLA	0.0685321			Premature ovarian failure 6, 612310 (3)
TNIK	0.068523			Mental retardation, autosomal recessive 54, 617028 (3)
GPR75-ASB3	0.0685081
HEATR1	0.0684869
SFPQ	0.0684861
TGFBR1	0.0684746			Loeys-Dietz syndrome 1, 609192 (3), {Multiple self-healing squamous epithelioma, susceptibility to}, 132800 (3)
PRNP	0.068455			Cerebral amyloid angiopathy, PRNP-related, 137440 (3), Creutzfeldt-Jakob disease, 123400 (3), Gerstmann-Straussler disease, 137440 (3), Huntington disease-like 1, 603218 (3), Insomnia, fatal familial, 600072 (3), Prion disease with protracted course, 606688 (3), {Kuru, susceptibility to}, 245300 (3)
KRTAP1-3	0.0684369
SP3	0.0683701
PRR18	0.0683308
IKZF2	0.0682834
GMDS	0.0682682
GREB1L	0.0682432			Renal hypodysplasia/aplasia 3, 617805 (3)
BNIP3L	0.0682164
ENTR1	0.0681913
ZNF335	0.0681442			?Microcephaly 10, primary, autosomal recessive, 615095 (3)
NEURL2	0.0681437
PLEKHA1	0.0681235
MINDY2	0.0681188
MED12L	0.0681182	3	1
GRIA2	0.0681101	1	0
TNFRSF18	0.0680962
DUSP15	0.0680831	3	0
SLC2A6	0.0680622
RRP1B	0.0680549
USP3	0.0680487
ASB3	0.0680161
MUCL3	0.0680067
NUP85	0.0680037
LINS1	0.0679953			Mental retardation, autosomal recessive 27, 614340 (3)
AFP	0.0679885			Alpha-fetoprotein deficiency, 615969 (3), [Hereditary persistence of alpha-fetoprotein], 615970 (3)
DEF8	0.0679495
CLNK	0.0679325
USF3	0.0678926
WDR48	0.0678896
PDCD6	0.0678825
GPR21	0.067824
SRCAP	0.067803	1	0	Floating-Harbor syndrome, 136140 (3)
CFAP100	0.0677874
APOBR	0.0677824
DISP1	0.067751
PLB1	0.0677488
GTPBP2	0.0677043			Jaberi-Elahi syndrome, 617988 (3)
C1QTNF4	0.0676944
VN1R1	0.0676829
GNRHR	0.0676786			Hypogonadotropic hypogonadism 7 without anosmia, 146110 (3)
BTBD17	0.067657
FBXO16	0.0676443
USP51	0.0676373
PHF2	0.0676219	1	0
QTRT2	0.0676214
TSTA3	0.0675127
ATP1B1	0.0674786			[Blood pressure regulation QTL], 145500 (2)
OR6C76	0.0674389
L1TD1	0.0674084
KIF18A	0.0674032
CAPRIN1	0.0673694	1	0
NBPF3	0.0673512
INTS14	0.0673272
BRD1	0.0672652
SLC34A2	0.0672342			Pulmonary alveolar microlithiasis, 265100 (3)
H3C13	0.0672306
LY6G6F	0.0672216
MMRN2	0.0671062
ADNP2	0.0671037
SPDEF	0.067061
INTS7	0.067042
TMEM189-UBE2V1	0.0669811
ASB1	0.0669429
GPR61	0.066925
PAQR6	0.066913
STAT1	0.0669062			Immunodeficiency 31A, mycobacteriosis, autosomal dominant, 614892 (3), Immunodeficiency 31B, mycobacterial and viral infections, autosomal recessive, 613796 (3), Immunodeficiency 31C, autosomal dominant, 614162 (3)
KIF11	0.0669007			Microcephaly with or without chorioretinopathy, lymphedema, or mental retardation, 152950 (3)
ANKEF1	0.0668352
GOLPH3	0.0668192
PKD2L1	0.06677
NPC1	0.0667186			Niemann-Pick disease, type C1, 257220 (3), Niemann-Pick disease, type D, 257220 (3), {Nasopharyngeal carcinoma 1} (2)
RPS15	0.0667028
UBE2V1	0.0667026
PER1	0.0666596	3	0
BRINP1	0.0666516
CCT6B	0.0665362
TNFSF10	0.0665216
STARD8	0.0665075
UBP1	0.0664543
TOR1AIP1	0.066448			?Muscular dystrophy, limb-girdle, type 2Y, 617072 (3)
ZNF665	0.0663629
BBS12	0.0663255			Bardet-Biedl syndrome 12, 615989 (3)
REG4	0.0663236
LMO2	0.0663159			Leukemia, acute T-cell (2)
KRTAP1-1	0.0662674
FSHB	0.0662636			Hypogonadotropic hypogonadism 24 without anosmia, 229070 (3)
CYP27C1	0.0662617
KLF11	0.0662477			Maturity-onset diabetes of the young, type VII, 610508 (3)
TELO2	0.0662255			You-Hoover-Fong syndrome, 616954 (3)
CTDSP2	0.0661593
LHFPL3	0.0661234
FLRT1	0.0661219
PHLDB1	0.0661009
CPNE4	0.0660933
PGM2	0.0660765
SAMD4A	0.0660566
DNAJB11	0.066053
TBC1D25	0.0660496
MMD2	0.066045			Miyoshi muscular dystrophy 2 (2)
ZBTB8B	0.0660445
DSCAML1	0.0659974
SH2D3A	0.0659802
PABPC1L	0.0659771
FNTB	0.0659376
CALHM3	0.0659127
TMEM190	0.0658475
PRAMEF2	0.0657582
CNTNAP1	0.065746			Lethal congenital contracture syndrome 7, 616286 (3)
CHMP4B	0.0657404			Cataract 31, multiple types, 605387 (3)
ARHGEF16	0.0657205
NASP	0.0656981
AQP10	0.0656975
BPIFB4	0.0656854
GNB1	0.0656816			Leukemia, acute lymphoblastic, somatic, 613065 (3), Mental retardation, autosomal dominant 42, 616973 (3)
FAM72B	0.0656788
ZNF596	0.0656783
PPFIA3	0.0656566
CAVIN4	0.0656438
ZP4	0.065618
BZW2	0.0656176
ACSM5	0.0656172
LIMA1	0.0655957
MYSM1	0.065592
UACA	0.0655891
MAD1L1	0.0655601			Lymphoma, somatic (3), Prostate cancer, somatic, 176807 (3)
EME1	0.0654955
H2BC11	0.065487	3	0
PLCB3	0.0654697
PNLIP	0.0654288			?Pancreatic lipase deficiency, 614338 (3)
RPL30	0.0653945
CTDP1	0.0653777			Congenital cataracts, facial dysmorphism, and neuropathy, 604168 (3)
DMRT3	0.0653626
FANCD2OS	0.0653446
CYB5A	0.0652961			Methemoglobinemia and ambiguous genitalia, 250790 (3)
ANKRD30B	0.0652711
FAM186B	0.0652692
ACKR1	0.0652372			[Blood group, Duffy system], 110700 (3), [White blood cell count QTL], 611862 (3), {Malaria, vivax, protection against}, 611162 (3)
CTAGE9	0.0652347
CTNS	0.0652212			Cystinosis, atypical nephropathic, 219800 (3), Cystinosis, late-onset juvenile or adolescent nephropathic, 219900 (3), Cystinosis, nephropathic, 219800 (3), Cystinosis, ocular nonnephropathic, 219750 (3)
DBR1	0.0651842
ADAP1	0.0651685
AMOTL1	0.0651198
CHCHD10	0.0650901			?Myopathy, isolated mitochondrial, autosomal dominant, 616209 (3), Frontotemporal dementia and/or amyotrophic lateral sclerosis 2, 615911 (3), Spinal muscular atrophy, Jokela type, 615048 (3)
UBE3A	0.0650897	1	0	Angelman syndrome, 105830 (3)
WDR37	0.0650844
MED7	0.0650815
TIGD7	0.065017
METTL8	0.0649591
MTMR6	0.0649291
COPS2	0.0649108
UBN2	0.0648665	2	0
KIF1A	0.0648309			Mental retardation, autosomal dominant 9, 614255 (3), Neuropathy, hereditary sensory, type IIC, 614213 (3), Spastic paraplegia 30, autosomal recessive, 610357 (3)
NOL10	0.0648019
GRK3	0.0647705
MVK	0.0647111			Hyper-IgD syndrome, 260920 (3), Mevalonic aciduria, 610377 (3), Porokeratosis 3, multiple types, 175900 (3)
NUDT16	0.0646893
CHURC1-FNTB	0.0646819
STRADB	0.0646781
PEX5L	0.0646712
ATG4A	0.0646333
SLC16A2	0.0646074			Allan-Herndon-Dudley syndrome, 300523 (3)
SPSB4	0.064577
CBX7	0.0645593
KRT80	0.0645317
CBWD5	0.06451
UGT2A2	0.0645063
DACT1	0.064505			?Townes-Brocks syndrome 2, 617466 (3)
ATP23	0.0644997
L3MBTL2	0.0644876
ZNF845	0.0644794
DDX60L	0.0644561
RFTN1	0.0644411
USP19	0.064388
SALL1	0.0643699			Townes-Brocks branchiootorenal-like syndrome, 107480 (3), Townes-Brocks syndrome 1, 107480 (3)
CCN1	0.0643591
GRAMD1A	0.064354
FNDC3B	0.0643404
ZNF766	0.0643386
LRBA	0.0643353	3	0	Immunodeficiency, common variable, 8, with autoimmunity, 614700 (3)
GOLGA8A	0.0643201
OGDH	0.0643124			Alpha-ketoglutarate dehydrogenase deficiency, 203740 (1)
DOC2B	0.0643097
TPSB2	0.0643044
ITSN1	0.0642858	3	0
ETS2	0.0642592
RAB2A	0.0642513	2	0
TMEM232	0.0642503
SP7	0.0642275			?Osteogenesis imperfecta, type XII, 613849 (3)
AP1S2	0.0642128		1	Mental retardation, X-linked syndromic 5, 304340 (3)
BMPER	0.0642125			Diaphanospondylodysostosis, 608022 (3)
RNF220	0.0641287
TRAK2	0.0641248
FNDC3A	0.0641164
USF2	0.0641143
LPCAT2	0.0641086
PSMD8	0.0641082
RASAL1	0.0640625
RTP2	0.064047
MTMR14	0.0640362			{Centronuclear myopathy, autosomal, modifier of}, 160150 (3)
MGRN1	0.0640209
TGM1	0.063976			Ichthyosis, congenital, autosomal recessive 1, 242300 (3)
DENND2D	0.0639728
PSD4	0.0639587
SCN2B	0.0639563			Atrial fibrillation, familial, 14, 615378 (3)
CTAGE6	0.063903
RHOT2	0.0638981
ITFG2	0.0638963
DDX17	0.0638756
COL26A1	0.0638735
TNS1	0.0638647
ITGAD	0.0638553
PTPRK	0.0638466
AKNAD1	0.0638419
TSPAN14	0.0638261
TBL2	0.0638179
NRXN2	0.0638159	1	0
PRPF6	0.0638089			Retinitis pigmentosa 60, 613983 (3)
CHST12	0.0637982
LY75-CD302	0.0637944
BLK	0.0637916			Maturity-onset diabetes of the young, type 11, 613375 (3)
CREB5	0.0637756
NCR1	0.0637634
NBPF15	0.0637594
CDC42	0.0637492			Takenouchi-Kosaki syndrome, 616737 (3)
CRPPA	0.0637394
SCAF8	0.0637309
CPA1	0.063704
VPS4A	0.0636893
GSPT2	0.0636683
GJA10	0.0636608
GABRQ	0.0636372
TMEM45A	0.0636185
ENPP7	0.0636063
UGT2A1	0.0635928
PDE6C	0.0635656			Cone dystrophy 4, 613093 (3)
EIF3G	0.0635275	1	0
RIN2	0.0635218			Macrocephaly, alopecia, cutis laxa, and scoliosis, 613075 (3)
MAEA	0.063485
EHD2	0.0634546
GSAP	0.0634401
MAP6	0.0634384
TBC1D8B	0.0634301
CSF2RB	0.0633851			Surfactant metabolism dysfunction, pulmonary, 5, 614370 (3)
FXYD7	0.0633567
ZEB2	0.0633318			Mowat-Wilson syndrome, 235730 (3)
PLEKHM2	0.0632914
OTOF	0.0632904			Auditory neuropathy, autosomal recessive, 1, 601071 (3), Deafness, autosomal recessive 9, 601071 (3)
DOCK4	0.0632809	3	0
FSBP	0.0632799
ATP1A1	0.0632435	3	1	Charcot-Marie-Tooth disease, axonal, type 2DD, 618036 (3)
VRK2	0.0632344
LY75	0.0632202
TRUB1	0.0631576
RORB	0.0631102	1	0
RCCD1	0.063102
KRT15	0.0631007
SLC2A14	0.0630856
KLHL40	0.063073			Nemaline myopathy 8, autosomal recessive, 615348 (3)
RP1	0.0630726			Retinitis pigmentosa 1, 180100 (3), Symmetric circumferential skin creases, congenital, 2, 616734 (3)
FCGR3B	0.0630652			Neutropenia, alloimmune neonatal (3)
RD3L	0.0630119
KIAA1257	0.0629898
ABCC4	0.0629784
SFRP2	0.0629753
MVB12B	0.0629674
STOX2	0.0629641
KRT16	0.0629563			Pachyonychia congenita 1, 167200 (3), Palmoplantar keratoderma, nonepidermolytic, focal, 613000 (3)
THBS1	0.0629513	3	0
GPS1	0.0628669
FGF5	0.0628654			Trichomegaly, 190330 (3)
RTN4	0.0628609
FBXO8	0.0628499
CFAP74	0.0628352
EIF5A2	0.0627716
ATP5MF-PTCD1	0.0627611
STAP2	0.062757
HUNK	0.0627422
ZNF550	0.0627393
MRPL38	0.0627262
SYN3	0.0627256
[truncated: 16,989 more rows]

## Sheet: LGD_Trivial
gene	probability	score	syndromic	OMIM
ARID1B	0.989757	1	0	Coffin-Siris syndrome 1, 135900 (3)
KMT2A	0.982162	1	0	Leukemia, myeloid/lymphoid or mixed-lineage (2), Wiedemann-Steiner syndrome, 605130 (3)
SYNGAP1	0.980892	1	0	Mental retardation, autosomal dominant 5, 612621 (3)
ADNP	0.978534	1	0	Helsmoortel-van der Aa syndrome, 615873 (3)
CHD8	0.975851	1	0	{Autism, susceptibility to, 18}, 615032 (3)
DDX3X	0.97387	1	0	Mental retardation, X-linked 102, 300958 (3)
DYRK1A	0.972602	1	0	Mental retardation, autosomal dominant 7, 614104 (3)
ANKRD11	0.96975	1	0	KBG syndrome, 148050 (3)
MECP2	0.960883	1	0	Encephalopathy, neonatal severe, 300673 (3), Mental retardation, X-linked syndromic, Lubs type, 300260 (3), Mental retardation, X-linked, syndromic 13, 300055 (3), Rett syndrome, 312750 (3), Rett syndrome, atypical, 312750 (3), Rett syndrome, preserved speech variant, 312750 (3), {Autism susceptibility, X-linked 3}, 300496 (3)
SETD5	0.95292	1	0	Mental retardation, autosomal dominant 23, 615761 (3)
POGZ	0.947191	1	0	White-Sutton syndrome, 616364 (3)
MED13L	0.946964	1	0	Mental retardation and distinctive facial features with or without cardiac defects, 616789 (3), Transposition of the great arteries, dextro-looped 1, 608808 (3)
TCF4	0.940758	1	0	Corneal dystrophy, Fuchs endothelial, 3, 613267 (3), Pitt-Hopkins syndrome, 610954 (3), {Diabetes mellitus, type 2, susceptibility to}, 125853 (3)
SHANK3	0.937966	1	0	Phelan-McDermid syndrome, 606232 (3), {Schizophrenia 15}, 613950 (3)
ASH1L	0.936667	1	0	Mental retardation, autosomal dominant 52, 617796 (3)
KANSL1	0.935533	1	0	Koolen-De Vries syndrome, 610443 (3)
SCN2A	0.934167	1	0	Epileptic encephalopathy, early infantile, 11, 613721 (3), Seizures, benign familial infantile, 3, 607745 (3)
FOXP1	0.932162	1	0	Mental retardation with language impairment and with or without autistic features, 613670 (3)
CTNNB1	0.909965	1	0	Colorectal cancer, somatic, 114500 (3), Exudative vitreoretinopathy 7, 617572 (3), Hepatocellular carcinoma, somatic, 114550 (3), Medulloblastoma, somatic, 155255 (3), Mental retardation, autosomal dominant 19, 615075 (3), Ovarian cancer, somatic, 167000 (3), Pilomatricoma, somatic, 132600 (3)
WDFY3	0.907034	1	0	?Microcephaly 18, primary, autosomal dominant, 617520 (3)
ASXL3	0.905662	1	0	Bainbridge-Ropers syndrome, 615485 (3)
KMT2C	0.889165	1	0	Kleefstra syndrome 2, 617768 (3)
WDR45	0.88306			Neurodegeneration with brain iron accumulation 5, 300894 (3)
CHAMP1	0.877359	1	0	Mental retardation, autosomal dominant 40, 616579 (3)
WAC	0.875499	1	0	Desanto-Shinawi syndrome, 616708 (3)
PTEN	0.845736	1	0	Bannayan-Riley-Ruvalcaba syndrome, 153480 (3), Cowden syndrome 1, 158350 (3), Endometrial carcinoma, somatic, 608089 (3), Lhermitte-Duclos syndrome, 158350 (3), Macrocephaly/autism syndrome, 605309 (3), Malignant melanoma, somatic, 155600 (3), PTEN hamartoma tumor syndrome (3), Squamous cell carcinoma, head and neck, somatic, 275355 (3), VATER association with macrocephaly and ventriculomegaly, 2…
SATB2	0.842116	3	1	Glass syndrome, 612313 (3)
KDM6A	0.834583	2	0	Kabuki syndrome 2, 300867 (3)
KAT6A	0.828164	2	1	Mental retardation, autosomal dominant 32, 616268 (3)
ANK2	0.826683	1	0	Cardiac arrhythmia, ankyrin-B-related, 600919 (3), Long QT syndrome 4, 600919 (3)
HNRNPU	0.825814	1	0	Epileptic encephalopathy, early infantile, 54, 617391 (3)
CHD2	0.823133	1	0	Epileptic encephalopathy, childhood-onset, 615369 (3)
AHDC1	0.819963	1	0	Xia-Gibbs syndrome, 615829 (3)
SRCAP	0.794877	1	0	Floating-Harbor syndrome, 136140 (3)
KDM6B	0.78181	1	0
SPAST	0.778566	1	0	Spastic paraplegia 4, autosomal dominant, 182601 (3)
GATAD2B	0.769068			Mental retardation, autosomal dominant 18, 615074 (3)
SET	0.765197	2	0
PHF3	0.76414	1	0
SMC1A	0.763962		1	Cornelia de Lange syndrome 2, 300590 (3)
BRPF1	0.762616			Intellectual developmental disorder with dysmorphic facies and ptosis, 617333 (3)
QRICH1	0.757667	2	0	Ververi-Brady syndrome, 617982 (3)
CLTC	0.7547			Mental retardation, autosomal dominant 56, 617854 (3)
AUTS2	0.754457	1	0
CHD7	0.754018	1	0	CHARGE syndrome, 214800 (3), Hypogonadotropic hypogonadism 5 with or without anosmia, 612370 (3)
NSD1	0.752002	1	0	Leukemia, acute myeloid, 601626 (1), Sotos syndrome 1, 117550 (3)
MED13	0.751267	1	0
TBL1XR1	0.751253	1	0	Mental retardation, autosomal dominant 41 , 616944 (3), Pierpont syndrome, 602342 (3)
SPEN	0.750738	2	0	Megakaryoblastic leukemia, acute (2)
NEXMIF	0.746276	2	0	Mental retardation, X-linked 98, 300912 (3)
TCF20	0.74617	1	0
GIGYF1	0.743963	1	0
ZC4H2	0.743039			Wieacker-Wolff syndrome, 314580 (3)
HIVEP3	0.742661	2	0
KAT6B	0.740527	3	0	Genitopatellar syndrome, 606170 (3), SBBYSS syndrome, 603736 (3)
HECTD4	0.737096	1	0
EP300	0.731651	1	0	Colorectal cancer, somatic, 114500 (3), Rubinstein-Taybi syndrome 2, 613684 (3)
TRIP12	0.727753	1	0	Mental retardation, autosomal dominant 49, 617752 (3)
SLC6A1	0.726307	1	0	Myoclonic-atonic epilepsy, 616421 (3)
SETBP1	0.709749	1	0	Mental retardation, autosomal dominant 29, 616078 (3), Schinzel-Giedion midface retraction syndrome, 269150 (3)
MYT1L	0.68514	1	0	Mental retardation, autosomal dominant 39, 616521 (3)
ZFHX3	0.68169			{Prostate cancer, susceptibility to, somatic}, 176807 (3)
PHIP	0.675955	1	0	Developmental delay, intellectual disability, obesity, and dysmorphic features, 617991 (3)
CUL3	0.673694	1	0	Pseudohypoaldosteronism, type IIE, 614496 (3)
DSCAM	0.648623	1	0
SMARCC2	0.648593	1	0
PLXNA3	0.648185	3	0
NUDT17	0.642333
STARD9	0.638813
CHD5	0.635271
DVL3	0.632372	3	0	Robinow syndrome, autosomal dominant 3, 616894 (3)
SKIDA1	0.631732
DIP2C	0.631609	2	0
UNC5B	0.625831
LRP2	0.623405	3	0	Donnai-Barrow syndrome, 222448 (3)
ARHGEF9	0.623058	1	0	Epileptic encephalopathy, early infantile, 8, 300607 (3)
DOT1L	0.622528
KMT5B	0.62216	1	0	Mental retardation, autosomal dominant 51, 617788 (3)
LEO1	0.61869	2	0
GRIN2B	0.618276	1	0	Epileptic encephalopathy, early infantile, 27, 616139 (3), Mental retardation, autosomal dominant 6, 613970 (3)
TNRC6B	0.61799	2	0
TCF7L2	0.617782	1	0	{Diabetes mellitus, type 2, susceptibility to}, 125853 (3)
NF1	0.616768	1	0	Leukemia, juvenile myelomonocytic, 607785 (3), Neurofibromatosis, familial spinal, 162210 (3), Neurofibromatosis, type 1, 162200 (3), Neurofibromatosis-Noonan syndrome, 601321 (3), Watson syndrome, 193520 (3)
IQSEC2	0.616638	1	0	Mental retardation, X-linked 1/78, 309530 (3)
ASXL1	0.615134			Bohring-Opitz syndrome, 605039 (3), Myelodysplastic syndrome, somatic, 614286 (3)
CASK	0.614577	1	0	FG syndrome 4, 300422 (3), Mental retardation and microcephaly with pontine and cerebellar hypoplasia, 300749 (3), Mental retardation, with or without nystagmus, 300422 (3)
SOX5	0.614179	1	0	Lamb-Shaffer syndrome, 616803 (3)
PHF2	0.613836	1	0
KMT2E	0.613773	1	0
LARP4B	0.613093
UPF3B	0.611269	1	0	Mental retardation, X-linked, syndromic 14, 300676 (3)
STXBP1	0.610632	1	0	Epileptic encephalopathy, early infantile, 4, 612164 (3)
MEIS2	0.609543	1	0	Cleft palate, cardiac defects, and mental retardation, 600987 (3)
ZBTB18	0.608571			Mental retardation, autosomal dominant 22, 612337 (3)
TNC	0.608387			Deafness, autosomal dominant 56, 615629 (3)
CNOT3	0.607204	1	0
CREBBP	0.606178	1	0	Rubinstein-Taybi syndrome 1, 180849 (3)
TRIP11	0.605982			Achondrogenesis, type IA, 200600 (3)
KATNAL2	0.605271	1	0
KMT2D	0.604878			Kabuki syndrome 1, 147920 (3)
KIF11	0.604746			Microcephaly with or without chorioretinopathy, lymphedema, or mental retardation, 152950 (3)
MBD5	0.604414	1	0	Mental retardation, autosomal dominant 1, 156200 (3)
LAMB1	0.604149	2	0	Lissencephaly 5, 615191 (3)
RANBP17	0.603888	2	0
LMTK3	0.603256
HSPG2	0.601921			Dyssegmental dysplasia, Silverman-Handmaker type, 224410 (3), Schwartz-Jampel syndrome, type 1, 255800 (3)
DIP2A	0.601515	1	0
FAM200A	0.601021
IRF2BPL	0.59899	1	0
SHANK2	0.597685	1	0	{Autism susceptibility 17}, 613436 (3)
ANP32A	0.597196
RIMS1	0.597106	1	0	Cone-rod dystrophy 7, 603649 (3)
NSD2	0.593503	2	1
NAA15	0.592885	1	0	Mental retardation, autosomal dominant 50, 617787 (3)
PURA	0.592632			Mental retardation, autosomal dominant 31, 616158 (3)
TAB2	0.592403			Congenital heart defects, nonsyndromic, 2, 614980 (3)
UBR3	0.592209
FOXG1	0.591401	1	0	Rett syndrome, congenital variant, 613454 (3)
KCNQ2	0.590304	2	0	Epileptic encephalopathy, early infantile, 7, 613720 (3), Myokymia, 121200 (3), Seizures, benign neonatal, 1, 121200 (3)
CAMK2A	0.590172	3	1	Mental retardation, autosomal dominant 53, 617798 (3)
BCL11A	0.589894	1	0	Dias-Logan syndrome, 617101 (3)
OFD1	0.589553	3	0	?Retinitis pigmentosa 23, 300424 (3), Joubert syndrome 10, 300804 (3), Orofaciodigital syndrome I, 311200 (3), Simpson-Golabi-Behmel syndrome, type 2, 300209 (3)
NFIB	0.586646	3	1
HDAC8	0.585724		1	Cornelia de Lange syndrome 5, 300882 (3)
NR3C2	0.585157	1	0	Hypertension, early-onset, autosomal dominant, with exacerbation in pregnancy, 605115 (3), Pseudohypoaldosteronism type I, autosomal dominant, 177735 (3)
PPM1D	0.582834	3	1	Breast cancer, somatic, 114480 (3), Intellectual developmental disorder with gastrointestinal difficulties and high pain threshold, 617450 (3)
DST	0.582671	3	0	?Neuropathy, hereditary sensory and autonomic, type VI, 614653 (3), Epidermolysis bullosa simplex, autosomal recessive 2, 615425 (3)
TBR1	0.58176	1	0
NFIX	0.579064		1	Marshall-Smith syndrome, 602535 (3), Sotos syndrome 2, 614753 (3)
HECTD1	0.573721
PAXX	0.571522
UBN2	0.570507	2	0
SIN3A	0.570255	1	0	Witteveen-Kolk syndrome, 613406 (3)
TAOK2	0.568273	2	0
PDE11A	0.563168			Pigmented nodular adrenocortical disease, primary, 2, 610475 (3)
PER2	0.553247	2	0	Advanced sleep phase syndrome, familial, 1, 604348 (3)
BAZ2B	0.533528	1	0
DOP1A	0.532529
GPRIN1	0.518525
PUM2	0.491269
USP9X	0.476919	1	1	Mental retardation, X-linked 99, 300919 (3), Mental retardation, X-linked 99, syndromic, female-restricted, 300968 (3)
RARG	0.429777
SLC2A1	0.425119			Dystonia 9, 601042 (3), GLUT1 deficiency syndrome 1, infantile onset, severe, 606777 (3), GLUT1 deficiency syndrome 2, childhood onset, 612126 (3), Stomatin-deficient cryohydrocytosis with neurologic defects, 608885 (3), {Epilepsy, idiopathic generalized, susceptibility to, 12}, 614847 (3)
OSBPL8	0.424158
SLA	0.423072			Pontocerebellar hypoplasia type 2D, 613811 (3)
PRKAR1B	0.422917	3	0
SUCLG2	0.422525
CKAP5	0.421826
MYH13	0.41871
SLIT2	0.418052
SLC25A39	0.417992	3	0
C3AR1	0.41644
LPGAT1	0.416326
PRPF39	0.41599	3	0
LRFN2	0.414356	3	0
TLK2	0.411841	1	0
SMARCA5	0.409978
THSD7A	0.40857
PHTF2	0.408363
SPATA13	0.408086
MPLKIP	0.407305			Trichothiodystrophy 4, nonphotosensitive, 234050 (3)
OOSP2	0.407302
SECTM1	0.407067
UBAP2	0.40611
OR51A2	0.405982
IFI44L	0.405595
ITGB5	0.405076
BCAS3	0.404863
PDX1	0.403944			Lacticacidemia due to PDX1 deficiency, 245349 (3), MODY, type IV, 606392 (3), Pancreatic agenesis 1, 260370 (3), {Diabetes mellitus, type II, susceptibility to}, 125853 (3)
DMWD	0.403434	3	0
SIRPB1	0.403384
PCSK2	0.403284
RTEL1	0.402681			Dyskeratosis congenita, autosomal dominant 4, 615190 (3), Dyskeratosis congenita, autosomal recessive 5, 615190 (3), Pulmonary fibrosis and/or bone marrow failure, telomere-related, 3, 616373 (3)
DYNC1LI2	0.402097
SPAG9	0.402005
FOXO6	0.401964
DHX16	0.401862
GRAMD2A	0.400939
NFE2L3	0.400569	2	0
ZMIZ1	0.400561	2	1
AKAP7	0.400514
HOXD1	0.400368
ATP13A3	0.400308
IFI30	0.400202
NBEA	0.400005	1	0
SLC25A30	0.399677
PTPN13	0.399637
TM4SF19-TCTEX1D2	0.399299
TMEM30A	0.398514
RPAP1	0.398366
TM4SF19	0.398349	3	0
TMEM131	0.398338
DNAH17	0.398263	3	0
SORBS1	0.398165
PCK2	0.398105			PEPCK deficiency, mitochondrial, 261650 (1)
PRKAR1A	0.397563			Acrodysostosis 1, with or without hormone resistance, 101800 (3), Adrenocortical tumor, somatic, (3), Carney complex, type 1, 160980 (3), Myxoma, intracardiac, 255960 (3), Pigmented nodular adrenocortical disease, primary, 1, 610489 (3)
C18orf54	0.397272
MYO1E	0.396635	3	0	Glomerulosclerosis, focal segmental, 6, 614131 (3)
NBPF8	0.396408
MSL3	0.396329	2	1
FADS3	0.396228
SELENON	0.396031			Muscular dystrophy, rigid spine, 1, 602771 (3), Myopathy, congenital, with fiber-type disproportion, 255310 (3)
XKR6	0.395899
ZBTB45	0.395786
POLI	0.395557
TNRC18	0.39519
POLM	0.395168
DNPEP	0.394688
RASSF7	0.394439
DNAH5	0.3943			Ciliary dyskinesia, primary, 3, with or without situs inversus, 608644 (3)
DGCR8	0.393978
ATP1A1	0.393922	3	1	Charcot-Marie-Tooth disease, axonal, type 2DD, 618036 (3)
PISD	0.393729
KDM3A	0.393439
FBXW11	0.393311
VIP	0.393233
ZNF226	0.393232
RANBP2	0.3932			{Encephalopathy, acute, infection-induced, 3, susceptibility to}, 608033 (3)
TOP2B	0.393059
CD36	0.393009			Platelet glycoprotein IV deficiency, 608404 (3), [Macrothrombocytopenia] (1), {Coronary heart disease, susceptibility to, 7}, 610938 (3), {Malaria, cerebral, reduced risk of}, 611162 (3), {Malaria, cerebral, susceptibility to}, 611162 (3)
PRSS38	0.392936
PFKL	0.392879			Hemolytic anemia due to phosphofructokinase deficiency (1)
OR10Z1	0.392647
JARID2	0.392613	2	0
MIPEP	0.392521			Combined oxidative phosphorylation deficiency 31, 617228 (3)
MTUS1	0.392469
ECE1	0.392316			?Hirschsprung disease, cardiac defects, and autonomic dysfunction, 613870 (3), {Hypertension, essential, susceptibility to}, 145500 (3)
ZNF775	0.392209
DNM1	0.392197			Epileptic encephalopathy, early infantile, 31, 616346 (3)
KDM3B	0.392165	1	0
FAM8A1	0.392086
AMOTL1	0.392033
AZGP1	0.391964	3	0
PQBP1	0.391935			Renpenning syndrome, 309500 (3)
BTBD9	0.391788
MYL6B	0.391689
PCM1	0.391672	3	0
ZNF391	0.391606
PTK7	0.391472	1	0
CROT	0.391432
ADAMTS2	0.391423			Ehlers-Danlos syndrome, dermatosparaxis type, 225410 (3)
TTC37	0.391161			Trichohepatoenteric syndrome 1, 222470 (3)
STAG2	0.391157
NOXO1	0.391134
USP15	0.391045	2	0
DHX29	0.390694
SLC6A3	0.39068	2	0	Parkinsonism-dystonia, infantile, 613135 (3), {Nicotine dependence, protection against}, 188890 (3)
BRSK1	0.390643
GIMAP8	0.39064
FAM71F1	0.390577
SF1	0.390493			46, XX sex reversal 4, 617480 (3), 46XY sex reversal 3, 612965 (3), Adrenocortical insufficiency, 612964 (3), Premature ovarian failure 7, 612964 (3), Spermatogenic failure 8, 613957 (3)
G3BP2	0.390451
ECM2	0.390279
SNRNP70	0.390274
ASXL2	0.390096			Shashi-Pena syndrome, 617190 (3)
ILVBL	0.39003
C11orf24	0.390021
GGT1	0.389571			?Glutathioninuria, 231950 (3)
ITFG2	0.389543
ZNF567	0.389451
CEP120	0.389355			Joubert syndrome 31, 617761 (3), Short-rib thoracic dysplasia 13 with or without polydactyly, 616300 (3)
KHSRP	0.389316
FBXW5	0.389163
TSPAN17	0.388988	3	0
PLA1A	0.388934
MMP21	0.38887			Heterotaxy, visceral, 7, autosomal, 616749 (3)
GLYAT	0.388865
SLC7A7	0.388849	3	0	Lysinuric protein intolerance, 222700 (3)
ITGA5	0.388714
EDEM3	0.388613
MSH4	0.388588
CELF4	0.388577	1	0
ZC3H18	0.38848
DPP3	0.38847	3	0
GOLGA5	0.388463
PSMD12	0.38841	1	0	Stankiewicz-Isidor syndrome, 617516 (3)
APH1A	0.388357	2	0
CYLC1	0.388245
POM121	0.388125
POLRMT	0.388125
CHD3	0.387956	1	0
STAB1	0.387841
RASSF8	0.387801
DMAC2	0.38778
PAFAH1B2	0.387587	3	0
DNAJC17	0.387467
BCLAF1	0.387429
SLC12A7	0.387109
COL5A3	0.38704
CDKL5	0.387	1	0	Epileptic encephalopathy, early infantile, 2, 300672 (3)
KLHL7	0.38695			Cold-induced sweating syndrome 3, 617055 (3), Retinitis pigmentosa 42, 612943 (3)
FAM91A1	0.386941
SPDYC	0.386868
WNT9A	0.386682
CBL	0.386637			?Juvenile myelomonocytic leukemia, 607785 (3), Noonan syndrome-like disorder with or without juvenile myelomonocytic leukemia, 613563 (3)
OXR1	0.386637
TOGARAM1	0.386621
SDR42E1	0.386558
CRTC2	0.386471
EBF1	0.386421
SCN7A	0.386378
DSG3	0.386347
ZFP36L2	0.38597
PRPF8	0.385873			Retinitis pigmentosa 13, 600059 (3)
MSH2	0.385811			Colorectal cancer, hereditary nonpolyposis, type 1, 120435 (3), Mismatch repair cancer syndrome, 276300 (3), Muir-Torre syndrome, 158320 (3)
PHF8	0.385626		1	Mental retardation syndrome, X-linked, Siderius type, 300263 (3)
CTCF	0.385559	1	0	Mental retardation, autosomal dominant 21, 615502 (3)
ANO9	0.385487
IFT88	0.385444
SREBF2	0.385295
ROBO2	0.385292	2	0	Vesicoureteral reflux 2, 610878 (3)
FCRL6	0.385229	3	0
TRPM3	0.385184
FAM200B	0.385138
B4GALNT1	0.384996			Spastic paraplegia 26, autosomal recessive, 609195 (3)
ZNF462	0.384901	1	0
SLC6A8	0.384721	3	0	Cerebral creatine deficiency syndrome 1, 300352 (3)
STAU1	0.384714
CELF2	0.38457
PORCN	0.384557			Focal dermal hypoplasia, 305600 (3)
TMPRSS12	0.384517
SCN1A	0.384393	1	0	Epilepsy, generalized, with febrile seizures plus, type 2, 604403 (3), Epileptic encephalopathy, early infantile, 6 (Dravet syndrome), 607208 (3), Febrile seizures, familial, 3A, 604403 (3), Migraine, familial hemiplegic, 3, 609634 (3)
RIPOR1	0.384344
TRIM17	0.384272
SBDS	0.384219			Shwachman-Diamond syndrome, 260400 (3), {Aplastic anemia, susceptibility to}, 609135 (3)
LTN1	0.384085
CDAN1	0.384048			Dyserythropoietic anemia, congenital, type Ia, 224120 (3)
DUS1L	0.384002
DOCK5	0.383909
HMGN2	0.383808
YME1L1	0.383792			?Optic atrophy 11, 617302 (3)
SLC44A4	0.383384			?Deafness, autosomal dominant 72, 617606 (3)
AVPR1A	0.383225	2	0
FAM168B	0.383151
TUSC1	0.38314
LRRFIP2	0.383044
ENTR1	0.382974
PTMS	0.382799
INTS6	0.382796	2	0
DNAJC11	0.382795
FAM98A	0.382699
PGBD4	0.382673
USP45	0.382633	2	0
UNC80	0.3826	3	0	Hypotonia, infantile, with psychomotor retardation and characteristic facies 2, 616801 (3)
RPL12	0.382592
PLXNB1	0.382408	2	0
STARD10	0.382405
EFCAB8	0.382361
KYNU	0.382261			?Hydroxykynureninuria, 236800 (3), Vertebral, cardiac, renal, and limb defects syndrome 2, 617661 (3)
PALB2	0.382177			Fanconi anemia, complementation group N, 610832 (3), {Breast cancer, susceptibility to}, 114480 (3), {Pancreatic cancer, susceptibility to, 3}, 613348 (3)
HSPA13	0.38196
MED12	0.381926			Lujan-Fryns syndrome, 309520 (3), Ohdo syndrome, X-linked, 300895 (3), Opitz-Kaveggia syndrome, 305450 (3)
NFKBIL1	0.381885			{Rheumatoid arthritis, susceptibility to}, 180300 (3)
TMEM39B	0.381828	3	0
GOPC	0.381683
ATF4	0.381567
MTIF2	0.381554
UBAP2L	0.381522
ACOX2	0.381354			Bile acid synthesis defect, congenital, 6, 617308 (3)
URI1	0.381225
SPP2	0.381142	3	0
FLG	0.381112			Ichthyosis vulgaris, 146700 (3), {Dermatitis, atopic, susceptibility to, 2}, 605803 (3)
SLC12A6	0.381101			Agenesis of the corpus callosum with peripheral neuropathy, 218000 (3)
KREMEN1	0.381095			Ectodermal dysplasia 13, hair/tooth type, 617392 (3)
PAX2	0.381086			Glomerulosclerosis, focal segmental, 7, 616002 (3), Papillorenal syndrome, 120330 (3)
KIAA0100	0.380951
CSTF2T	0.380831
URB1	0.380703
ZNF598	0.380649
ZC3H4	0.380597	2	0
NEXN	0.38059			Cardiomyopathy, dilated, 1CC, 613122 (3), Cardiomyopathy, hypertrophic, 20, 613876 (3)
CACNA2D3	0.380572	1	0
ERF	0.38051			Chitayat syndrome, 617180 (3), Craniosynostosis 4, 600775 (3)
ADCY9	0.3805
DNAJA1	0.380473
RAD21L1	0.380251	3	0
MOV10	0.380248
SKI	0.380159	1	0	Shprintzen-Goldberg syndrome, 182212 (3)
NR2F6	0.380129
ARHGAP30	0.380034
KLHDC10	0.380033
ANOS1	0.380007
MEA1	0.379966
HSPA9	0.37993			Anemia, sideroblastic, 4, 182170 (3), Even-plus syndrome, 616854 (3)
STAM	0.37991
JADE2	0.37974
SH3D19	0.379577
TSPEAR	0.379315			?Deafness, autosomal recessive 98, 614861 (3)
POLR1E	0.37925
PFKFB2	0.379161
CMYA5	0.379134
TYW5	0.379099
SLC4A5	0.379016
MYO9B	0.378858	2	0	{Celiac disease, susceptibility to, 4}, 609753 (3)
TBCEL	0.37856
OR52M1	0.37845	2	0
ILF2	0.378418	2	0
IL27	0.378301
PCDH11X	0.378263	3	0
RAB2A	0.378172	2	0
AP1G2	0.378161
OLFM3	0.378123
MEF2C	0.37779	1	0	Chromosome 5q14.3 deletion syndrome, 613443 (4), Mental retardation, stereotypic movements, epilepsy, and/or cerebral malformations, 613443 (3)
IFNA10	0.377746
CTH	0.377744			Cystathioninuria, 219500 (3), Homocysteine, total plasma, elevated (3)
CMPK2	0.377692	3	0
SEMA4F	0.377631
CNKSR2	0.377448	2	1	Mental retardation, X-linked, syndromic, Houge type, 301008 (3)
SRPK2	0.377055
PCOLCE	0.376891
FARP1	0.376885
ANKFN1	0.376868
SPRED2	0.37684
KIAA0232	0.37683	1	0
PATJ	0.376814	3	0
CCNH	0.376811
VAV3	0.376787
ABCC10	0.376731
PLEKHB2	0.376426
AKAP9	0.376385	2	0	?Long QT syndrome-11, 611820 (3)
SRSF11	0.376352	2	0
AMZ2	0.376323
RUNDC3B	0.37631
ZFAND5	0.376191
NINL	0.376129	2	0
BRCA2	0.376119	3	0	Fanconi anemia, complementation group D1, 605724 (3), Wilms tumor, 194070 (3), {Breast cancer, male, susceptibility to}, 114480 (3), {Breast-ovarian cancer, familial, 2}, 612555 (3), {Glioblastoma 3}, 613029 (3), {Medulloblastoma}, 155255 (3), {Pancreatic cancer 2}, 613347 (3), {Prostate cancer}, 176807 (3)
NMT1	0.375968
BCOR	0.375917			Microphthalmia, syndromic 2, 300166 (3)
CC2D1A	0.375915	2	0	Mental retardation, autosomal recessive 3, 608443 (3)
FAM177A1	0.375874
PPP1R7	0.375731
CCPG1	0.375693
LSM3	0.375666
AASDH	0.375552
COL18A1	0.375544			Knobloch syndrome, type 1, 267750 (3)
CAPN8	0.375454
ZFPL1	0.375452
CAPRIN1	0.375338	1	0
SMAP2	0.375337			Dentin dysplasia, type I, with microdontia and misshapen teeth, 125400 (3)
TTC9C	0.375302
FBN1	0.375272	2	0	Acromicric dysplasia, 102370 (3), Ectopia lentis, familial, 129600 (3), Geleophysic dysplasia 2, 614185 (3), MASS syndrome, 604308 (3), Marfan lipodystrophy syndrome, 616914 (3), Marfan syndrome, 154700 (3), Stiff skin syndrome, 184900 (3), Weill-Marchesani syndrome 2, dominant, 608328 (3)
CD101	0.375238
HHAT	0.375227
RELN	0.375205	1	0	Lissencephaly 2 (Norman-Roberts type), 257320 (3), {Epilepsy, familial temporal lobe, 7}, 616436 (3)
PCDH19	0.37518	1	0	Epileptic encephalopathy, early infantile, 9, 300088 (3)
CDC23	0.375132
NAXE	0.375104			Encephalopathy, progressive, early-onset, with brain edema and/or leukoencephalopathy, 617186 (3)
ADAMTS9	0.375101
NOTCH1	0.375069			Adams-Oliver syndrome 5, 616028 (3), Aortic valve disease 1, 109730 (3)
ADAMTS10	0.375027			Weill-Marchesani syndrome 1, recessive, 277600 (3)
NOP2	0.374981
NME8	0.37495			Ciliary dyskinesia, primary, 6, 610852 (3)
KIF21A	0.374913			Fibrosis of extraocular muscles, congenital, 1, 135700 (3), Fibrosis of extraocular muscles, congenital, 3B, 135700 (3)
GFOD2	0.374881
TMEM105	0.374827
PRR14L	0.374739
PDCD1	0.374728	3	0	{Multiple sclerosis, disease progression, modifier of}, 126200 (3), {Systemic lupus erythematosus, susceptibility to, 2}, 605218 (3)
FXYD5	0.374721
PLA2G15	0.374682
ANO5	0.374658			Gnathodiaphyseal dysplasia, 166260 (3), Miyoshi muscular dystrophy 3, 613319 (3), Muscular dystrophy, limb-girdle, type 2L, 611307 (3)
CNOT4	0.374642
MAP1B	0.374413
ACACB	0.374334
CFAP45	0.374263
MSL2	0.374139
NOS3	0.37406			{Alzheimer disease, late-onset, susceptibility to}, 104300 (3), {Coronary artery spasm 1, susceptibility to} (3), {Hypertension, pregnancy-induced}, 189800 (3), {Hypertension, susceptibility to}, 145500 (3), {Ischemic stroke, susceptibility to}, 601367 (3), {Placental abruption} (3)
NAPG	0.374002
SNAP25	0.373962	3	0	?Myasthenic syndrome, congenital, 18, 616330 (3)
G3BP1	0.373919
PAX5	0.373858	1	0	{Leukemia, acute lymphoblastic, susceptibility to, 3}, 615545 (3)
BRF1	0.373595			Cerebellofaciodental syndrome, 616202 (3)
ENTPD6	0.373554
CCNT2	0.373539
BRINP2	0.3735
CTSZ	0.373366
CDK13	0.37336		1	Congenital heart defects, dysmorphic facial features, and intellectual developmental disorder, 617360 (3)
RIC1	0.373218
TMEM45A	0.373144
ARVCF	0.373103
RBMS1	0.373067
ZC3H14	0.37306			Mental retardation, autosomal recessive 56, 617125 (3)
TMPRSS7	0.37305
MYH2	0.373032			Proximal myopathy and ophthalmoplegia, 605637 (3)
ERLIN1	0.373031			Spastic paraplegia 62, 615681 (3)
PHF1	0.373026
NONO	0.372903			Mental retardation, X-linked, syndromic 34, 300967 (3)
REXO1	0.372825
OSER1	0.372812
IL23R	0.37275			{Inflammatory bowel disease 17, protection against}, 612261 (3), {Psoriasis, protection against}, 605606 (3)
HGF	0.372633			?Fibromatosis, gingival, 1, 135300 (3), Deafness, autosomal recessive 39, 608265 (3), Noonan syndrome 4, 610733 (3), {Crohn disease-associated growth failure}, 266600 (3), {Diabetes, susceptibility to}, 222100, 125853 (3), {Intracranial hemorrhage in brain cerebrovascular malformations, susceptibility to}, 108010 (3), {Kaposi sarcoma, susceptibility to}, 148000 (3), {Rheumatoid arthritis, systemi…
NDST4	0.372477
STXBP5L	0.372451
SMARCD1	0.372424
SVIL	0.372261
CREBZF	0.372201
CORO2B	0.372137
SIX2	0.372023
XPO4	0.371997
RFX7	0.371954
SPINK5	0.371691			Netherton syndrome, 256500 (3)
CTBP2	0.371631
PSMA3	0.371629
MEMO1	0.371602	3	0
LYPD4	0.371329
RAPGEF4	0.371275	3	0
LRRFIP1	0.371211
NCOR1	0.371186	2	0
RNF213	0.37115			{Moyamoya disease 2, susceptibility to}, 607151 (3)
TCF3	0.371068			Agammaglobulinemia 8, autosomal dominant, 616941 (3)
MRE11	0.371034			Ataxia-telangiectasia-like disorder 1, 604391 (3)
NPAT	0.371024
CHD4	0.370795			Sifrim-Hitz-Weiss syndrome, 617159 (3)
CSPP1	0.370791			Joubert syndrome 21, 615636 (3)
FOSL2	0.370657
CBX4	0.370568
MAK	0.370546			Retinitis pigmentosa 62, 614181 (3)
ASAH2	0.370521
TBXT	0.370495
KCNE2	0.370481			Atrial fibrillation, familial, 4, 611493 (3), Long QT syndrome 6, 613693 (3)
GAREM1	0.37025
SLC22A7	0.370154
GRIA2	0.370115	1	0
KLC1	0.370112
SPATA2	0.370038
NFX1	0.370011
TMEM132B	0.369949
FKBP15	0.369674
PSMD3	0.369587
SIRPB2	0.369576
RNF111	0.369519
ASB17	0.369457
SORCS3	0.369455	2	0
PALLD	0.369443			{Pancreatic cancer, susceptibility to, 1}, 606856 (3)
KAT2B	0.369423	2	0
ADAM33	0.369268
BTAF1	0.369126	2	0
WDR26	0.368998		1	Skraban-Deardorff syndrome, 617616 (3)
PPFIA2	0.368939
ADTRP	0.36887
HOXC10	0.368781
DMD	0.368736		1	Becker muscular dystrophy, 300376 (3), Cardiomyopathy, dilated, 3B, 302045 (3), Duchenne muscular dystrophy, 310200 (3)
DDX31	0.368664
RNF38	0.368644	3	0
FLT4	0.368621			Hemangioma, capillary infantile, somatic, 602089 (3), Lymphedema, hereditary, IA, 153100 (3)
CEP295	0.368565
BSDC1	0.368538
RIMBP2	0.368501
ZFYVE26	0.368448	3	0	Spastic paraplegia 15, autosomal recessive, 270700 (3)
STXBP3	0.368433
PSD3	0.368313	3	0
MUC21	0.368266
POTEH	0.368157
CYB561D1	0.3681
MISP	0.36805
IGSF3	0.368004			?Lacrimal duct defect, 149700 (3)
YTHDC1	0.367924
GIMAP1	0.367874
LRP4	0.367796			?Myasthenic syndrome, congenital, 17, 616304 (3), Cenani-Lenz syndactyly syndrome, 212780 (3), Sclerosteosis 2, 614305 (3)
TOR1AIP2	0.367767
PITPNA	0.367752
CACNA1E	0.367564	1	0
COL3A1	0.367496			Ehlers-Danlos syndrome, vascular type, 130050 (3)
CYP27C1	0.367484
CDH10	0.36744	3	0
RO60	0.367426
CFAP410	0.367332
HEATR5B	0.3673
SUFU	0.36728			Basal cell nevus syndrome, 109400 (3), Joubert syndrome 32, 617757 (3), Medulloblastoma, desmoplastic, 155255 (3), {Meningioma, familial, susceptibility to}, 607174 (3)
BCORL1	0.367228		1
FOXP2	0.367217	1	0	Speech-language disorder-1, 602081 (3)
CIC	0.36718	1	0	Mental retardation, autosomal dominant 45, 617600 (3)
RP1L1	0.367141			Occult macular dystrophy, 613587 (3)
CDC42BPB	0.36714	2	0
CEP112	0.3671
NXPE4	0.36704
CRCT1	0.367005
NPIPB5	0.366988
MEGF6	0.366926
DBF4B	0.366888
ANKHD1-EIF4EBP3	0.366788
ARID2	0.366574	3	1	Coffin-Siris syndrome 6, 617808 (3)
GIMAP1-GIMAP5	0.366556
CFAP74	0.366496
PAK1IP1	0.36643
NPBWR1	0.3664
CCDC82	0.366186
RALGAPA2	0.36611
ZBTB20	0.366085	1	0	Primrose syndrome, 259050 (3)
PRMT2	0.365929
HNRNPD	0.365886
ANKHD1	0.365793
ANKRD60	0.365677
PHF12	0.365653	1	0
TCF24	0.365646
GPR39	0.365527
MIA2	0.365429
ARID5B	0.3653
VARS1	0.365151			Neurodevelopmental disorder with microcephaly, seizures, and cortical atrophy, 617802 (3)
FOCAD	0.365047
EHMT1	0.364883	1	0	Kleefstra syndrome 1, 610253 (3)
IQSEC1	0.364811
PGM5	0.364756
XRN1	0.364724
CHD1	0.364702	3	1	Pilarowski-Bjornsson syndrome, 617682 (3)
MAN1B1	0.364648			Mental retardation, autosomal recessive 15, 614202 (3)
USP54	0.364576
SCUBE2	0.364556
INTS1	0.36452		1
ZNF490	0.364394
SAP130	0.364272
ERCC4	0.36426			?XFE progeroid syndrome, 610965 (3), Fanconi anemia, complementation group Q, 615272 (3), Xeroderma pigmentosum, group F, 278760 (3), Xeroderma pigmentosum, type F/Cockayne syndrome, 278760 (3)
GLRB	0.364246			Hyperekplexia 2, 614619 (3)
SETD2	0.364184	1	0	Luscan-Lumish syndrome, 616831 (3)
HMCN2	0.364135
ZNF614	0.363939
SLC25A6	0.363914
RPH3A	0.363898
AHCYL2	0.363892
EMSY	0.363548	2	0
ZBTB1	0.36331
TGM1	0.363273			Ichthyosis, congenital, autosomal recessive 1, 242300 (3)
COL25A1	0.363231			Fibrosis of extraocular muscles, congenital, 5, 616219 (3)
PSD2	0.36322
LRBA	0.363142	3	0	Immunodeficiency, common variable, 8, with autoimmunity, 614700 (3)
PPP1R12A	0.363128
CCDC87	0.363115
ANKMY1	0.363053
GALM	0.36301
ZRANB3	0.362922
TSPOAP1	0.362912	3	0
USP53	0.362766
NFATC4	0.362553
NPFFR2	0.362513
P2RX5	0.362419	2	0
CFAP44	0.362417			?Spermatogenic failure 20, 617593 (3)
DNAJC10	0.362381
MORC3	0.362343
WDR87	0.362177
MAD1L1	0.362168			Lymphoma, somatic (3), Prostate cancer, somatic, 176807 (3)
TFE3	0.362129			Renal cell carcinoma, papillary, 1, 300854 (3)
WDR41	0.362052
P2RX5-TAX1BP3	0.362036
GLIPR1L2	0.361864
SLC35A3	0.361832			?Arthrogryposis, mental retardation, and seizures, 615553 (3)
CYP17A1	0.361777			17,20-lyase deficiency, isolated, 202110 (3), 17-alpha-hydroxylase/17,20-lyase deficiency, 202110 (3)
DNMT3A	0.361738	1	0	Acute myeloid leukemia, somatic, 601626 (3), Tatton-Brown-Rahman syndrome, 615879 (3)
ZMYND11	0.361713	2	0	Mental retardation, autosomal dominant 30, 616083 (3)
AADAC	0.361683
NLGN4X	0.361629	1	0
ZNF790	0.361629
CALU	0.361617
DTWD2	0.36146
GRIK1	0.361459
THAP5	0.36131
TANC2	0.361299	1	0
NEDD9	0.361291
IL3	0.361238
LIMA1	0.361205
EPHB2	0.361158	3	0	{Prostate cancer/brain cancer susceptibility, somatic}, 603688 (3)
ANKRD12	0.361039
PLEKHO1	0.360931
POLR3A	0.360908	3	1	Leukodystrophy, hypomyelinating, 7, with or without oligodontia and/or hypogonadotropic hypogonadism, 607694 (3)
HCRTR1	0.360839
DMXL2	0.360833	3	0	?Deafness, autosomal dominant 71, 617605 (3), ?Polyendocrine-polyneuropathy syndrome, 616113 (3)
CTNNA3	0.360832	3	0	Arrhythmogenic right ventricular dysplasia, familial, 13, 615616 (3)
ASB14	0.360805	3	0
AMPD1	0.360799	2	0	Myopathy due to myoadenylate deaminase deficiency, 615511 (3)
SRRM2	0.360792
PNPLA7	0.360695	3	0
PAQR6	0.360634
TAS2R14	0.36048
SEMA6A	0.360429
CNTNAP3	0.360258	2	0
FNBP4	0.360256
BCL9	0.360133
ZDBF2	0.3601
CPSF7	0.360079
NLRP12	0.36			Familial cold autoinflammatory syndrome 2, 611762 (3)
GET4	0.359985
OPHN1	0.359953	2	0	Mental retardation, X-linked, with cerebellar hypoplasia and distinctive facial appearance, 300486 (3)
EFTUD2	0.359863			Mandibulofacial dysostosis, Guion-Almeida type, 610536 (3)
GALNT3	0.359855			Tumoral calcinosis, hyperphosphatemic, familial, 1, 211900 (3)
PLEK	0.359785
SCNN1D	0.35966
AFAP1L1	0.359493
USF3	0.359471
GLYR1	0.359426
TNFRSF6B	0.359339
CCDC171	0.359296
FGD4	0.359215			Charcot-Marie-Tooth disease, type 4H, 609311 (3)
STKLD1	0.359199
OR2T10	0.359186	3	0
SPTBN1	0.359056
NHLRC2	0.358972
NOL6	0.358888
ITSN1	0.358879	3	0
METAP1D	0.358877
TRIM66	0.358854
METTL26	0.358843	3	0
RNF167	0.358789
GUCA2A	0.358742
SLC35G1	0.358644
CD163L1	0.358614
GALNT18	0.358542
PLCD4	0.358521	3	0
ARMC2	0.358518
FREM3	0.35849
CACNA1S	0.358479			Hypokalemic periodic paralysis, type 1, 170400 (3), {Malignant hyperthermia susceptibility 5}, 601887 (3), {Thyrotoxic periodic paralysis, susceptibility to, 1}, 188580 (3)
TSPAN4	0.358453	3	0
ST3GAL6	0.358293
UBE3A	0.358127	1	0	Angelman syndrome, 105830 (3)
L1CAM	0.358061			CRASH syndrome, 303350 (3), Corpus callosum, partial agenesis of, 304100 (3), Hydrocephalus due to aqueductal stenosis, 307000 (3), Hydrocephalus with Hirschsprung disease, 307000 (3), Hydrocephalus with congenital idiopathic intestinal pseudoobstruction, 307000 (3), MASA syndrome, 303350 (3)
C12orf4	0.358025
FBXO11	0.358007	3	1
C10orf90	0.357952
RIPPLY1	0.357831
ZNF292	0.357798	1	0
DAAM1	0.35774
ZEB2	0.357675			Mowat-Wilson syndrome, 235730 (3)
ZBTB7A	0.357607
NALCN	0.357563			Congenital contractures of the limbs and face, hypotonia, and developmental delay, 616266 (3), Hypotonia, infantile, with psychomotor retardation and characteristic facies 1, 615419 (3)
RBM19	0.357554
MCM8	0.357358			?Premature ovarian failure 10, 612885 (3)
TOPBP1	0.357098
YTHDF3	0.357089
HEATR1	0.357004
MYORG	0.356957
CRYBG3	0.356922
KALRN	0.356741			{Coronary heart disease, susceptibility to, 5}, 608901 (3)
AFM	0.356727
RPS6KA3	0.35671	3	1	Coffin-Lowry syndrome, 303600 (3), Mental retardation, X-linked 19, 300844 (3)
KIF2C	0.356504
COPB2	0.35644			?Microcephaly 19, primary, autosomal recessive, 617800 (3)
ELAVL2	0.356429	3	0
RASGEF1A	0.356404
FIGN	0.356369
SIK3	0.356219
NBEAL2	0.356162			Gray platelet syndrome, 139090 (3)
STRIP1	0.356032
LRP6	0.355933			Tooth agenesis, selective, 7, 616724 (3), {Coronary artery disease, autosomal dominant, 2}, 610947 (3)
PINK1	0.355876			Parkinson disease 6, early onset, 605909 (3)
PEX11B	0.355828			?Peroxisome biogenesis disorder 14B, 614920 (3)
ARID1A	0.355815			Coffin-Siris syndrome 2, 614607 (3)
RNF146	0.355617
GCM1	0.355553
DMBT1	0.355472
MAP2	0.355467
ETF1	0.355455
P4HA3	0.355455
RUNDC1	0.355339
VWCE	0.355216
HYKK	0.355086
DONSON	0.354975			Microcephaly, short stature, and limb abnormalities, 617604 (3), Microcephaly-micromelia syndrome, 251230 (3)
PRRX2	0.354838
BTN1A1	0.354659
FAM169A	0.35465
DCP1A	0.354442
SCP2	0.354413	3	0	?Leukoencephalopathy with dystonia and motor neuropathy, 613724 (3)
ARHGAP5	0.354347	3	0
SLC13A2	0.354328
PHF7	0.353973	2	0
LAMC3	0.353922			Cortical malformations, occipital, 614115 (3)
SETD1A	0.353918	1	0
CPD	0.353865
CA5B	0.35374
MLANA	0.35373	3	0
AMBP	0.353525
ATP10D	0.353484
RAD51AP2	0.353467
CNOT1	0.353204	2	0
LRRTM2	0.353047
EZR	0.353043
FBH1	0.352323
TEX12	0.352258
PHF21A	0.352239	1	0
EHBP1	0.351943			{Prostate cancer, hereditary, 12}, 611868 (3)
CKB	0.351925
ANKRD20A4	0.351905
ADSS2	0.351588	3	0
CDKN2AIP	0.351357
EBF3	0.351197	1	0	Hypotonia, ataxia, and delayed development syndrome, 617330 (3)
BRSK2	0.351098	1	0
FAN1	0.351091	3	0	Interstitial nephritis, karyomegalic, 614817 (3)
EPB41L4A	0.350997
VAPA	0.350921
OPCML	0.350887			{Ovarian cancer, somatic}, 167000 (3)
GRIN2C	0.350877
CASZ1	0.350782	1	0
SCARA3	0.350714
ITPRIPL1	0.350241
SLC47A2	0.350189
FANCE	0.349957			Fanconi anemia, complementation group E, 600901 (3)
NFATC1	0.349655
EYA1	0.349221			?Otofaciocervical syndrome, 166780 (3), Anterior segment anomalies with or without cataract, 602588 (3), Branchiootic syndrome 1, 602588 (3), Branchiootorenal syndrome 1, with or without cataracts, 113650 (3)
MYOC	0.3492			Glaucoma 1A, primary open angle, 137750 (3)
PCDHGA2	0.349044
USP29	0.34824
NOTCH2	0.348214			Alagille syndrome 2, 610205 (3), Hajdu-Cheney syndrome, 102500 (3)
TRAF7	0.348196	1	0
CHM	0.348166	3	0	Charcot-Marie-Tooth disease, dominant intermediate D, 607791 (3), Charcot-Marie-Tooth disease, type 1B, 118200 (3), Charcot-Marie-Tooth disease, type 2I, 607677 (3), Charcot-Marie-Tooth disease, type 2J, 607736 (3), Choroideremia, 303100 (3), Dejerine-Sottas disease, 145900 (3), Neuropathy, congenital hypomyelinating, 605253 (3), Roussy-Levy syndrome, 180800 (3)
HIBADH	0.348121
FASN	0.347344
TPT1	0.347275
MTMR12	0.347028
SYVN1	0.34644
RAI1	0.346413	1	0	Smith-Magenis syndrome, 182290 (3)
WNT7B	0.346134
HMMR	0.345863			{Breast cancer, susceptibility to}, 114480 (3)
PBX1	0.345801	3	0	Congenital anomalies of kidney and urinary tract syndrome with or without hearing loss, abnormal ears, or developmental delay, 617641 (3)
ZFC3H1	0.345754
DENND5A	0.34573			Epileptic encephalopathy, early infantile, 49, 617281 (3)
VPS4B	0.345612
ZFP2	0.345303
MFSD3	0.345117
DUOX1	0.3451
FSIP2	0.344957
PTCHD1	0.344837	1	0	{Autism, susceptibility to, X-linked 4}, 300830 (3)
MDN1	0.344778
COL1A1	0.344713			Caffey disease, 114000 (3), Ehlers-Danlos syndrome, arthrochalasia type, 1, 130060 (3), Osteogenesis imperfecta, type I, 166200 (3), Osteogenesis imperfecta, type II, 166210 (3), Osteogenesis imperfecta, type III, 259420 (3), Osteogenesis imperfecta, type IV, 166220 (3), {Bone mineral density variation QTL, osteoporosis}, 166710 (3)
NAPRT	0.344559
CCM2L	0.344236
BIRC3	0.344193
UHRF1BP1L	0.344101
BRWD1	0.344008
PCDHA13	0.343772	3	0
TNFRSF8	0.343616
ZNF536	0.343318
ZNF853	0.343176
ADGRB1	0.343126
BNIP1	0.342831
TWF2	0.342783
SLC35A2	0.34272			Congenital disorder of glycosylation, type IIm, 300896 (3)
RAPGEF3	0.342512
KLB	0.342313
TRPM6	0.342081			Hypomagnesemia 1, intestinal, 602014 (3)
COL6A6	0.342033
SPRY2	0.341823			{?IgA nephropathy, susceptibility to, 3}, 616818 (3)
SCAMP2	0.341655
DSCAML1	0.3412
HIVEP2	0.341131	1	0	Mental retardation, autosomal dominant 43, 616977 (3)
ZWILCH	0.341065	3	0
TGFBRAP1	0.34059
SPARCL1	0.340588	2	0
MPHOSPH8	0.340575
C15orf62	0.33956	3	0
PMM2	0.339516			Congenital disorder of glycosylation, type Ia, 212065 (3)
BRF2	0.339457
INO80D	0.33881
TRPM5	0.338362
ZNF687	0.337751			Paget disease of bone 6, 616833 (3)
CFAP43	0.337657			Spermatogenic failure 19, 617592 (3)
MINDY3	0.337501
RCBTB1	0.336659			Retinal dystrophy with or without extraocular anomalies, 617175 (3)
MEAK7	0.336656
ACSS1	0.336407
MAP4K4	0.336401
WDR13	0.335695
NAXD	0.335551
DDX60	0.334291
SLC35A4	0.334128
COL9A2	0.333856			?Stickler syndrome, type V, 614284 (3), Epiphyseal dysplasia, multiple, 2, 600204 (3)
ICE2	0.333128
VPS13D	0.331319
PARD3B	0.331307	2	0
ARMC8	0.331225
CTNND1	0.329743			Blepharocheilodontic syndrome 2, 617681 (3)
GALNT14	0.329721	3	0
NOTCH4	0.329044
AP4E1	0.32866			Spastic paraplegia 51, autosomal recessive, 613744 (3), Stuttering, familial persistent, 1, 184450 (3)
KDR	0.328473			Hemangioma, capillary infantile, somatic, 602089 (3), {Hemangioma, capillary infantile, susceptibility to}, 602089 (3)
SMARCE1	0.328328			Coffin-Siris syndrome 5, 616938 (3), {Meningioma, familial, susceptibility to}, 607174 (3)
CHST10	0.326095
COL23A1	0.32606
NOP53	0.326046
MATK	0.325968
PHF5A	0.324622
GIGYF2	0.324388	1	0	{Parkinson disease 11}, 607688 (3)
BRCA1	0.322473			Fanconi anemia, complementation group S, 617883 (3), {Breast-ovarian cancer, familial, 1}, 604370 (3), {Pancreatic cancer, susceptibility to, 4}, 614320 (3)
NHSL1	0.318281
NBPF14	0.317994
SRGAP2	0.317717
STMN4	0.317621
TICRR	0.316878
COL7A1	0.315191			EBD inversa, 226600 (3), EBD, Bart type, 132000 (3), EBD, localisata variant (3), Epidermolysis bullosa dystrophica, AD, 131750 (3), Epidermolysis bullosa dystrophica, AR, 226600 (3), Epidermolysis bullosa pruriginosa, 604129 (3), Epidermolysis bullosa, pretibial, 131850 (3), Toenail dystrophy, isolated, 607523 (3), Transient bullous of the newborn, 131705 (3)
ZC3H11A	0.315047	3	0
RESP18	0.311847
H4C8	0.310817
ABL1	0.308746			Congenital heart defects and skeletal malformations syndrome, 617602 (3), Leukemia, Philadelphia chromosome-positive, resistant to imatinib (3)
SLC9A3	0.304912			Diarrhea 8, secretory sodium, congenital, 616868 (3)
UNC79	0.302851	2	0
MIR1915HG	0.302244
C2CD6	0.300862
WRAP53	0.299335			Dyskeratosis congenita, autosomal recessive 3, 613988 (3)
NIN	0.297278			?Seckel syndrome 7, 614851 (3)
MYBL2	0.290524
EFCAB5	0.285199
ST20-MTHFS	0.28464
MTHFS	0.283641
VSIG4	0.271933	3	0
LIG3	0.266674
SH2B1	0.266663
NACC1	0.26385	1	0	Neurodevelopmental disorder with epilepsy, cataracts, feeding difficulties, and delayed brain myelination, 617393 (3)
ATRNL1	0.261667
ETFB	0.258169	2	0	Glutaric acidemia IIB, 231680 (3)
RERE	0.257659	1	0	Neurodevelopmental disorder with or without anomalies of the brain, eye, or heart, 616975 (3)
ARL14EP	0.254041
UBR5	0.25384	2	0
BST2	0.253746
CCDC178	0.249304
PDHA1	0.243383			Pyruvate dehydrogenase E1-alpha deficiency, 312170 (3)
EMX1	0.243215
CUBN	0.241243			Megaloblastic anemia-1, Finnish type, 261100 (3)
TMPRSS9	0.233071
IL17RA	0.225348			Immunodeficiency 51, 613953 (3)
DNAJB6	0.222775			Muscular dystrophy, limb-girdle, type 1E, 603511 (3)
EXT1	0.222108	3	0	Chondrosarcoma, 215300 (3), Exostoses, multiple, type 1, 133700 (3)
MGRN1	0.219986
OLFML2B	0.218225
DHX57	0.202179
MPDZ	0.18677			Hydrocephalus, nonsyndromic, autosomal recessive 2, 615219 (3)
IARS2	0.186528			?Cataracts, growth hormone deficiency, sensory neuropathy, sensorineural hearing loss, and skeletal dysplasia, 616007 (3)
TCF12	0.17601			Craniosynostosis 3, 615314 (3)
SLC12A2	0.17064
C1orf198	0.154245
KCNS3	0.141724	2	0
RTL1	0.141422
UGT1A8	0.140279
UGT1A7	0.138899
UGT1A4	0.138666
UGT1A3	0.13856
UGT1A9	0.138281
UGT1A6	0.138
UGT1A10	0.137636
UGT1A1	0.137552			Crigler-Najjar syndrome, type I, 218800 (3), Crigler-Najjar syndrome, type II, 606785 (3), Hyperbilirubinemia, familial transient neonatal, 237900 (3), [Bilirubin, serum level of, QTL1], 601816 (3), [Gilbert syndrome], 143500 (3)
UGT1A5	0.136457
MFRP	0.128191	2	0	Microphthalmia, isolated 5, 611040 (3), Nanophthalmos 2, 609549 (3)
S100G	0.122947
RRAS	0.120644
EFCAB6	0.117488
TBC1D23	0.116104		1	Pontocerebellar hypoplasia, type 11, 617695 (3)
ASCC3	0.115489
MUC5B	0.107751			{Pulmonary fibrosis, idiopathic, susceptibility to}, 178500 (3)
JAKMIP1	0.103924
ANKFY1	0.101758
MYH10	0.0977459	2	0
OR4C11	0.0944339
AIFM3	0.0939489
FAM49A	0.0921503
TOMM20L	0.0920576
JMJD1C	0.091694	3	0
UPF2	0.0854968	3	0
CCDC66	0.0850924
MAPK8IP3	0.0834986
LZTR1	0.0803072	1	0	Noonan syndrome 10, 616564 (3), {Schwannomatosis-2, susceptibility to}, 615670 (3)
RBMX	0.0759418			?Mental retardation, X-linked, syndromic 11, Shashi type, 300238 (3)
IQGAP2	0.0713116
TPTE	0.0703304
KDM5B	0.0677699	1	0
GRWD1	0.0668123
SMPD2	0.056778
RABGAP1L	0.0566661
H1-4	0.0524779
VEZF1	0.0515349	1	0
TARS2	0.0463453			?Combined oxidative phosphorylation deficiency 21, 615918 (3)
RAB8B	0.0446975
STOM	0.0444636
TRAK1	0.0444537
MKI67	0.0443837
PRSS33	0.0443776
NEPRO	0.0443515
LY6D	0.0443357
MIPOL1	0.0443263
CREBRF	0.0443152
KRTAP12-4	0.0443143
NDUFS5	0.0443002
BAALC-AS2	0.0442944
CPNE6	0.0442827
PEX12	0.0442827			Peroxisome biogenesis disorder 3A (Zellweger), 614859 (3), Peroxisome biogenesis disorder 3B, 266510 (3)
PCMT1	0.0442771
SDF4	0.0442759
SLC38A7	0.0442731
ARHGEF39	0.0442725
LGALSL	0.0442571
VWA5B1	0.0442545
GTSE1	0.0442514
ZNF689	0.0442488
CRPPA	0.0442452
RSRP1	0.0442394
TBCA	0.0442392
KHDRBS2	0.0442383	3	0
CDK19	0.0442382
SLC27A6	0.0442378
WDR78	0.0442373
IFNW1	0.0442366
GRB10	0.0442293
TRIP10	0.0442287
ERCC6-PGBD3	0.0442278
AKAP8L	0.0442266
GDA	0.044224	3	0
CISD1	0.0442225
VPS25	0.0442216
TTC27	0.0442191
FABP2	0.0442154
ANP32B	0.0442129
OR51Q1	0.0442129
CNGB1	0.0442116			Retinitis pigmentosa 45, 613767 (3)
PATZ1	0.0442115
C11orf91	0.0442085
LRMP	0.0442077
CAMK2B	0.0442007		1	Mental retardation, autosomal dominant 54, 617799 (3)
IFTAP	0.0442006
ITM2B	0.0441995			?Retinal dystrophy with inner retinal dysfunction and ganglion cell abnormalities, 616079 (3), Dementia, familial British, 176500 (3), Dementia, familial Danish, 117300 (3)
LRRC37A2	0.0441963
COL13A1	0.044196			Myasthenic syndrome, congenital, 19, 616720 (3)
ARHGEF17	0.0441953
OR5B2	0.044195
THOC7	0.0441945
S100A16	0.0441924
ZNRF2	0.0441894
KLHL15	0.0441871			Mental retardation, X-linked 103, 300982 (3)
TXLNG	0.0441868
SERINC2	0.0441819
FAM131A	0.0441786
GRAP2	0.0441778
GPR180	0.0441769
NFE2L2	0.0441745			Immunodeficiency, developmental delay, and hypohomocysteinemia, 617744 (3)
ADGRV1	0.0441738			?Febrile seizures, familial, 4, 604352 (3), Usher syndrome, type 2C, 605472 (3), Usher syndrome, type 2C, GPR98/PDZD7 digenic, 605472 (3)
RGPD2	0.0441731
DGKH	0.0441723
SLCO2B1	0.0441711
FGB	0.0441694			Afibrinogenemia, congenital, 202400 (3), Dysfibrinogenemia, congenital, 616004 (3), Hypofibrinogenemia, congenital, 202400 (3)
TPM3	0.044169			CAP myopathy 1, 609284 (3), Myopathy, congenital, with fiber-type disproportion, 255310 (3), Nemaline myopathy 1, autosomal dominant or recessive, 609284 (3)
CENPI	0.0441675
HCN2	0.044167
ALDH2	0.0441669			Alcohol sensitivity, acute, 610251 (3), {Esophageal cancer, alcohol-related, susceptibility to} (3), {Hangover, susceptibility to}, 610251 (3), {Sublingual nitroglycerin, susceptibility to poor response to} (3)
GPR27	0.0441642
ZNF284	0.0441633
NDUFB3	0.0441632			Mitochondrial complex I deficiency, 252010 (3)
CCNL1	0.0441624
SLC2A4RG	0.044159
C22orf24	0.044159
PRSS12	0.0441563			Mental retardation, autosomal recessive 1, 249500 (3)
MOB1B	0.0441557
SCFD1	0.0441554
ZNF117	0.0441531
TRIM63	0.0441507
ZC2HC1B	0.0441498
LACTB2	0.0441495
SEZ6L2	0.0441491	3	0
ARFIP2	0.0441489
MIEN1	0.0441481
GJB3	0.0441474			Deafness, autosomal dominant 2B, 612644 (3), Deafness, autosomal dominant, with peripheral neuropathy (3), Deafness, autosomal recessive (3), Deafness, digenic, GJB2/GJB3, 220290 (3), Erythrokeratodermia variabilis et progressiva 1, 133200 (3)
GPR183	0.0441464
GSTZ1	0.0441439			[Maleylacetoacetate isomerase deficiency], 617596 (3)
PP2D1	0.0441438
LIG4	0.0441431			LIG4 syndrome, 606593 (3), {Multiple myeloma, resistance to}, 254500 (3)
STOX2	0.0441423
TRIM67	0.0441422
EDAR	0.0441421			Ectodermal dysplasia 10A, hypohidrotic/hair/nail type, autosomal dominant, 129490 (3), Ectodermal dysplasia 10B, hypohidrotic/hair/tooth type, autosomal recessive, 224900 (3), [Hair morphology 1, hair thickness], 612630 (3)
TPSB2	0.0441415
OR56B4	0.0441402
ALG1	0.0441399			Congenital disorder of glycosylation, type Ik, 608540 (3)
ERAP1	0.0441396
C19orf25	0.0441395
LIPJ	0.0441388
GYG2	0.0441378
CD72	0.044137
CD2BP2	0.0441365
CTNNAL1	0.0441344
MMAB	0.0441335			Methylmalonic aciduria, vitamin B12-responsive, due to defect in synthesis of adenosylcobalamin, cblB complementation type, 251110 (3)
GOLGA8J	0.0441334
CAPS2	0.0441331
ZRSR2	0.0441304
TMEM223	0.04413
PIP4P2	0.0441293
DCAF5	0.0441285
WNT16	0.0441275
RBM18	0.044126
SH3RF2	0.0441257
BCL2A1	0.0441249
SVOP	0.0441245
NARF	0.0441236
MECR	0.0441228			Dystonia, childhood-onset, with optic atrophy and basal ganglia abnormalities, 617282 (3)
TRIM46	0.0441221
OGFR	0.0441214
SALL1	0.044121			Townes-Brocks branchiootorenal-like syndrome, 107480 (3), Townes-Brocks syndrome 1, 107480 (3)
OR5M3	0.0441209
PRPF4	0.0441207			Retinitis pigmentosa 70, 615922 (3)
YBEY	0.0441206
DMRTB1	0.0441203
MRPS11	0.0441202
LILRA4	0.0441197
BCL2L15	0.0441196
CDC42BPG	0.0441193
TFPT	0.0441188
NEDD8-MDP1	0.0441187
ZNF492	0.044118
OR4K15	0.0441167
ARSB	0.0441158			Mucopolysaccharidosis type VI (Maroteaux-Lamy), 253200 (3)
SLC25A22	0.0441152			Epileptic encephalopathy, early infantile, 3, 609304 (3)
GNL3	0.0441141
RPSA	0.0441141			Asplenia, isolated congenital, 271400 (3)
DEFB129	0.0441136
MSRB3	0.0441126			Deafness, autosomal recessive 74, 613718 (3)
SLC25A15	0.0441124			Hyperornithinemia-hyperammonemia-homocitrullinemia syndrome, 238970 (3)
RSAD1	0.0441089
GALNT9	0.0441087
TRNAU1AP	0.0441084
FBXL12	0.0441081
SPTBN5	0.044108
MTERF4	0.0441071
FAM47A	0.0441062	3	0
AHSG	0.0441061			?Alopecia-mental retardation syndrome 1, 203650 (3)
SMKR1	0.0441058
CNTNAP1	0.0441048			Lethal congenital contracture syndrome 7, 616286 (3)
DRAM1	0.0441016
PKLR	0.0441004			Adenosine triphosphate, elevated, of erythrocytes, 102900 (3), Pyruvate kinase deficiency, 266200 (3)
C1QL4	0.0441001
ANKRD24	0.0441001
GCNT2P1	0.0440995
FAM111A	0.0440975			Gracile bone dysplasia, 602361 (3), Kenny-Caffey syndrome, type 2, 127000 (3)
SERPINC1	0.0440973			Thrombophilia due to antithrombin III deficiency, 613118 (3)
CBWD3	0.0440963
LEFTY1	0.0440958
PRAMEF6	0.0440953
SP2	0.0440952
FAM83G	0.0440949
DPP8	0.0440946
MRPL22	0.0440944
CD74	0.0440943
KLHL41	0.0440942			Nemaline myopathy 9, 615731 (3)
CKS2	0.0440941
RAB4B	0.0440923
ACSL3	0.0440923
DMAC1	0.0440916
OR2A12	0.0440913
ZNF112	0.0440906
ARMC4	0.0440903			Ciliary dyskinesia, primary, 23, 615451 (3)
TAS2R10	0.0440902
MIB1	0.0440887	3	0	Left ventricular noncompaction 7, 615092 (3)
MFF	0.0440886			Encephalopathy due to defective mitochondrial and peroxisomal fission 2, 617086 (3)
DPYSL3	0.0440878	3	0
LMCD1	0.0440873
GADL1	0.044087
TEAD4	0.0440868
MRPL28	0.0440867
PRDX1	0.0440863			Methylmalonic aciduria and homocystinuria, cblC type, digenic, 277400 (3)
SLC9A1	0.0440859			?Lichtenstein-Knorr syndrome, 616291 (3)
ZNF844	0.0440856
KCNMB3	0.0440852
LCE1F	0.0440848
OR2A7	0.0440845
GLE1	0.0440845			Arthrogryposis, lethal, with anterior horn cell disease, 611890 (3), Lethal congenital contracture syndrome 1, 253310 (3)
FOLH1	0.0440833
RBM8A	0.0440832			Thrombocytopenia-absent radius syndrome, 274000 (3)
OR51F2	0.0440831
MYO1B	0.0440823
TMEM68	0.0440821
TF	0.044082			Atransferrinemia, 209300 (3)
KIRREL3	0.0440819	2	0
FADS6	0.0440819
RBM34	0.0440817
CD180	0.0440811
SLC5A5	0.0440809			Thyroid dyshormonogenesis 1, 274400 (3)
VANGL1	0.0440806			Caudal regression syndrome, 600145 (3), {Neural tube defects, susceptibility to}, 182940 (3)
GFM1	0.0440803			Combined oxidative phosphorylation deficiency 1, 609060 (3)
GYPB	0.0440802			[Blood group, Ss], 111740 (3), {Malaria, resistance to}, 611162 (3)
WDR5	0.0440799
LRIF1	0.0440791
FGF21	0.0440787
TFPI	0.0440781
IL21R	0.0440778			Immunodeficiency 56, 615207 (3), [IgE, elevated level of], 147050 (3)
SFN	0.0440774
TRIM5	0.0440774
PRAMEF14	0.0440771
WDR24	0.0440767
OTUD6A	0.0440758
TMED2	0.0440758
MYC	0.0440756			Burkitt lymphoma, 113970 (3), Myoclonus, familial cortical, 614937 (3)
P2RY13	0.0440756
ZNF541	0.0440741
MSRA	0.0440734
NLN	0.0440729
GPR173	0.0440716
RAP1GAP2	0.0440716
PALM	0.0440703
EPPK1	0.0440702	3	0
MORN1	0.04407
SHLD2	0.0440694
LRP12	0.044069
OR51T1	0.0440685
CFD	0.0440685			Complement factor D deficiency, 613912 (3)
CHRD	0.0440673
MIDN	0.0440663
ERCC2	0.044066			?Cerebrooculofacioskeletal syndrome 2, 610756 (3), Trichothiodystrophy 1, photosensitive, 601675 (3), Xeroderma pigmentosum, group D, 278730 (3)
IBSP	0.044066
AP1B1	0.0440655
AKIRIN2	0.0440655
OR5L2	0.0440654
KCNH3	0.0440652
PSMC3IP	0.0440635			Ovarian dysgenesis 3, 614324 (3)
CLDN18	0.0440635
MTHFSD	0.0440632
RFESD	0.0440627
ERVMER34-1	0.0440609
GAL3ST2	0.0440605
SMOC2	0.0440603			Dentin dysplasia, type I, with microdontia and misshapen teeth, 125400 (3)
OR10C1	0.0440603
BFSP2	0.04406			Cataract 12, multiple types, 611597 (3)
MAD2L1BP	0.0440597
COX6A1P2	0.0440595
SLC9A6	0.0440579	1	0	Mental retardation, X-linked syndromic, Christianson type, 300243 (3)
MC1R	0.0440567			[Analgesia from kappa-opioid receptor agonist, female-specific], 613098 (3), [Skin/hair/eye pigmentation 2, blond hair/fair skin], 266300 (3), [Skin/hair/eye pigmentation 2, red hair/fair skin], 266300 (3), {Albinism, oculocutaneous, type II, modifier of}, 203200 (3), {Melanoma, cutaneous malignant, 5}, 613099 (3), {UV-induced skin damage}, 266300 (3)
LIMS2	0.0440566			Muscular dystrophy, limb-girdle, type 2W, 616827 (3)
SLCO4A1	0.0440562
PPP1R16B	0.044056
FAM71E2	0.0440559
ZCWPW1	0.0440558
AGAP2-AS1	0.0440552
FOXN4	0.0440548
CFAP100	0.0440541
RPUSD1	0.0440536
EXOC8	0.0440536
VAC14	0.0440532			Striatonigral degeneration, childhood-onset, 617054 (3)
CELA3A	0.0440527
RTKN	0.0440526
SPIN1	0.0440519
RFX1	0.0440512
SENP6	0.0440509
TMEM78	0.0440508
PTGER4	0.0440506
UHRF2	0.04405
CCDC85C	0.0440498
KCTD20	0.0440495
DENR	0.0440491	2	0
ORC5	0.0440491
STARD8	0.0440489
XPOT	0.0440486
KRTAP10-9	0.0440475
CCDC50	0.0440467			?Deafness, autosomal dominant 44, 607453 (3)
FLACC1	0.0440467
VIM	0.0440464			Cataract 30, pulverulent, 116300 (3)
RAB3IL1	0.0440457
KIF19	0.0440456
CEP89	0.0440453
RPLP1	0.044045
C1orf147	0.0440449
KLRF2	0.0440447
MTPN	0.0440446
PAH	0.0440445	1	0	Phenylketonuria, 261600 (3), [Hyperphenylalaninemia, non-PKU mild], 261600 (3)
CEBPD	0.0440445
DLX3	0.0440445	2	0	Amelogenesis imperfecta, type IV, 104510 (3), Trichodontoosseous syndrome, 190320 (3)
CREG1	0.0440441
HDAC1	0.044043
PPP1R17	0.0440429
ZNF486	0.0440427
DUSP18	0.0440424
VPS33B	0.0440421			Arthrogryposis, renal dysfunction, and cholestasis 1, 208085 (3)
CENPS	0.044042
MFAP3	0.0440419
ATG101	0.0440415
CDKN1B	0.0440413			Multiple endocrine neoplasia, type IV, 610755 (3)
PRR4	0.0440409			Ectodermal dysplasia-syndactyly syndrome 1, 613573 (3)
MTX2	0.0440407
POLR3E	0.0440404
RACGAP1	0.04404
GGT2	0.0440392			[Gamma-glutamyltransferase, familial high serum] (2)
ITGA7	0.0440391			Muscular dystrophy, congenital, due to ITGA7 deficiency, 613204 (3)
PTGFRN	0.0440382
PAK3	0.0440374			Mental retardation, X-linked 30/47, 300558 (3)
PRPS1	0.0440373			Arts syndrome, 301835 (3), Charcot-Marie-Tooth disease, X-linked recessive, 5, 311070 (3), Deafness, X-linked 1, 304500 (3), Gout, PRPS-related, 300661 (3), Phosphoribosylpyrophosphate synthetase superactivity, 300661 (3)
OPRM1	0.0440367
KRT35	0.0440364
ARMCX5	0.0440362
TWNK	0.0440359			Mitochondrial DNA depletion syndrome 7 (hepatocerebral type), 271245 (3), Perrault syndrome 5, 616138 (3), Progressive external ophthalmoplegia with mitochondrial DNA deletions, autosomal dominant 3, 609286 (3)
PROSER1	0.0440352
TRPV4	0.044035			?Avascular necrosis of femoral head, primary, 2, 617383 (3), Brachyolmia type 3, 113500 (3), Digital arthropathy-brachydactyly, familial, 606835 (3), Hereditary motor and sensory neuropathy, type IIc, 606071 (3), Metatropic dysplasia, 156530 (3), Parastremmatic dwarfism, 168400 (3), SED, Maroteaux type, 184095 (3), Scapuloperoneal spinal muscular atrophy, 181405 (3), Spinal muscular atrophy, dist…
GPR17	0.0440349
ACSL5	0.0440344
MAFK	0.0440341
VGLL1	0.044034
PKN2	0.0440327
TMED7-TICAM2	0.0440324
ABCC4	0.0440322
DHRS1	0.0440322
VEPH1	0.0440318
DIP2B	0.0440318			Mental retardation, FRA12A type, 136630 (3)
SCML1	0.0440315
TRDN	0.0440302			Ventricular tachycardia, catecholaminergic polymorphic, 5, with or without muscle weakness, 615441 (3)
LINC01599	0.0440302
SMARCB1	0.0440301			Coffin-Siris syndrome 3, 614608 (3), Rhabdoid tumors, somatic, 609322 (3), {Rhabdoid tumor predisposition syndrome 1}, 609322 (3), {Schwannomatosis-1, susceptibility to}, 162091 (3)
PODXL	0.0440301
ZNF432	0.0440301
SMAD6	0.04403			Aortic valve disease 2, 614823 (3), {Craniosynostosis 7, susceptibility to}, 617439 (3)
MRPL54	0.0440297
PNLIPRP1	0.0440295
TSPAN31	0.0440292
NXN	0.0440291
NOL10	0.044029
LZTS1	0.0440288			Esophageal squamous cell carcinoma, 133239 (3)
PPM1G	0.0440286
AMELX	0.0440285			Amelogenesis imperfecta, type 1E, 301200 (3)
DARS2	0.0440279			Leukoencephalopathy with brain stem and spinal cord involvement and lactate elevation, 611105 (3)
SLC22A12	0.0440279			Hypouricemia, renal, 220150 (3)
KRTAP10-7	0.0440278
UMODL1	0.0440275
OR7A10	0.0440274
SLC16A1	0.0440273			Erythrocyte lactate transporter defect, 245340 (3), Hyperinsulinemic hypoglycemia, familial, 7, 610021 (3), Monocarboxylate transporter 1 deficiency, 616095 (3)
PI3	0.0440273
P2RX3	0.0440272
PEX7	0.0440268	3	0	Peroxisome biogenesis disorder 9B, 614879 (3), Rhizomelic chondrodysplasia punctata, type 1, 215100 (3)
HPSE2	0.0440267			Urofacial syndrome 1, 236730 (3)
SMYD1	0.0440266
NLRP1	0.0440263			Autoinflammation with arthritis and dyskeratosis, 617388 (3), Palmoplantar carcinoma, multiple self-healing, 615225 (3), {Vitiligo-associated multiple autoimmune disease susceptibility 1}, 606579 (3)
ANKRD35	0.0440261
LSMEM1	0.0440261
DEUP1	0.0440259
NDUFS4	0.0440254			Leigh syndrome, 256000 (3), Mitochondrial complex I deficiency, 252010 (3)
SSR1	0.0440254
TM6SF1	0.0440247
SENP5	0.0440245
BRK1	0.0440236
PRR15	0.0440232
MMS22L	0.0440226
HLA-DMA	0.0440226
PARPBP	0.0440224
GNAI2	0.044022			Pituitary ACTH-secreting adenoma (3), Ventricular tachycardia, idiopathic, 192605 (3)
RBMY1F	0.044022
PPP4R1	0.0440217
GRM2	0.0440215
CATSPERE	0.0440214
PIRT	0.044021
SPATA19	0.0440205
PARS2	0.0440203
IL18BP	0.0440202
MAS1	0.0440198
C12orf49	0.0440195
DKC1	0.0440181			Dyskeratosis congenita, X-linked, 305000 (3)
UBE2V1	0.0440177
TAS2R38	0.0440167			[Phenylthiocarbamide tasting], 171200 (3)
ZNF383	0.0440166
M1AP	0.0440164
LETM1	0.044016
TTLL10	0.0440159
CS	0.0440158
MAU2	0.0440157
RDH13	0.0440151
GAL3ST3	0.044015
ATP11B	0.044015
ODF3L1	0.0440144
IFNK	0.0440143
C12orf77	0.0440142
MMUT	0.0440138
GINM1	0.0440136
TMEM163	0.0440134
SOX12	0.0440128
C15orf61	0.0440128
NOL11	0.0440128
RNF24	0.0440124
NPIPA1	0.0440122
TAF3	0.044012
BTG3	0.0440116
CER1	0.0440112
SLC66A2	0.0440111
TULP3	0.044011
SMIM30	0.0440105
GOT1L1	0.0440104
SNRPC	0.0440104
WEE2	0.0440094			Oocyte maturation defect 5, 617996 (3)
ADAMTS12	0.0440094
ARHGAP9	0.0440093
GATA4	0.0440092			?Testicular anomalies with or without congenital heart disease, 615542 (3), Atrial septal defect 2, 607941 (3), Atrioventricular septal defect 4, 614430 (3), Tetralogy of Fallot, 187500 (3), Ventricular septal defect 1, 614429 (3)
C9orf92	0.044009
RPP25	0.0440084
ITGA10	0.0440081
MAGEB16	0.0440079
PCDHGA1	0.0440076
SH2B2	0.0440075
CPLANE2	0.0440074
ADAMTS15	0.0440074
CCDC170	0.0440073
IL13RA2	0.044007
RIT2	0.0440068	3	0
MTSS2	0.0440064
XYLB	0.0440063
LPL	0.044006			Combined hyperlipidemia, familial, 144250 (3), Lipoprotein lipase deficiency, 238600 (3), [High density lipoprotein cholesterol level QTL 11] (3)
SERPINH1	0.0440059			Osteogenesis imperfecta, type X, 613848 (3), {Preterm premature rupture of the membranes, susceptibility to}, 610504 (3)
NOTUM	0.0440058
C18orf25	0.0440055
MAGEA1	0.0440054
MBNL3	0.0440053
IL7	0.0440052
PLEKHO2	0.0440052
LIN7C	0.044005
ZNF691	0.0440049
ZNF106	0.0440049
NDUFA2	0.0440046			Leigh syndrome due to mitochondrial complex I deficiency, 256000 (3)
SLC1A6	0.0440043
GALNT11	0.0440042
KIAA0355	0.0440041
TRAPPC1	0.0440041
SLFNL1	0.044004
PCDH7	0.044004
GPR179	0.0440039			Night blindness, congenital stationary (complete), 1E, autosomal recessive, 614565 (3)
MVB12A	0.0440034
BCL11B	0.0440032			?Immunodeficiency 49, 617237 (3)
VEZT	0.0440032
OR52L1	0.0440029
TMEM198	0.0440025
FAM27B	0.0440024
MYT1	0.0440022
NLRX1	0.044002
RAET1E	0.0440017
FSCN3	0.0440016
SEC14L6	0.0440014
RAB36	0.0440008
DEF6	0.0440007
KRTAP9-4	0.0440003
CXCL11	0.0439995
TCP1	0.0439993
SULT4A1	0.043999
KLHL26	0.0439988
ZC2HC1A	0.0439987
PRR5L	0.0439984
LILRB5	0.0439983
PRXL2B	0.0439983
SLC5A6	0.0439981
UBE2C	0.043998
NUDT21	0.0439979
TUBA4A	0.0439975			Amyotrophic lateral sclerosis 22 with or without frontotemporal dementia, 616208 (3)
TRAF6	0.0439974
KLHDC8B	0.0439973			{Hodgkin lymphoma, susceptibility to}, 236000 (3)
ARMCX6	0.0439972
OLIG3	0.0439968
RPEL1	0.0439958
RASAL1	0.0439954
SLC26A7	0.0439951
PHYHIPL	0.0439951
GDPD5	0.0439951
PPM1J	0.043995
SLC26A3	0.0439945			Diarrhea 1, secretory chloride, congenital, 214700 (3)
ZFP30	0.0439943
MCFD2	0.0439941			Factor V and factor VIII, combined deficiency of, 613625 (3)
BTC	0.0439939
SEC22A	0.0439934
ENO1	0.0439933			Enolase deficiency (1)
LMO7DN	0.0439931
PARP10	0.0439929
ZNF764	0.0439929
TMEM80	0.0439924
CHP1	0.0439924
NOL12	0.043992
CCR9	0.0439918
OR2T5	0.0439918
TAL1	0.0439913			Leukemia, T-cell acute lymphocytic, somatic, 613065 (3)
GTF2H5	0.0439911			Trichothiodystrophy 3, photosensitive, 616395 (3)
HIRIP3	0.0439911
PDZRN4	0.0439907
CHST15	0.0439905
NELFB	0.0439904
KLF12	0.0439903
TMEM38B	0.0439902			Osteogenesis imperfecta, type XIV, 615066 (3)
CREB3L3	0.0439902
FLT1	0.04399
DNAH9	0.0439898
UMAD1	0.0439897
ZNF580	0.0439897
RBM3	0.0439892
TAS2R60	0.0439888
PHF11	0.0439886
HAUS5	0.0439885
PLBD2	0.0439881
BMX	0.0439881
ZBTB17	0.0439877
COL14A1	0.0439875
AKT1S1	0.0439873
CDKL3	0.0439872
LHX2	0.0439865
HOXD10	0.0439864			Charcot-Marie-Tooth disease, foot deformity of, 192950 (3), Vertical talus, congenital, 192950 (3)
SEC23A	0.0439864			Craniolenticulosutural dysplasia, 607812 (3)
ATP2C2	0.0439863
PLCB4	0.0439862			Auriculocondylar syndrome 2, 614669 (3)
PROSER3	0.0439862
FBXL7	0.0439861
NAA16	0.0439859
ARHGEF6	0.0439857			?Mental retardation, X-linked 46, 300436 (3)
TMEM71	0.0439856
GSPT1	0.0439852
GSTM4	0.0439848
CAMSAP3	0.0439844
C2orf81	0.0439843
CLIP3	0.0439842
NT5DC3	0.0439842
CCDC58	0.0439842
STON1-GTF2A1L	0.0439841
CLMP	0.0439841			Congenital short bowel syndrome, 615237 (3)
CD83	0.0439841
KRT83	0.0439838			Erythrokeratodermia variabilis et progressiva 5, 617756 (3), Monilethrix, 158000 (3)
RAB25	0.0439837
FOXE3	0.0439834			Anterior segment dysgenesis 2, multiple subtypes, 610256 (3), Cataract 34, multiple types, 612968 (3), {Aortic aneurysm, familial thoracic 11, susceptibility to}, 617349 (3)
THUMPD1	0.0439834
PAEP	0.0439832
FCN2	0.0439832
OR4D1	0.0439828
SLC22A18	0.0439825
DEDD	0.0439824
RPL14	0.0439824
UEVLD	0.0439822
RUSC2	0.0439822			Mental retardation, autosomal recessive 61, 617773 (3)
APPL1	0.0439818			{Maturity-onset diabetes of the young, type 14}, 616511 (3)
FRMPD3	0.0439816
AURKC	0.0439815			Spermatogenic failure 5, 243060 (3)
TEX15	0.0439809			Spermatogenic failure 25, 617960 (3)
RIMBP3B	0.0439809
ATXN3L	0.0439808
ALKBH5	0.0439805
SPPL3	0.0439804
ZNF280B	0.0439804
AP3B2	0.0439803			Epileptic encephalopathy, early infantile, 48, 617276 (3)
CWH43	0.0439803
EMCN	0.04398
PIK3R5	0.04398			Ataxia-oculomotor apraxia 3, 615217 (3)
ALYREF	0.0439798
DSG2	0.0439797			Arrhythmogenic right ventricular dysplasia 10, 610193 (3), Cardiomyopathy, dilated, 1BB, 612877 (3)
ACTR5	0.0439795
SLC2A13	0.0439795
DDX20	0.0439792
TMEM258	0.0439791
ADCK2	0.0439789
SLC1A3	0.0439789			Episodic ataxia, type 6, 612656 (3)
OR10D3	0.0439789
NFKBIB	0.0439785
VPS51	0.0439782
ARAF	0.0439779
MOBP	0.0439778
BEST3	0.0439774
SPICE1	0.0439773
JMJD7-PLA2G4B	0.0439773
PRKCA	0.0439773	3	0	Pituitary tumor, invasive (3)
PRAMEF19	0.0439771
TMEM109	0.0439771
PPP5C	0.0439769	1	0
FBLL1	0.0439769
TUBB4B	0.0439769			Leber congenital amaurosis with early-onset deafness, 617879 (3)
GTF2H4	0.0439768
CCDC39	0.0439764			Ciliary dyskinesia, primary, 14, 613807 (3)
TMEM130	0.0439764
ITPKB	0.043976
C3orf70	0.0439759
ABHD3	0.0439758
BMP1	0.0439754			Osteogenesis imperfecta, type XIII, 614856 (3)
OR4M1	0.0439753
NKAIN2	0.0439753
LRATD1	0.0439752
XRCC2	0.0439751			?Fanconi anemia, complementation group U, 617247 (3)
SPATA33	0.0439744
NSUN4	0.0439743
KATNA1	0.0439742
ZNF607	0.0439741
OBSCN-AS1	0.043974
MSMB	0.0439739			{Prostate cancer, hereditary, 13}, 611928 (3)
SRSF5	0.0439739
HINT1	0.0439739			Neuromyotonia and axonal neuropathy, autosomal recessive, 137200 (3)
RIIAD1	0.0439737
PRMT3	0.0439734
RXRG	0.0439733
THBS2	0.0439731			{Lumbar disc herniation, susceptibility to}, 603932 (3)
OCIAD1	0.043973
OR1Q1	0.043973
GZF1	0.0439729			Joint laxity, short stature, and myopia, 617662 (3)
SGCD	0.0439728			Cardiomyopathy, dilated, 1L, 606685 (3), Muscular dystrophy, limb-girdle, type 2F, 601287 (3)
LDHA	0.0439726			Glycogen storage disease XI, 612933 (3)
ECT2L	0.0439724
C2CD2L	0.0439722
CEACAM8	0.0439721
LGALS1	0.0439721
EIF5B	0.043972
IL22RA2	0.0439716
KRTAP10-10	0.0439714
GALNT2	0.0439714		1
PCDH12	0.0439712			Microcephaly, seizures, spasticity, and brain calcification, 251280 (3), Microcephaly, seizures, spasticity, and brain calcification, 251280 (3)
NBPF12	0.0439709
ACADS	0.0439704			Acyl-CoA dehydrogenase, short-chain, deficiency of, 201470 (3)
GLIPR1	0.0439698
POTEI	0.0439696
GSX1	0.0439696
MLH1	0.0439696			Colorectal cancer, hereditary nonpolyposis, type 2, 609310 (3), Mismatch repair cancer syndrome, 276300 (3), Muir-Torre syndrome, 158320 (3)
EMC7	0.0439695
FOXK2	0.0439693
MYH3	0.0439692			Arthrogryposis, distal, type 2A, 193700 (3), Arthrogryposis, distal, type 2B, 601680 (3), Arthrogryposis, distal, type 8, 178110 (3)
SLC25A47	0.043969
IDI2	0.0439686
CEP63	0.0439686			?Seckel syndrome 6, 614728 (3)
OR51E2	0.043968
KCNJ14	0.043968
ANHX	0.043968
TNFRSF4	0.0439679			?Immunodeficiency 16, 615593 (3)
SAMD11	0.0439678	3	0
ZNF519	0.0439673
FAM163A	0.0439673
C17orf64	0.0439673
SERPINA7	0.0439672
REG1B	0.0439671
HEG1	0.0439667
JPH3	0.0439667			?Huntington disease-like 2, 606438 (3)
ZNF396	0.0439667
TFF2	0.0439665
SCGB1D2	0.0439663
ABCD3	0.0439662			?Bile acid synthesis defect, congenital, 5, 616278 (3)
IQCB1	0.0439661			Senior-Loken syndrome 5, 609254 (3)
PTGIR	0.043966
ZHX3	0.043966
FZD4	0.043966			Exudative vitreoretinopathy 1, 133780 (3), Retinopathy of prematurity, 133780 (3)
CDK12	0.0439657
ANO1	0.0439656
TEX19	0.0439654
IRF2	0.0439651
DNAJB12	0.0439651
ITGA1	0.0439648
USP39	0.0439644
RFK	0.0439644
CRACD	0.0439643
GPCPD1	0.0439639
SLC18A1	0.0439639
OR4F17	0.0439638
SLCO3A1	0.0439635
C4B	0.0439635	3	0	C4B deficiency, 614379 (3)
LCTL	0.0439634
ISX	0.0439629
SART1	0.0439629
PGBD5	0.0439628
ODAM	0.043962
TMEM267	0.043962
DPM2	0.0439619			Congenital disorder of glycosylation, type Iu, 615042 (3)
WWC3	0.0439618
PRELID2	0.0439618
PAN3	0.0439617
F13A1	0.043961			Factor XIIIA deficiency, 613225 (3), {Myocardial infarction, protection against}, 608446 (3), {Venous thrombosis, protection against}, 188050 (3)
RTL3	0.0439605
PRR23A	0.0439605
RCCD1	0.0439603
C9orf16	0.0439602
AMY1C	0.0439602
ETV3	0.0439602
MC3R	0.0439597			{Mycobacterium tuberculosis, protection against}, 607948 (3), {Obesity, severe, susceptibility to, BMIQ9}, 602025 (3)
NAGK	0.0439597
PLK5	0.043959
ADAMTSL4	0.043959			Ectopia lentis et pupillae, 225200 (3), Ectopia lentis, isolated, autosomal recessive, 225100 (3)
MEGF8	0.0439588			Carpenter syndrome 2, 614976 (3)
MRGPRE	0.0439588
PDE5A	0.0439588
LRRC6	0.0439584			Ciliary dyskinesia, primary, 19, 614935 (3)
ST3GAL4	0.0439583
EDDM3A	0.0439582
OR5AR1	0.0439581
HSBP1L1	0.043958
TMEM89	0.0439578
RASSF1	0.0439577			Lung cancer, 211980 (2)
ZNF563	0.0439575
SLC16A5	0.0439574
GPR182	0.043957
MAP10	0.0439569
SF3A3	0.0439568
GLI4	0.0439568
PRDM5	0.0439565			Brittle cornea syndrome 2, 614170 (3)
HLTF	0.0439564
CRIP3	0.0439561
C11orf21	0.0439561
BCAP29	0.043956
CCDC15	0.0439558
KRT34	0.0439558
TARBP2	0.0439554
BLM	0.0439553			Bloom syndrome, 210900 (3)
PCDHB17P	0.0439553
TADA2B	0.0439553
ZBED2	0.043955
KIAA1107	0.0439549
ANKRD30B	0.0439544
GINS4	0.0439544
OR4F15	0.0439544
DHRS13	0.0439544
CENPT	0.0439542
RPE	0.0439542
KDM4A	0.0439541
AQP5	0.0439539			Palmoplantar keratoderma, Bothnian type, 600231 (3)
INO80B	0.0439538
ZNF195	0.0439538
POTEE	0.0439537
PTPN12	0.0439533			Colon cancer, somatic, 114500 (3)
SAXO2	0.0439532
SH3D21	0.0439531
EDA	0.043953			Ectodermal dysplasia 1, hypohidrotic, X-linked, 305100 (3), Tooth agenesis, selective, X-linked 1, 313500 (3)
NUTM2G	0.0439528
TMEM19	0.0439527
GSDMB	0.0439526
UBE2L3	0.0439526
DEFB132	0.0439525
COPG2	0.0439523
GAS2	0.0439522	3	0
HIGD2B	0.0439521
ARPC5L	0.0439521
GPX6	0.043952
ZNF43	0.043952
IGFL1	0.043952
SAXO1	0.0439519
THEMIS2	0.0439518
C11orf58	0.0439515
SMURF2	0.0439513
SLC2A8	0.0439512
UPRT	0.0439511
FAM181B	0.0439511
PRSS53	0.0439511
OSCP1	0.043951
KRT71	0.0439507			?Hypotrichosis 13, 615896 (3)
TTC3	0.0439507
LENG9	0.0439504
SCNN1A	0.04395			Bronchiectasis with or without elevated sweat chloride 2, 613021 (3), Pseudohypoaldosteronism, type I, 264350 (3)
PCDHB2	0.04395
BHLHB9	0.0439499
ZIC5	0.0439497
ADAMTS18	0.0439494			Microcornea, myopic chorioretinal atrophy, and telecanthus, 615458 (3)
TRAM1L1	0.0439493
RPS9	0.0439492
INPP5F	0.0439491
TP53I11	0.043949
GRIP1	0.0439488	2	0	Fraser syndrome 3, 617667 (3)
CYP11B2	0.0439487			Aldosterone to renin ratio raised (3), Hypoaldosteronism, congenital, due to CMO I deficiency, 203400 (3), Hypoaldosteronism, congenital, due to CMO II deficiency, 610600 (3), {Low renin hypertension, susceptibility to} (3)
REV3L	0.0439485
GOLGA6C	0.0439481
ENAM	0.0439479			Amelogenesis imperfecta, type IB, 104500 (3), Amelogenesis imperfecta, type IC, 204650 (3)
YEATS2	0.0439478	3	0
ELF3	0.0439477
CENPC	0.0439477
BHLHA9	0.0439475			?Camptosynpolydactyly, complex, 607539 (3), Syndactyly, mesoaxial synostotic, with phalangeal reduction, 609432 (3)
NOD1	0.0439475
GATD1	0.0439473
GAB3	0.0439472
SLC22A1	0.0439467
ZC3H7B	0.0439465
CSGALNACT2	0.0439465
LENEP	0.0439463
TESC	0.0439463
GPR50	0.0439461
OPTC	0.043946
NODAL	0.0439456			Heterotaxy, visceral, 5, 270100 (3)
OR1E2	0.0439456
C2orf78	0.0439456
PPP1R3A	0.0439455			Insulin resistance, severe, digenic, 125853 (3)
RC3H1	0.0439454
KRTAP12-2	0.0439453
OASL	0.0439453
HCN1	0.0439452		1	Epileptic encephalopathy, early infantile, 24, 615871 (3)
S100A14	0.0439452
H2BC3	0.0439446
HELT	0.0439446
RPL10	0.0439444	3	0	Mental retardation, X-linked, syndromic, 35, 300998 (3), {Autism, susceptibility to, X-linked 5}, 300847 (3)
MPP2	0.0439443
ITPRID2	0.0439443
EDRF1	0.043944
AAMP	0.043944
C1orf127	0.0439439
FN3K	0.0439439
PKNOX2	0.0439436
SAAL1	0.0439435
KIF20B	0.0439431
USP27X	0.0439429			Mental retardation, X-linked 105, 300984 (3)
OR2K2	0.0439428
OR2L5	0.0439424
MBIP	0.043942
TEDC2	0.043942
CPA1	0.043942
C18orf21	0.0439419
ATP5F1EP2	0.0439418
C5orf51	0.0439417
MLC1	0.0439417			Megalencephalic leukoencephalopathy with subcortical cysts, 604004 (3)
EDARADD	0.0439416			Ectodermal dysplasia 11A, hypohidrotic/hair/tooth type, autosomal dominant, 614940 (3), Ectodermal dysplasia 11B, hypohidrotic/hair/tooth type, autosomal recessive, 614941 (3)
LRP8	0.0439415			{Myocardial infarction, susceptibility to}, 608446 (3)
TLCD4	0.0439413
NPM3	0.0439407
MMP10	0.0439407
BOD1L2	0.0439405
KRTAP10-8	0.0439402
TBXAS1	0.0439401			?Thromboxane synthase deficiency, 614158 (1), Ghosal hematodiaphyseal syndrome, 231095 (3)
MRPL45	0.0439398
OR10H1	0.0439398
SIM1	0.0439396			Obesity, severe, 601665 (3)
BTBD17	0.0439394
VAX2	0.0439392
WBP1	0.0439387
RLN2	0.0439387
SERPINA9	0.0439386
EFCAB2	0.0439385
SHOC1	0.0439385
DCAF10	0.0439385
SI	0.0439385			Sucrase-isomaltase deficiency, congenital, 222900 (3)
MBD1	0.0439383	3	0
PSMB5	0.043938
SOX1	0.0439373
NKAIN3	0.0439372
FBXL19	0.043937
VPS26A	0.043937
NCEH1	0.0439368
HPX	0.0439368
NLGN3	0.0439368	1	0	{Asperger syndrome susceptibility, X-linked 1}, 300494 (3), {Autism susceptibility, X-linked 1}, 300425 (3)
CRYBB1	0.0439368			Cataract 17, multiple types, 611544 (3)
SHOX	0.0439367	2	0	Langer mesomelic dysplasia, 249700 (3), Leri-Weill dyschondrosteosis, 127300 (3), Short stature, idiopathic familial, 300582 (3)
SVEP1	0.0439364
ABCA10	0.0439363	3	0
CNN2	0.0439362
MAGEA12	0.0439362
VN1R2	0.043936
PRKAA1	0.0439356
TET2	0.0439356	2	0	Myelodysplastic syndrome, somatic, 614286 (3)
ATOH8	0.0439353
IFNL1	0.0439353
SERINC5	0.0439348
HNF1B	0.0439347			Diabetes mellitus, noninsulin-dependent, 125853 (3), Renal cysts and diabetes syndrome, 137920 (3), {Renal cell carcinoma}, 144700 (3)
TPD52L3	0.0439342
N4BP2	0.0439342
ECEL1	0.0439331			Arthrogryposis, distal, type 5D, 615065 (3)
PYGM	0.0439331			McArdle disease, 232600 (3)
ATG16L2	0.0439329
PEX2	0.0439329			Peroxisome biogenesis disorder 5A (Zellweger), 614866 (3), Peroxisome biogenesis disorder 5B, 614867 (3)
DYNLT1	0.0439329
SPRTN	0.0439328			Ruijs-Aalfs syndrome, 616200 (3)
FBXW4	0.0439328
ERC2	0.0439325
GADD45G	0.0439321
PSMD2	0.0439321
CCDC126	0.0439319
LPA	0.0439315			[LPA deficiency, congenital] (3), {Coronary artery disease, susceptibility to} (1)
RNF141	0.0439312
BLOC1S5	0.0439311
POLH	0.0439311			Xeroderma pigmentosum, variant type, 278750 (3)
LRFN4	0.0439308
PLRG1	0.0439307
NENF	0.0439306
UBE2G1	0.0439301
LINC01387	0.0439301
MSMO1	0.04393			Microcephaly, congenital cataract, and psoriasiform dermatitis, 616834 (3)
CEACAM3	0.0439295
RAPGEFL1	0.0439291
CDK18	0.043929
APOM	0.0439289
OR1D2	0.0439289
RPL7	0.0439286
H2AC21	0.0439286
HEXB	0.0439284			Sandhoff disease, infantile, juvenile, and adult forms, 268800 (3)
AMDHD1	0.0439283
SH2D4B	0.0439282
CDNF	0.0439281
IER5L	0.043928
SELENOH	0.043928
CMTM5	0.0439279
ARHGAP39	0.0439279
TMEM196	0.0439277
TMEM200B	0.0439277
STN1	0.0439277			Cerebroretinal microangiopathy with calcifications and cysts 2, 617341 (3)
TMEM41B	0.0439275
USP33	0.043927
POLR3F	0.0439268
SMIM29	0.0439267
FAM13B	0.0439266
AQP12A	0.0439265
INHBB	0.0439263
DAP3	0.0439263
POLD4	0.0439262
UACA	0.0439262
CHADL	0.043926
MS4A6E	0.043926
WDHD1	0.0439258
RGS10	0.0439258
PON1	0.0439256	2	0	{Coronary artery disease, susceptibility to} (3), {Coronary artery spasm 2, susceptibility to (3), {Microvascular complications of diabetes 5}, 612633 (3), {Organophosphate poisoning, sensitivity to} (3)
MAOA	0.0439254	3	0	Brunner syndrome, 300615 (3), {Antisocial behavior}, 300615 (3)
KXD1	0.0439254
GATA5	0.0439251			Congenital heart defects, multiple types, 5, 617912 (3)
NUDT18	0.0439248
GPR34	0.0439247
CUL7	0.0439244	2	0	3-M syndrome 1, 273750 (3)
RAB5B	0.0439244
MCOLN1	0.0439243			Mucolipidosis IV, 252650 (3)
GADD45B	0.0439243
CEP78	0.0439243			Cone-rod dystrophy and hearing loss, 617236 (3)
RP1	0.0439242			Retinitis pigmentosa 1, 180100 (3), Symmetric circumferential skin creases, congenital, 2, 616734 (3)
TMX2	0.043924
FRMPD1	0.043924
TMEM150C	0.043924
SOX13	0.0439238
LTBP3	0.0439238			?Weill-Marchesani syndrome 3, recessive, 614819 (3), Dental anomalies and short stature, 601216 (3), Geleophysic dysplasia 3, 617809 (3), Glaucoma 3, primary congenital, D, 613086 (3), Microspherophakia and/or megalocornea, with ectopia lentis and with or without secondary glaucoma, 251750 (3)
LYPD6	0.0439237
RBM48	0.0439236
SUN5	0.0439236			Spermatogenic failure 16, 617187 (3)
OR9Q1	0.0439234
CNPY2	0.0439232
KRT39	0.0439232
ZNF385A	0.0439232
CD5	0.0439231
CPXM1	0.0439227
MTCL1	0.0439227
GPC5	0.0439227
PANK1	0.0439224
EVI5L	0.0439223
FBP2	0.0439223
FGF20	0.0439223			?Renal hypodysplasia/aplasia 2, 615721 (3)
PCDHAC1	0.0439221	3	0
VWA1	0.0439221
MANEA	0.043922
CD69	0.0439217
WFDC1	0.0439217
GLP2R	0.0439216
TMEM120B	0.0439215
MYLK2	0.0439214			Cardiomyopathy, hypertrophic, 1, digenic, 192600 (3)
OR4E2	0.0439213
CCDC78	0.0439213			?Centronuclear myopathy 4, 614807 (3)
CD34	0.0439213
CNDP1	0.0439213
ACTB	0.0439212	1	1	?Dystonia, juvenile-onset, 607371 (3), Baraitser-Winter syndrome 1, 243310 (3)
LYZL4	0.0439212
IDH1	0.043921			{Glioma, susceptibility to, somatic}, 137800 (3)
CHRND	0.0439206			?Myasthenic syndrome, congenital, 3A, slow-channel, 616321 (3), ?Myasthenic syndrome, congenital, 3C, associated with acetylcholine receptor deficiency, 616323 (3), Multiple pterygium syndrome, lethal type, 253290 (3), Myasthenic syndrome, congenital, 3B, fast-channel, 616322 (3)
VPS37A	0.0439205			Spastic paraplegia 53, autosomal recessive, 614898 (3)
OSBPL7	0.0439205
TMEM59	0.0439205
L1TD1	0.0439204
RAVER1	0.0439204
HAUS3	0.0439203
TMEFF1	0.0439203
SPR	0.0439201			Dystonia, dopa-responsive, due to sepiapterin reductase deficiency, 612716 (3)
FOXF2	0.0439198
SLC26A2	0.0439197			Achondrogenesis Ib, 600972 (3), Atelosteogenesis, type II, 256050 (3), De la Chapelle dysplasia, 256050 (3), Diastrophic dysplasia, 222600 (3), Diastrophic dysplasia, broad bone-platyspondylic variant, 222600 (3), Epiphyseal dysplasia, multiple, 4, 226900 (3)
C17orf58	0.0439197
PRR22	0.0439196
EGFR	0.0439192			?Inflammatory skin and bowel disease, neonatal, 2, 616069 (3), Adenocarcinoma of lung, response to tyrosine kinase inhibitor in, 211980 (3), Nonsmall cell lung cancer, response to tyrosine kinase inhibitor in, 211980 (3), {Nonsmall cell lung cancer, susceptibility to}, 211980 (3)
RAB7A	0.0439191
ALPK3	0.0439191
ENKUR	0.0439191
GRID1	0.043919	2	0
TTYH3	0.043919
PWWP3B	0.0439188
CYP2F1	0.0439187
TSSK3	0.0439186
RABGAP1	0.0439185
RPL9	0.0439183
MUC12	0.0439182	3	0
KL	0.0439181			?Tumoral calcinosis, hyperphosphatemic, familial, 3, 617994 (3)
FAM220A	0.043918
CLCN3	0.043918
PTER	0.0439179
CIITA	0.0439179			Bare lymphocyte syndrome, type II, complementation group A, 209920 (3), {Rheumatoid arthritis, susceptibility to}, 180300 (3)
TRPM8	0.0439179
QSER1	0.0439179
TREML1	0.0439177
LINC02877	0.0439177
RNF217	0.0439176
EPS8	0.0439175			?Deafness, autosomal recessive 102, 615974 (3)
LCE3C	0.0439174
ZNF217	0.0439172
SLF2	0.0439172
MTRNR2L9	0.043917
LBH	0.043917
SERP2	0.0439169
ADAMTS5	0.0439169
UQCRH	0.0439166
METTL17	0.0439165
B3GAT2	0.0439165
RPS21	0.0439162
WDR38	0.0439161
NCR2	0.043916
APIP	0.0439159
RAMP3	0.0439158
MTR	0.0439157			Homocystinuria-megaloblastic anemia, cblG complementation type, 250940 (3), {Neural tube defects, folate-sensitive, susceptibility to}, 601634 (3)
ARMT1	0.0439156
COPZ2	0.0439155
OR12D3	0.0439153
KRTAP1-1	0.0439152
INS-IGF2	0.0439152
CAPNS2	0.0439152
OR1F1	0.0439151
HHLA3	0.0439147
ZNRD2	0.0439145
ODC1	0.0439144			{Colonic adenoma recurrence, reduced risk of}, 114500 (3)
SH3BGR	0.0439144
ACAD8	0.0439144			Isobutyryl-CoA dehydrogenase deficiency, 611283 (3)
G6PC2	0.0439143
TUBA3E	0.0439141
PDS5B	0.0439141
DMTF1	0.0439137
COX7B2	0.0439137
URB2	0.0439136
RPL17-C18orf32	0.0439135
GTF3C2	0.0439135
RPP30	0.0439133
MFHAS1	0.0439132			Malignant fibrous histiocytoma (2)
IL17RD	0.0439132			Hypogonadotropic hypogonadism 18 with or without anosmia, 615267 (3)
PCDHB11	0.0439131
RGS17	0.043913
PRKD3	0.043913
VAMP7	0.043913
GUCY2F	0.0439127
[truncated: 16,989 more rows]

## Sheet: Missense_Trivial
gene	probability	score	syndromic	OMIM
SCN2A	0.322571	1	0	Epileptic encephalopathy, early infantile, 11, 613721 (3), Seizures, benign familial infantile, 3, 607745 (3)
CSNK2A1	0.271216	1	0	Okur-Chung neurodevelopmental syndrome, 617062 (3)
TRRAP	0.18865	3	1
PPP2R5D	0.184242	1	0	Mental retardation, autosomal dominant 35, 616355 (3)
KCNQ2	0.175926	2	0	Epileptic encephalopathy, early infantile, 7, 613720 (3), Myokymia, 121200 (3), Seizures, benign neonatal, 1, 121200 (3)
DYNC1H1	0.167823	1	0	Charcot-Marie-Tooth disease, axonal, type 20, 614228 (3), Mental retardation, autosomal dominant 13, 614563 (3), Spinal muscular atrophy, lower extremity-predominant 1, AD, 158600 (3)
DDX3X	0.164595	1	0	Mental retardation, X-linked 102, 300958 (3)
OBSCN	0.163971
SMARCA2	0.157354	1	1	Nicolaides-Baraitser syndrome, 601358 (3)
TRIO	0.156002	1	0	Mental retardation, autosomal dominant 44, 617061 (3)
CDK13	0.155418		1	Congenital heart defects, dysmorphic facial features, and intellectual developmental disorder, 617360 (3)
PLEC	0.139165			?Epidermolysis bullosa simplex with nail dystrophy, 616487 (3), Epidermolysis bullosa simplex with muscular dystrophy, 226670 (3), Epidermolysis bullosa simplex with pyloric atresia, 612138 (3), Epidermolysis bullosa simplex, Ogna type, 131950 (3), Muscular dystrophy, limb-girdle, type 2Q, 613723 (3)
ITPR1	0.137341	3	0	Gillespie syndrome, 206700 (3), Spinocerebellar ataxia 15, 606658 (3), Spinocerebellar ataxia 29, congenital nonprogressive, 117360 (3)
RYR2	0.132475			Arrhythmogenic right ventricular dysplasia 2, 600996 (3), Ventricular tachycardia, catecholaminergic polymorphic, 1, 604772 (3)
SLC6A1	0.125797	1	0	Myoclonic-atonic epilepsy, 616421 (3)
SMARCA4	0.117228	1	0	Coffin-Siris syndrome 4, 614609 (3), {Rhabdoid tumor predisposition syndrome 2}, 613325 (3)
GRIN2B	0.110901	1	0	Epileptic encephalopathy, early infantile, 27, 616139 (3), Mental retardation, autosomal dominant 6, 613970 (3)
STXBP1	0.109009	1	0	Epileptic encephalopathy, early infantile, 4, 612164 (3)
UNC80	0.107474	3	0	Hypotonia, infantile, with psychomotor retardation and characteristic facies 2, 616801 (3)
NALCN	0.102337			Congenital contractures of the limbs and face, hypotonia, and developmental delay, 616266 (3), Hypotonia, infantile, with psychomotor retardation and characteristic facies 1, 615419 (3)
FOXP1	0.101794	1	0	Mental retardation with language impairment and with or without autistic features, 613670 (3)
WDFY3	0.0980226	1	0	?Microcephaly 18, primary, autosomal dominant, 617520 (3)
LAMA5	0.0966064
CREBBP	0.0960992	1	0	Rubinstein-Taybi syndrome 1, 180849 (3)
DNAH10	0.0948377	3	0
MYO1E	0.0945054	3	0	Glomerulosclerosis, focal segmental, 6, 614131 (3)
HECW2	0.0920927	2	0	Neurodevelopmental disorder with hypotonia, seizures, and absent language, 617268 (3)
APC2	0.0901583			?Sotos syndrome 3, 617169 (3)
GNAS	0.0897637	3	0	ACTH-independent macronodular adrenal hyperplasia, 219080 (3), McCune-Albright syndrome, somatic, mosaic 174800 (3), Osseous heteroplasia, progressive, 166350 (3), Pituitary adenoma 3, multiple types, somatic, 617686 (3), Pseudohypoparathyroidism Ia, 103580 (3), Pseudohypoparathyroidism Ib, 603233 (3), Pseudohypoparathyroidism Ic, 612462 (3), Pseudopseudohypoparathyroidism, 612463 (3)
CACNA1A	0.0893612	1	1	Epileptic encephalopathy, early infantile, 42, 617106 (3), Episodic ataxia, type 2, 108500 (3), Migraine, familial hemiplegic, 1, 141500 (3), Migraine, familial hemiplegic, 1, with progressive cerebellar ataxia, 141500 (3), Spinocerebellar ataxia 6, 183086 (3)
PKHD1	0.0867283			Polycystic kidney disease 4, with or without hepatic disease, 263200 (3)
PTEN	0.0849512	1	0	Bannayan-Riley-Ruvalcaba syndrome, 153480 (3), Cowden syndrome 1, 158350 (3), Endometrial carcinoma, somatic, 608089 (3), Lhermitte-Duclos syndrome, 158350 (3), Macrocephaly/autism syndrome, 605309 (3), Malignant melanoma, somatic, 155600 (3), PTEN hamartoma tumor syndrome (3), Squamous cell carcinoma, head and neck, somatic, 275355 (3), VATER association with macrocephaly and ventriculomegaly, 2…
DNAH1	0.0807002			?Ciliary dyskinesia, primary, 37, 617577 (3), Spermatogenic failure 18, 617576 (3)
TBL1XR1	0.0796343	1	0	Mental retardation, autosomal dominant 41 , 616944 (3), Pierpont syndrome, 602342 (3)
ZSWIM8	0.0781557
TET2	0.0777228	2	0	Myelodysplastic syndrome, somatic, 614286 (3)
DNMT3A	0.0772429	1	0	Acute myeloid leukemia, somatic, 601626 (3), Tatton-Brown-Rahman syndrome, 615879 (3)
ADGRV1	0.0761363			?Febrile seizures, familial, 4, 604352 (3), Usher syndrome, type 2C, 605472 (3), Usher syndrome, type 2C, GPR98/PDZD7 digenic, 605472 (3)
NOTCH1	0.0761177			Adams-Oliver syndrome 5, 616028 (3), Aortic valve disease 1, 109730 (3)
FAT1	0.0758083	3	0
PIK3CA	0.074318			Breast cancer, somatic, 114480 (3), CLOVE syndrome, somatic, 612918 (3), Colorectal cancer, somatic, 114500 (3), Cowden syndrome 5, 615108 (3), Gastric cancer, somatic, 613659 (3), Hepatocellular carcinoma, somatic, 114550 (3), Keratosis, seborrheic, somatic, 182000 (3), Megalencephaly-capillary malformation-polymicrogyria syndrome, somatic, 602501 (3), Nevus, epidermal, somatic, 162900 (3), Nons…
GOLGA3	0.07338
FBN3	0.0726638
CTCF	0.0719351	1	0	Mental retardation, autosomal dominant 21, 615502 (3)
DENND4A	0.0700419
PTPN23	0.06897
CACNA1H	0.0660965	2	0	Hyperaldosteronism, familial, type IV, 617027 (3), {Epilepsy, childhood absence, susceptibility to, 6}, 611942 (3), {Epilepsy, idiopathic generalized, susceptibility to, 6}, 611942 (3)
FBN2	0.0656176			Contractural arachnodactyly, congenital, 121050 (3), Macular degeneration, early-onset, 616118 (3)
CSMD1	0.0645307	3	0
RYR1	0.0645064			Central core disease, 117000 (3), King-Denborough syndrome, 145600 (3), Minicore myopathy with external ophthalmoplegia, 255320 (3), Neuromuscular disease, congenital, with uniform type 1 fiber, 117000 (3), {Malignant hyperthermia susceptibility 1}, 145600 (3)
KCNQ3	0.0638855	1	0	Seizures, benign neonatal, 2, 121201 (3)
NEB	0.0637469			Nemaline myopathy 2, autosomal recessive, 256030 (3)
KIF26A	0.062184
PTPRT	0.0618792	3	0
DLC1	0.0612889			Colorectal cancer, somatic, 114500 (3), Esophageal cancer, 133239 (1), Lung cancer, 211980 (1)
NOTCH3	0.0589967			?Myofibromatosis, infantile 2, 615293 (3), Cerebral arteriopathy with subcortical infarcts and leukoencephalopathy 1, 125310 (3), Lateral meningocele syndrome, 130720 (3)
ZFHX3	0.0588013			{Prostate cancer, susceptibility to, somatic}, 176807 (3)
SYNE1	0.058673	3	1	Emery-Dreifuss muscular dystrophy 4, autosomal dominant, 612998 (3), Spinocerebellar ataxia, autosomal recessive 8, 610743 (3)
CIT	0.0576588			Microcephaly 17, primary, autosomal recessive, 617090 (3)
MAGEC1	0.0569138
NOTCH2	0.0568121			Alagille syndrome 2, 610205 (3), Hajdu-Cheney syndrome, 102500 (3)
EEF1A2	0.0562016		1	Epileptic encephalopathy, early infantile, 33, 616409 (3), Mental retardation, autosomal dominant 38, 616393 (3)
CASK	0.0560552	1	0	FG syndrome 4, 300422 (3), Mental retardation and microcephaly with pontine and cerebellar hypoplasia, 300749 (3), Mental retardation, with or without nystagmus, 300422 (3)
BOD1L1	0.0560311
ACACB	0.055988
CLASP1	0.0559228	2	0
CHD2	0.0556806	1	0	Epileptic encephalopathy, childhood-onset, 615369 (3)
PTPN11	0.0556684	1	0	LEOPARD syndrome 1, 151100 (3), Leukemia, juvenile myelomonocytic, somatic, 607785 (3), Metachondromatosis, 156250 (3), Noonan syndrome 1, 163950 (3)
MROH5	0.0550962
TCF4	0.0546297	1	0	Corneal dystrophy, Fuchs endothelial, 3, 613267 (3), Pitt-Hopkins syndrome, 610954 (3), {Diabetes mellitus, type 2, susceptibility to}, 125853 (3)
PLXNA1	0.0546036
PCDH10	0.0542945	3	0
LAMC3	0.0541416			Cortical malformations, occipital, 614115 (3)
PRKD1	0.0539021		1	Congenital heart defects and ectodermal dysplasia, 617364 (3)
CBL	0.0537139			?Juvenile myelomonocytic leukemia, 607785 (3), Noonan syndrome-like disorder with or without juvenile myelomonocytic leukemia, 613563 (3)
PHRF1	0.0536792	2	0
DIDO1	0.052502
CYFIP2	0.0520921			Epileptic encephalopathy, early infantile, 65, 618008 (3)
SMAD4	0.0520296	2	0	Juvenile polyposis/hereditary hemorrhagic telangiectasia syndrome, 175050 (3), Myhre syndrome, 139210 (3), Pancreatic cancer, somatic, 260350 (3), Polyposis, juvenile intestinal, 174900 (3)
PHIP	0.0518604	1	0	Developmental delay, intellectual disability, obesity, and dysmorphic features, 617991 (3)
MAP2K1	0.0516051			Cardiofaciocutaneous syndrome 3, 615279 (3)
KIF13B	0.0515169	3	0
INSM2	0.0509667
SZT2	0.0509299			Epileptic encephalopathy, early infantile, 18, 615476 (3)
LRP1B	0.0509164
SUSD4	0.0507164
DPYSL5	0.0506209
GAS2L2	0.0500603
LAMB1	0.0498511	2	0	Lissencephaly 5, 615191 (3)
PACS1	0.0494553	1	0	Schuurs-Hoeijmakers syndrome, 615009 (3)
SYT1	0.0491122		1
POLQ	0.0485037
GNAI1	0.048409	1	0
CEP350	0.0481542
SLC6A13	0.047613
FBXO11	0.0475471	3	1
RRP8	0.0474942
PIKFYVE	0.0471139			Corneal fleck dystrophy, 121850 (3)
PLCG2	0.0466213			Autoinflammation, antibody deficiency, and immune dysregulation syndrome, 614878 (3), Familial cold autoinflammatory syndrome 3, 614468 (3)
COL7A1	0.04657			EBD inversa, 226600 (3), EBD, Bart type, 132000 (3), EBD, localisata variant (3), Epidermolysis bullosa dystrophica, AD, 131750 (3), Epidermolysis bullosa dystrophica, AR, 226600 (3), Epidermolysis bullosa pruriginosa, 604129 (3), Epidermolysis bullosa, pretibial, 131850 (3), Toenail dystrophy, isolated, 607523 (3), Transient bullous of the newborn, 131705 (3)
SPEG	0.0464434			Centronuclear myopathy 5, 615959 (3)
CERT1	0.0462338
C2CD3	0.0461515			?Orofaciodigital syndrome XIV, 615948 (3)
SCN8A	0.0460461	1	0	?Cognitive impairment with or without cerebellar ataxia, 614306 (3), Epileptic encephalopathy, early infantile, 13, 614558 (3), Seizures, benign familial infantile, 5, 617080 (3)
HDAC8	0.0459338		1	Cornelia de Lange syndrome 5, 300882 (3)
SEC16A	0.0455018
UBR5	0.0453775	2	0
POLE	0.0452248
TAF6	0.0450325	2	0	Alazami-Yuan syndrome, 617126 (3)
CHD7	0.0448441	1	0	CHARGE syndrome, 214800 (3), Hypogonadotropic hypogonadism 5 with or without anosmia, 612370 (3)
USH2A	0.0448088	3	0	Retinitis pigmentosa 39, 613809 (3), Usher syndrome, type 2A, 276901 (3)
GABRB2	0.0444691	1	0	Epileptic encephalopathy, infantile or early childhood, 2, 617829 (3)
EP400	0.0442098	2	0
SLC34A1	0.0439613			?Fanconi renotubular syndrome 2, 613388 (3), Hypercalcemia, infantile, 2, 616963 (3), Nephrolithiasis/osteoporosis, hypophosphatemic, 1, 612286 (3)
BAZ1B	0.0437962
MYO5C	0.0437784	3	0
GABRB3	0.0432849	1	0	Epileptic encephalopathy, early infantile, 43, 617113 (3), {Epilepsy, childhood absence, susceptibility to, 5}, 612269 (3)
ANK3	0.0431326	1	0	?Mental retardation, autosomal recessive, 37, 615493 (3)
DNAH11	0.04302			Ciliary dyskinesia, primary, 7, with or without situs inversus, 611884 (3)
DOCK1	0.0429367	3	0
ANKRD20A1	0.0429068
BTF3	0.0426643
LRP1	0.0425827	2	0	?Keratosis pilaris atrophicans, 604093 (3)
FOXG1	0.0424339	1	0	Rett syndrome, congenital variant, 613454 (3)
ANKHD1-EIF4EBP3	0.0424008
ANKHD1	0.0422166
GPRIN2	0.0421938
TRAPPC9	0.0420579	2	0	Mental retardation, autosomal recessive 13, 613192 (3)
MPDZ	0.0419904			Hydrocephalus, nonsyndromic, autosomal recessive 2, 615219 (3)
PRRC2C	0.0419875
EIF4G2	0.0413735
PRKDC	0.0409831	3	0	Immunodeficiency 26, with or without neurologic abnormalities, 615966 (3)
EBF3	0.0405732	1	0	Hypotonia, ataxia, and delayed development syndrome, 617330 (3)
KMT2C	0.0404849	1	0	Kleefstra syndrome 2, 617768 (3)
RUSC1	0.0400691
ABCC5	0.0399615
ABI3BP	0.039419
ABCA2	0.0394051
ACTC1	0.0392353			Atrial septal defect 5, 612794 (3), Cardiomyopathy, dilated, 1R, 613424 (3), Cardiomyopathy, hypertrophic, 11, 612098 (3), Left ventricular noncompaction 4, 613424 (3)
KMT2A	0.0392218	1	0	Leukemia, myeloid/lymphoid or mixed-lineage (2), Wiedemann-Steiner syndrome, 605130 (3)
AFF3	0.0387795
METTL16	0.0387411
WDR4	0.0385942
UMODL1	0.0384426
STXBP5L	0.0380763
MEF2C	0.0379845	1	0	Chromosome 5q14.3 deletion syndrome, 613443 (4), Mental retardation, stereotypic movements, epilepsy, and/or cerebral malformations, 613443 (3)
RBM27	0.0378772	2	0
TMEM94	0.0377755
KCNB1	0.0377445	1	0	Epileptic encephalopathy, early infantile, 26, 616056 (3)
CEP131	0.0375896
FMOD	0.0373676
NUP188	0.0369312
SLC9C1	0.036913
ABLIM1	0.0366018
PLAC8L1	0.0365825
NDRG3	0.0364915
MYH11	0.0364673			Aortic aneurysm, familial thoracic 4, 132900 (3)
PTGFRN	0.0363859
U2AF2	0.0361844
KCNMA1	0.0361758	3	0	?Cerebellar atrophy, developmental delay, and seizures, 617643 (3), Paroxysmal nonkinesigenic dyskinesia, 3, with or without generalized epilepsy, 609446 (3)
SCAF11	0.0361459
WNK1	0.0361068			Neuropathy, hereditary sensory and autonomic, type II, 201300 (3), Pseudohypoaldosteronism, type IIC, 614492 (3)
RECQL4	0.0357721			Baller-Gerold syndrome, 218600 (3), RAPADILINO syndrome, 266280 (3), Rothmund-Thomson syndrome, 268400 (3)
PRUNE2	0.0355811	3	0
HMGXB3	0.0355511
PRKCA	0.035291	3	0	Pituitary tumor, invasive (3)
FLNC	0.0350509			Cardiomyopathy, familial hypertrophic, 26 (3), Cardiomyopathy, familial restrictive 5, 617047 (3), Myopathy, distal, 4, 614065 (3), Myopathy, myofibrillar, 5, 609524 (3)
ZNF804B	0.0350474
KMT2B	0.0349039			Dystonia 28, childhood-onset, 617284 (3)
HECTD4	0.0348448	1	0
RAB11A	0.0347852
MTOR	0.0346766	2	1	Focal cortical dysplasia, type II, somatic, 607341 (3), Smith-Kingsmore syndrome, 616638 (3)
FAT3	0.0346712
CDYL2	0.0344966
ATP1A3	0.0342869	3	1	Alternating hemiplegia of childhood 2, 614820 (3), CAPOS syndrome, 601338 (3), Dystonia-12, 128235 (3)
MYO15A	0.0341878			Deafness, autosomal recessive 3, 600316 (3)
PPL	0.0341793
MYH14	0.0341074			?Peripheral neuropathy, myopathy, hoarseness, and hearing loss, 614369 (3), Deafness, autosomal dominant 4A, 600652 (3)
SOX4	0.034045
RPTOR	0.0340035
EP300	0.0338828	1	0	Colorectal cancer, somatic, 114500 (3), Rubinstein-Taybi syndrome 2, 613684 (3)
KMT5B	0.0338413	1	0	Mental retardation, autosomal dominant 51, 617788 (3)
MFRP	0.0338394	2	0	Microphthalmia, isolated 5, 611040 (3), Nanophthalmos 2, 609549 (3)
ATP11C	0.033709
RUFY1	0.0336591
ITGB4	0.0336456			Epidermolysis bullosa of hands and feet, 131800 (3), Epidermolysis bullosa, junctional, non-Herlitz type, 226650 (3), Epidermolysis bullosa, junctional, with pyloric atresia, 226730 (3)
BRD3	0.0336348
TNK2	0.033585
SMC3	0.0334618	3	1	Cornelia de Lange syndrome 3, 610759 (3)
SLC30A3	0.0333407
SMARCD1	0.0333193
ITGA7	0.0332921			Muscular dystrophy, congenital, due to ITGA7 deficiency, 613204 (3)
CLDN5	0.033272
IGDCC4	0.0332475
BFSP1	0.0331974			Cataract 33, multiple types, 611391 (3)
ZNF462	0.033107	1	0
LAMC1	0.0329781
PYHIN1	0.0329104	2	0
KDM3A	0.0327987
IQGAP2	0.0327247
KAT6B	0.0326685	3	0	Genitopatellar syndrome, 606170 (3), SBBYSS syndrome, 603736 (3)
SHB	0.0326615
SPTB	0.0326487			Anemia, neonatal hemolytic, fatal or near-fatal, 617948 (3), Elliptocytosis-3, 617948 (3), Spherocytosis, type 2, 616649 (3)
TFAP4	0.032644
PTK7	0.0322412	1	0
TFEB	0.0321775
ITGA2B	0.0321095			Bleeding disorder, platelet-type, 16, autosomal dominant, 187800 (3), Glanzmann thrombasthenia, 273800 (3), Thrombocytopenia, neonatal alloimmune, BAK antigen related (3)
PACS2	0.0319724		1
SPEN	0.0317891	2	0	Megakaryoblastic leukemia, acute (2)
BAG3	0.031555			Cardiomyopathy, dilated, 1HH, 613881 (3), Myopathy, myofibrillar, 6, 612954 (3)
CAMK2A	0.0314786	3	1	Mental retardation, autosomal dominant 53, 617798 (3)
ABCA1	0.0314713			HDL deficiency, type 2, 604091 (3), Tangier disease, 205400 (3), {Coronary artery disease in familial hypercholesterolemia, protection against}, 143890 (3)
DST	0.0314125	3	0	?Neuropathy, hereditary sensory and autonomic, type VI, 614653 (3), Epidermolysis bullosa simplex, autosomal recessive 2, 615425 (3)
VPS13D	0.0312668
KIAA0586	0.0312349			Joubert syndrome 23, 616490 (3), Short-rib thoracic dysplasia 14 with polydactyly, 616546 (3)
ABCA13	0.031119	3	0
ANO3	0.0309814			Dystonia 24, 615034 (3)
KALRN	0.0309			{Coronary heart disease, susceptibility to, 5}, 608901 (3)
ARHGEF28	0.0308372
BNC1	0.0307786
ELOA	0.0307769
SYNGAP1	0.030723	1	0	Mental retardation, autosomal dominant 5, 612621 (3)
SPATA31A6	0.0306523
PAOX	0.0304968
ASAP2	0.0304353	2	0
NLRC5	0.0304253
KIF19	0.0303956
TULP4	0.0303332
MPL	0.0303052			Myelofibrosis with myeloid metaplasia, somatic, 254450 (3), Thrombocythemia 2, 601977 (3), Thrombocytopenia, congenital amegakaryocytic, 604498 (3)
FAT2	0.0302855			Spinocerebellar ataxia 45, 617769 (3)
MLH1	0.0301898			Colorectal cancer, hereditary nonpolyposis, type 2, 609310 (3), Mismatch repair cancer syndrome, 276300 (3), Muir-Torre syndrome, 158320 (3)
DIS3L2	0.0301831			Perlman syndrome, 267000 (3)
RAD18	0.0300668
CSAD	0.0300363
AGO1	0.0299158	2	0
CGNL1	0.0299116	2	0
GRM7	0.0298429	3	0
GON4L	0.0298214
SIRPB1	0.0297541
UBE3C	0.0295895	2	0
DOCK7	0.0294337			Epileptic encephalopathy, early infantile, 23, 615859 (3)
CD22	0.0294324
ZNF142	0.0292717
STK36	0.029241
ATP2A1	0.0291773			Brody myopathy, 601003 (3)
PLA2G4B	0.0291309
KCNJ6	0.0290862			Keppen-Lubinsky syndrome, 614098 (3)
SLC39A12	0.0290315
MUC17	0.0290115
BRAF	0.0289167	1	0	Adenocarcinoma of lung, somatic, 211980 (3), Cardiofaciocutaneous syndrome, 115150 (3), Colorectal cancer, somatic (3), LEOPARD syndrome 3, 613707 (3), Melanoma, malignant, somatic (3), Nonsmall cell lung cancer, somatic (3), Noonan syndrome 7, 613706 (3)
ATP2B1	0.0288613
ARHGAP35	0.0287814
LRRC49	0.0287692
CRAMP1	0.0286399
LRRC4C	0.0286073	1	0
CUL7	0.0285264	2	0	3-M syndrome 1, 273750 (3)
JMJD7-PLA2G4B	0.0285227
ABR	0.0285212
RFX2	0.0285046
FANCM	0.0284964
OTOGL	0.0284218			Deafness, autosomal recessive 84B, 614944 (3)
CEP85	0.0283217
GALR3	0.0283012
SRBD1	0.0282026
PAK6	0.0281991
TLE4	0.028127
MED13	0.0281252	1	0
TTBK1	0.0280842
FN1	0.0280599			Glomerulopathy with fibronectin deposits 2, 601894 (3), Plasma fibronectin deficiency, 614101 (1), Spondylometaphyseal dysplasia, corner fracture type, 184255 (3)
MECOM	0.0279731			Radioulnar synostosis with amegakaryocytic thrombocytopenia 2, 616738 (3)
NCKAP5L	0.0279353
PRR12	0.0279347	1	0
NUDCD2	0.0279197	2	0
COL2A1	0.0278818			Achondrogenesis, type II or hypochondrogenesis, 200610 (3), Avascular necrosis of the femoral head, 608805 (3), Czech dysplasia, 609162 (3), Epiphyseal dysplasia, multiple, with myopia and deafness, 132450 (3), Kniest dysplasia, 156550 (3), Legg-Calve-Perthes disease, 150600 (3), Osteoarthritis with mild chondrodysplasia, 604864 (3), Platyspondylic skeletal dysplasia, Torrance type, 151210 (3), S…
ANKRD17	0.0278283
MEFV	0.027812			Familial Mediterranean fever, AD, 134610 (3), Familial Mediterranean fever, AR, 249100 (3)
IQUB	0.0278028
GTF3C1	0.0277731
STIL	0.0277368			Microcephaly 7, primary, autosomal recessive, 612703 (3)
RNF214	0.0275992
MDC1	0.0275709
BMP3	0.0275485
AP2M1	0.0274029
ZFP36	0.0273988
CCNB3	0.0273897
ARHGAP21	0.0273204
CRY2	0.0273188
YWHAG	0.0273152	3	1	Epileptic encephalopathy, early infantile, 56, 617665 (3)
SLC12A2	0.0273049
CNTD2	0.0272599
ZNF215	0.0271861
WASHC2C	0.0271462
GSE1	0.0271291
EPHA5	0.0271224
MYO7B	0.0271018
ADCY9	0.0270739
CSNK1E	0.0270226	3	0
ARID1B	0.0269985	1	0	Coffin-Siris syndrome 1, 135900 (3)
TSC2	0.026961	1	0	?Focal cortical dysplasia, type II, somatic, 607341 (3), Lymphangioleiomyomatosis, somatic, 606690 (3), Tuberous sclerosis-2, 613254 (3)
CD59	0.0269405			Hemolytic anemia, CD59-mediated, with or without immune-mediated polyneuropathy, 612300 (3)
AKAP1	0.0269238
KIF1A	0.0269218			Mental retardation, autosomal dominant 9, 614255 (3), Neuropathy, hereditary sensory, type IIC, 614213 (3), Spastic paraplegia 30, autosomal recessive, 610357 (3)
STRIP2	0.026843
ABL2	0.0268378			Leukemia, acute myeloid, with eosinophilia (1)
NLRX1	0.0268319
MECP2	0.0268025	1	0	Encephalopathy, neonatal severe, 300673 (3), Mental retardation, X-linked syndromic, Lubs type, 300260 (3), Mental retardation, X-linked, syndromic 13, 300055 (3), Rett syndrome, 312750 (3), Rett syndrome, atypical, 312750 (3), Rett syndrome, preserved speech variant, 312750 (3), {Autism susceptibility, X-linked 3}, 300496 (3)
PCDH1	0.02673
MTCL1	0.0266947
ZFP69	0.0266512
PUM2	0.0266355
CNTNAP4	0.0266216	2	0
DNAH9	0.0265584
TDRP	0.0265548
SLC22A23	0.0265545
KCNC1	0.026423	3	0	Epilepsy, progressive myoclonic 7, 616187 (3)
TNNI2	0.0264196			Arthrogryposis multiplex congenita, distal, type 2B, 601680 (3)
MTF2	0.0263288
PDZD8	0.0263094
SRCAP	0.0262773	1	0	Floating-Harbor syndrome, 136140 (3)
ZNF831	0.0262765
ZNF555	0.0262717
ZBTB20	0.0262645	1	0	Primrose syndrome, 259050 (3)
MANBA	0.0262207			Mannosidosis, beta, 248510 (3)
ASPHD2	0.0261601
VCX3A	0.026142
SOX11	0.0259938			Mental retardation, autosomal dominant 27, 615866 (3)
AKAP12	0.0259802
IQSEC2	0.0259539	1	0	Mental retardation, X-linked 1/78, 309530 (3)
EGLN2	0.0259356
CX3CL1	0.0258853
TCHH	0.0258832			?Uncombable hair syndrome 3, 617252 (3)
GPR108	0.025877
TCF3	0.0258631			Agammaglobulinemia 8, autosomal dominant, 616941 (3)
IL22RA1	0.0258251
ELP3	0.0257763
KCNK3	0.0257663			Pulmonary hypertension, primary, 4, 615344 (3)
CCDC57	0.0257634
KHK	0.0257443			[Fructosuria], 229800 (3)
CAND2	0.0255696
ZNF646	0.0255444
ABCA3	0.0254927			Surfactant metabolism dysfunction, pulmonary, 3, 610921 (3)
SARM1	0.025479
CELSR1	0.0254738
UBE2S	0.0253973
DDAH1	0.0253805
MYO9B	0.0251242	2	0	{Celiac disease, susceptibility to, 4}, 609753 (3)
CCAR1	0.0251132
ZNF880	0.0249801
SETD1A	0.0248467	1	0
HERC2	0.0248415		1	Mental retardation, autosomal recessive 38, 615516 (3), [Skin/hair/eye pigmentation 1, blond/brown hair], 227220 (3), [Skin/hair/eye pigmentation 1, blue/nonblue eyes], 227220 (3)
STAT5A	0.0248253
G3BP2	0.0248183
PLOD2	0.0247592			Bruck syndrome 2, 609220 (3)
SLC26A9	0.0246358
HERC1	0.0246229			Macrocephaly, dysmorphic facies, and psychomotor retardation, 617011 (3)
UNC45B	0.0245764			?Cataract 43, 616279 (3)
CACNA1G	0.0245583	3	0	Spinocerebellar ataxia 42, 616795 (3)
SMG6	0.0245533	3	0
MCF2L2	0.0245355
NBEAL2	0.0245005			Gray platelet syndrome, 139090 (3)
NRAP	0.0244523
ZNF497	0.0244144
C3	0.0243924			C3 deficiency, 613779 (3), {Hemolytic uremic syndrome, atypical, susceptibility to, 5}, 612925 (3), {Macular degeneration, age-related, 9}, 611378 (3)
MED23	0.0243659			Mental retardation, autosomal recessive 18, 614249 (3)
HMCN1	0.0243586			{Macular degeneration, age-related, 1}, 603075 (3)
DIS3	0.024327
GIGYF2	0.0243078	1	0	{Parkinson disease 11}, 607688 (3)
RTEL1	0.024239			Dyskeratosis congenita, autosomal dominant 4, 615190 (3), Dyskeratosis congenita, autosomal recessive 5, 615190 (3), Pulmonary fibrosis and/or bone marrow failure, telomere-related, 3, 616373 (3)
LARGE1	0.0242125
LTBP1	0.0242109
EFTUD2	0.0242029			Mandibulofacial dysostosis, Guion-Almeida type, 610536 (3)
IQGAP3	0.0241741	3	0
AGT	0.0241067			Renal tubular dysgenesis, 267430 (3), {Hypertension, essential, susceptibility to}, 145500 (3), {Preeclampsia, susceptibility to} (3)
SLX4	0.0240792			Fanconi anemia, complementation group P, 613951 (3)
OPALIN	0.0240754
ABI2	0.0240456
PTPRM	0.0240055
AGAP1	0.0239429	3	0
TAF1	0.023926		1	Dystonia-Parkinsonism, X-linked, 314250 (3), Mental retardation, X-linked, syndromic 33, 300966 (3)
WDR91	0.023916
ZMYM4	0.0238862
STK39	0.0237494	3	0
NIPBL	0.0237421	1	0	Cornelia de Lange syndrome 1, 122470 (3)
SSC5D	0.0237314
SECISBP2	0.023728			Thyroid hormone metabolism, abnormal, 609698 (3)
ACACA	0.0237256			Acetyl-CoA carboxylase deficiency, 613933 (1)
PURA	0.0236902			Mental retardation, autosomal dominant 31, 616158 (3)
MEGF11	0.0236713	3	0
BRCA2	0.0235494	3	0	Fanconi anemia, complementation group D1, 605724 (3), Wilms tumor, 194070 (3), {Breast cancer, male, susceptibility to}, 114480 (3), {Breast-ovarian cancer, familial, 2}, 612555 (3), {Glioblastoma 3}, 613029 (3), {Medulloblastoma}, 155255 (3), {Pancreatic cancer 2}, 613347 (3), {Prostate cancer}, 176807 (3)
SCN4A	0.0235316	3	0	Hyperkalemic periodic paralysis, type 2, 170500 (3), Hypokalemic periodic paralysis, type 2, 613345 (3), Myasthenic syndrome, congenital, 16, 614198 (3), Myotonia congenita, atypical, acetazolamide-responsive, 608390 (3), Paramyotonia congenita, 168300 (3)
GPC5	0.0235291
GOLGA5	0.0234849
PLEKHB2	0.0234136
DDX23	0.0234126
SCN7A	0.0233799
CACNA1B	0.0233747	3	0	?Dystonia 23, 614860 (3)
HIF3A	0.0233234
CFAP45	0.0232924
DCLK3	0.0232155
KLHL14	0.0231718
PDGFRB	0.0230259			Basal ganglia calcification, idiopathic, 4, 615007 (3), Kosaki overgrowth syndrome, 616592 (3), Myeloproliferative disorder with eosinophilia, 131440 (4), Myofibromatosis, infantile, 1, 228550 (3), Premature aging syndrome, Penttinen type, 601812 (3)
CHD9	0.0229575
IGSF5	0.0229535
BPTF	0.022941			Neurodevelopmental disorder with dysmorphic facies and distal limb anomalies, 617755 (3)
P4HA2	0.0229073	2	0	Myopia 25, autosomal dominant, 617238 (3)
UIMC1	0.0229034	3	0
NUMA1	0.0228512			Leukemia, acute promyelocytic, somatic, 612376 (3)
ALMS1	0.0228264			Alstrom syndrome, 203800 (3)
ACTN4	0.0228065	3	0	Glomerulosclerosis, focal segmental, 1, 603278 (3)
DCAF11	0.0226689
USP9X	0.0226163	1	1	Mental retardation, X-linked 99, 300919 (3), Mental retardation, X-linked 99, syndromic, female-restricted, 300968 (3)
LPIN2	0.0225578			Majeed syndrome, 609628 (3)
MAP3K11	0.0224578
B4GALNT4	0.0224373
PLEKHG6	0.0224115
ABCC9	0.022406			Atrial fibrillation, familial, 12, 614050 (3), Cardiomyopathy, dilated, 1O, 608569 (3), Hypertrichotic osteochondrodysplasia, 239850 (3)
CHD4	0.022384			Sifrim-Hitz-Weiss syndrome, 617159 (3)
DCAF1	0.0223181
ZNF208	0.0222998
DAPK1	0.0222914
PI4K2B	0.0222791
IRS2	0.0222719			{Diabetes mellitus, noninsulin-dependent}, 125853 (3)
GTF3C5	0.0222705
CCDC87	0.0222442
DISC1	0.0222135	2	0	{Schizophrenia 9, susceptibility to}, 604906 (3)
WDR62	0.0221699			Microcephaly 2, primary, autosomal recessive, with or without cortical malformations, 604317 (3)
LLGL1	0.0220729
GRIK5	0.0220453	2	0
ARHGAP39	0.0220013
MDN1	0.021988
DHRS2	0.0219698
SPTBN4	0.0219448			?Myopathy, congenital, with neuropathy and deafness, 617519 (3)
FAM135B	0.0219011
GRAMD1B	0.0218677
CARD10	0.0218612
PPP5C	0.0218524	1	0
KIRREL3	0.0218466	2	0
WNK4	0.0218123			Pseudohypoaldosteronism, type IIB, 614491 (3)
PDE4B	0.0217445
CRACR2B	0.0216851
ZBTB41	0.0216842
PEAR1	0.0216428
FAM120B	0.0216088
AFAP1L1	0.0215917
BCR	0.0215552			Leukemia, acute lymphocytic, somatic, 613065 (3), Leukemia, chronic myeloid, somatic, 608232 (3)
CDKL5	0.0215181	1	0	Epileptic encephalopathy, early infantile, 2, 300672 (3)
PPP2R1A	0.0214356			Mental retardation, autosomal dominant 36, 616362 (3)
PDK2	0.0214328	3	0
GOLGA4	0.021322
DNM1	0.0213201			Epileptic encephalopathy, early infantile, 31, 616346 (3)
NHSL1	0.0212671
LCMT2	0.0212457
ASPSCR1	0.0212309			Alveolar soft-part sarcoma, 606243 (3)
PATL1	0.021209
HSPA4	0.0212025
ZFPM2	0.0211841			46XY sex reversal 9, 616067 (3), Diaphragmatic hernia 3, 610187 (3), Tetralogy of Fallot, 187500 (3)
TRIP12	0.0211588	1	0	Mental retardation, autosomal dominant 49, 617752 (3)
ENDOU	0.0211481
LRRC37A3	0.0211257
CEP170B	0.0210997
TMEM131L	0.0210665
PLXNA2	0.0210658
ZFAT	0.0210626
FBXL6	0.0209641
GABBR2	0.0209634	3	1	Epileptic encephalopathy, early infantile, 59, 617904 (3), Neurodevelopmental disorder with poor language and loss of hand skills, 617903 (3), {Nicotine dependence, protection against}, 188890 (3), {Nicotine dependence, susceptibility to}, 188890 (3)
VWCE	0.0209163
SNX22	0.0208984
SLC5A6	0.0208926
WDR26	0.0208682		1	Skraban-Deardorff syndrome, 617616 (3)
DVL1	0.0208674			Robinow syndrome, autosomal dominant 2, 616331 (3)
ALG13	0.020855			?Congenital disorder of glycosylation, type Is, 300884 (3), Epileptic encephalopathy, early infantile, 36, 300884 (3)
RGL1	0.0207932
TBC1D20	0.0207875			Warburg micro syndrome 4, 615663 (3)
CHRND	0.0207803			?Myasthenic syndrome, congenital, 3A, slow-channel, 616321 (3), ?Myasthenic syndrome, congenital, 3C, associated with acetylcholine receptor deficiency, 616323 (3), Multiple pterygium syndrome, lethal type, 253290 (3), Myasthenic syndrome, congenital, 3B, fast-channel, 616322 (3)
BRD4	0.0207324	3	0
SATB2	0.020725	3	1	Glass syndrome, 612313 (3)
ATP10A	0.0207189	2	0
ZNF333	0.0207174
PXDNL	0.0207114
DEAF1	0.0207091	1	0	?Dyskinesia, seizures, and intellectual developmental disorder, 617171 (3), Mental retardation, autosomal dominant 24, 615828 (3)
CLCA2	0.0206991
SAMD9L	0.0206863			Ataxia-pancytopenia syndrome, 159550 (3)
TRAF7	0.0206639	1	0
LRRC31	0.0206432
ATP11A	0.0206355
ARAP1	0.0206284
FAIM2	0.0206138
SLC26A5	0.0205999			?Deafness, autosomal recessive 61, 613865 (3)
PRMT9	0.0205819
TBCD	0.0205635			Encephalopathy, progressive, early-onset, with brain atrophy and thin corpus callosum, 617193 (3)
CABP7	0.0204722
PITPNM3	0.0204716			Cone-rod dystrophy 5, 600977 (3)
THEMIS	0.0203472
CCDC88C	0.020344	3	0	?Spinocerebellar ataxia 40, 616053 (3), Hydrocephalus, nonsyndromic, autosomal recessive, 236600 (3)
KLHL25	0.0203364
BCL11A	0.0203316	1	0	Dias-Logan syndrome, 617101 (3)
ZNF233	0.0203157
ATP2B4	0.020248
CUX1	0.0202323	2	0
RIPK1	0.0202207
WWOX	0.0201718	2	0	Epileptic encephalopathy, early infantile, 28, 616211 (3), Esophageal squamous cell carcinoma, somatic, 133239 (3), Spinocerebellar ataxia, autosomal recessive 12, 614322 (3)
MUC2	0.0201709
ATG9B	0.0201418
CIDEC	0.0201023			?Lipodystrophy, familial partial, type 5, 615238 (3)
HSPA12A	0.0200903
CENPJ	0.0200742			?Seckel syndrome 4, 613676 (3), Microcephaly 6, primary, autosomal recessive, 608393 (3)
EYA1	0.0200554			?Otofaciocervical syndrome, 166780 (3), Anterior segment anomalies with or without cataract, 602588 (3), Branchiootic syndrome 1, 602588 (3), Branchiootorenal syndrome 1, with or without cataracts, 113650 (3)
TLN2	0.0200366
ZNF681	0.0200072
VIPAS39	0.0200024			Arthrogryposis, renal dysfunction, and cholestasis 2, 613404 (3)
RFX8	0.0199952
ADGRL2	0.0199948
SIAH1	0.0199501
IL21R	0.0199196			Immunodeficiency 56, 615207 (3), [IgE, elevated level of], 147050 (3)
TPO	0.0199161	3	0	Thrombocythemia 1, 187950 (3), Thyroid dyshormonogenesis 2A, 274500 (3)
PODN	0.0199139
ST14	0.0198675			Ichthyosis, congenital, autosomal recessive 11, 602400 (3)
SRGAP3	0.0198461	3	0
PROP1	0.0198403			Pituitary hormone deficiency, combined, 2, 262600 (3)
RAB11B	0.0198187			Neurodevelopmental disorder with ataxic gait, absent speech, and decreased cortical white matter, 617807 (3)
NDRG4	0.0197924
RTTN	0.0197825			Microcephaly, short stature, and polymicrogyria with seizures, 614833 (3)
SPSB1	0.0197709
POMGNT2	0.0197586			Muscular dystrophy-dystroglycanopathy (congenital with brain and eye anomalies, type A, 8, 614830 (3)
CLTC	0.0197479			Mental retardation, autosomal dominant 56, 617854 (3)
CYP27B1	0.0197472			Vitamin D-dependent rickets, type I, 264700 (3)
CTC1	0.0197165			Cerebroretinal microangiopathy with calcifications and cysts, 612199 (3)
EXTL1	0.0197065
CBLL1	0.0196967
PAX3	0.0196799			Craniofacial-deafness-hand syndrome, 122880 (3), Rhabdomyosarcoma 2, alveolar, 268220 (3), Waardenburg syndrome, type 1, 193500 (3), Waardenburg syndrome, type 3, 148820 (3)
GPR146	0.0196647
DHX37	0.019642
MED15	0.0196372
TJP1	0.0196322
ATG2A	0.0196276
WASHC5	0.0195957
AKNA	0.0195706
CACNA1S	0.0195115			Hypokalemic periodic paralysis, type 1, 170400 (3), {Malignant hyperthermia susceptibility 5}, 601887 (3), {Thyrotoxic periodic paralysis, susceptibility to, 1}, 188580 (3)
ZFC3H1	0.0195109
CEP192	0.0194719
ABCB9	0.0194349
TTC17	0.0193871
PAPOLG	0.0193804	3	0
MORC2	0.0193518			Charcot-Marie-Tooth disease, axonal, type 2Z, 616688 (3)
ITGA5	0.0193387
TTLL12	0.0193326
TRAPPC10	0.0192996
MAST3	0.019214
RNF43	0.0191699			Sessile serrated polyposis cancer syndrome, 617108 (3)
CRB2	0.0191654			Focal segmental glomerulosclerosis 9, 616220 (3), Ventriculomegaly with cystic kidney disease, 219730 (3)
FGFR4	0.0191619			{Cancer progression/metastasis} (3)
CNGA3	0.0190927			Achromatopsia 2, 216900 (3)
CEP164	0.0190844			Nephronophthisis 15, 614845 (3)
DPP6	0.01908	3	0	Mental retardation, autosomal dominant 33, 616311 (3), {Ventricular fibrillation, paroxysmal familial, 2}, 612956 (3)
ANK2	0.0190693	1	0	Cardiac arrhythmia, ankyrin-B-related, 600919 (3), Long QT syndrome 4, 600919 (3)
AP3D1	0.0190504			?Hermansky-Pudlak syndrome 10, 617050 (3)
ZNF777	0.0190394
NSL1	0.0190259
ABCG2	0.0190141			[Junior blood group system], 614490 (3), [Uric acid concentration, serum, QTL1], 138900 (3)
TRIM23	0.0190064	1	0
TWF1	0.0189976
THSD1	0.0189927
SIGIRR	0.0189189
JCAD	0.0189174
MPO	0.0189122			Myeloperoxidase deficiency, 254600 (3), {Alzheimer disease, susceptibility to}, 104300 (3), {Lung cancer, protection against, in smokers} (3)
ZMYND8	0.0189121	1	0
DDX60	0.0188851
SLC22A9	0.0188476	3	0
CHD8	0.0188436	1	0	{Autism, susceptibility to, 18}, 615032 (3)
A2ML1	0.0188205
TLE2	0.0188162
ELAVL3	0.0188045	1	0
TENT2	0.0188042
SNAPC5	0.0186861
CYP26B1	0.0186609			Craniosynostosis with radiohumeral fusions and other skeletal and craniofacial anomalies, 614416 (3)
FZD10	0.0186607
GSTA1	0.0186422
PPP6R1	0.0186394
FHOD3	0.0186276
CCDC168	0.0186113
CEP95	0.0185777
LTK	0.0185709
ZNF638	0.0185703
TCTN2	0.0185501			?Meckel syndrome 8, 613885 (3), Joubert syndrome 24, 616654 (3)
GNB2	0.0185182
COL27A1	0.0185025			?Steel syndrome, 615155 (3)
COL20A1	0.0184819
KIF2A	0.0184632			Cortical dysplasia, complex, with other brain malformations 3, 615411 (3)
EIF2AK3	0.0184534			Wolcott-Rallison syndrome, 226980 (3)
ZNF445	0.0184142
NPBWR2	0.0184133
PNKD	0.0184119
CLCN4	0.018406	3	1	Mental retardation, X-linked 49/15, 300114 (3)
NFE2L2	0.0183643			Immunodeficiency, developmental delay, and hypohomocysteinemia, 617744 (3)
SLCO1C1	0.0183643
SHISA6	0.0183546
S1PR4	0.0183443
EPAS1	0.018336			Erythrocytosis, familial, 4, 611783 (3)
STUB1	0.0183022			Spinocerebellar ataxia, autosomal recessive 16, 615768 (3)
CDK18	0.0182993
PHF3	0.0182515	1	0
MAGEA6	0.0182475
ADGRA3	0.018157
EIF2AK1	0.018147
APOB	0.0181451			Hypercholesterolemia, due to ligand-defective apo B, 144010 (3), Hypobetalipoproteinemia, 615558 (3)
CNOT1	0.0181041	2	0
POLD1	0.0180938			Mandibular hypoplasia, deafness, progeroid features, and lipodystrophy syndrome, 615381 (3), {Colorectal cancer, susceptibility to, 10}, 612591 (3)
TRPM7	0.0180693			{Amyotrophic lateral sclerosis-parkinsonism/dementia complex, susceptibility to}, 105500 (3)
STK32C	0.0180208
CD163L1	0.0180075
UPF1	0.0179813
RBM12	0.0179429			{Schizophrenia 19, susceptibility to}, 617629 (3)
DNAAF5	0.0179415			Ciliary dyskinesia, primary, 18, 614874 (3)
R3HDM4	0.0179398
OR5T2	0.0179303
FAM160B2	0.0179031
ARHGEF1	0.0178927
GGNBP2	0.0178668	2	0
ADAMTS17	0.017803			Weill-Marchesani 4 syndrome, recessive, 613195 (3)
SEL1L2	0.0177197
MMRN1	0.0176879
STC1	0.0176697
HSPA12B	0.0176636
CRTC3	0.0176564
TRPV4	0.017587			?Avascular necrosis of femoral head, primary, 2, 617383 (3), Brachyolmia type 3, 113500 (3), Digital arthropathy-brachydactyly, familial, 606835 (3), Hereditary motor and sensory neuropathy, type IIc, 606071 (3), Metatropic dysplasia, 156530 (3), Parastremmatic dwarfism, 168400 (3), SED, Maroteaux type, 184095 (3), Scapuloperoneal spinal muscular atrophy, 181405 (3), Spinal muscular atrophy, dist…
KCNJ4	0.0175597
RERE	0.01754	1	0	Neurodevelopmental disorder with or without anomalies of the brain, eye, or heart, 616975 (3)
PUS7	0.0175376
SLC12A6	0.0175273			Agenesis of the corpus callosum with peripheral neuropathy, 218000 (3)
NKTR	0.0175187
MTERF4	0.0175065
OR51I1	0.0174809
SOGA3	0.0174743
GPN1	0.0174687
ATP6V1A	0.0174628
USP50	0.017453
WDR45	0.0174234			Neurodegeneration with brain iron accumulation 5, 300894 (3)
FRAS1	0.0174045			Fraser syndrome 1, 219000 (3)
SGPP1	0.017367
CUX2	0.0173646	3	1
EZR	0.0173538
TPK1	0.0173501			Thiamine metabolism dysfunction syndrome 5 (episodic encephalopathy type), 614458 (3)
ZNF362	0.0173286
KRTAP9-3	0.0173234
TTLL5	0.0173219			Cone-rod dystrophy 19, 615860 (3)
SPG11	0.0173136			Amyotrophic lateral sclerosis 5, juvenile, 602099 (3), Charcot-Marie-Tooth disease, axonal, type 2X, 616668 (3), Spastic paraplegia 11, autosomal recessive, 604360 (3)
TIE1	0.0173037
LONP1	0.0172937			CODAS syndrome, 600373 (3)
HNRNPF	0.0172667
MANSC1	0.0172364
NR2F1	0.0172304	3	1	Bosch-Boonstra-Schaaf optic atrophy syndrome, 615722 (3)
ZSCAN29	0.0172296
FREM2	0.0172289			Fraser syndrome 2, 617666 (3)
TANC1	0.0172254
PLEKHA8	0.0171971
NOTCH4	0.0171955
SVEP1	0.0171624
MYH10	0.0171563	2	0
ITGAV	0.0171463
ITK	0.0171387			Lymphoproliferative syndrome 1, 613011 (3)
RNPEPL1	0.0171018
CCT4	0.0170858	2	0
NSUN6	0.0170796
SAMD9	0.0170684			MIRAGE syndrome, 617053 (3), Tumoral calcinosis, familial, normophosphatemic, 610455 (3)
CASC1	0.0170646
FSIP2	0.0170228
CUL9	0.0170172
ANK1	0.0169843			Spherocytosis, type 1, 182900 (3)
ABCF1	0.0169702
STXBP5	0.0169674	2	0
ITPR3	0.0169418			{Diabetes, type 1, susceptibility to}, 222100 (2)
MCOLN3	0.0169231
LMTK2	0.016914
STAT4	0.0169043			{Systemic lupus erythematosus, susceptibility to, 11}, 612253 (3)
GALNT9	0.0168981
PTPRS	0.0168974
NAGS	0.0168692			N-acetylglutamate synthase deficiency, 237310 (3)
CA9	0.0168614
CFAP46	0.016857
TNFRSF14	0.0168557
ATRX	0.0168492	1	0	Alpha-thalassemia myelodysplasia syndrome, somatic, 300448 (3), Alpha-thalassemia/mental retardation syndrome, 301040 (3), Mental retardation-hypotonic facies syndrome, X-linked, 309580 (3)
CPSF3	0.016834
DNAH5	0.0168316			Ciliary dyskinesia, primary, 3, with or without situs inversus, 608644 (3)
CPT1B	0.0168163
AGFG2	0.0168059
SPATA32	0.0168026
DNAH2	0.016787
SIN3B	0.0167776
TRPC6	0.0167646	2	0	Glomerulosclerosis, focal segmental, 2, 603965 (3)
KRT76	0.0167416
CYB561D1	0.0167222
NLGN2	0.0167212	1	0
RBM47	0.0167174
RGMA	0.0167107
TSNARE1	0.0166994
UBASH3B	0.0166806
MAP4	0.0166636
PTGES	0.0166377
XYLT1	0.0166363			Desbuquois dysplasia 2, 615777 (3), {Pseudoxanthoma elasticum, modifier of severity of}, 264800 (3)
EPHA10	0.0166284
ACAD10	0.0166054
GOLGA6L2	0.0166024
SKIL	0.0166006
MAST2	0.0165457
SLIT2	0.0165033
FRMPD4	0.0164946		1	Mental retardation, X-linked 104, 300983 (3)
DCDC1	0.0164821
LIG1	0.0164739
HTR2B	0.0164693
ZNF804A	0.0164615	2	0
DUSP6	0.0164016			Hypogonadotropic hypogonadism 19 with or without anosmia, 615269 (3)
RBM20	0.0163991			Cardiomyopathy, dilated, 1DD, 613172 (3)
ZBTB38	0.0163916
ADCY6	0.0163892			?Lethal congenital contracture syndrome 8, 616287 (3)
H2AC8	0.0163869
PHTF2	0.0163814
ASCC3	0.0163804
CDRT1	0.0163787
HCN4	0.0163633			Brugada syndrome 8, 613123 (3), Sick sinus syndrome 2, 163800 (3)
RBBP6	0.0163528
PDZRN4	0.0163517
FLT3	0.0163474			Leukemia, acute lymphoblastic, somatic, 613065 (3), Leukemia, acute myeloid, reduced survival in, somatic, 601626 (3), Leukemia, acute myeloid, somatic, 601626 (3)
ITGA9	0.0163453
COL28A1	0.0163213	3	0
ZNF219	0.016316
DAG1	0.0163155			Muscular dystrophy-dystroglycanopathy (congenital with brain and eye anomalies), type A, 9, 616538 (3), Muscular dystrophy-dystroglycanopathy (limb-girdle), type C, 9, 613818 (3)
TSPYL1	0.016276			Sudden infant death with dysgenesis of the testes syndrome, 608800 (3)
PLOD3	0.0162734			Lysyl hydroxylase 3 deficiency, 612394 (3)
EGFR	0.0162733			?Inflammatory skin and bowel disease, neonatal, 2, 616069 (3), Adenocarcinoma of lung, response to tyrosine kinase inhibitor in, 211980 (3), Nonsmall cell lung cancer, response to tyrosine kinase inhibitor in, 211980 (3), {Nonsmall cell lung cancer, susceptibility to}, 211980 (3)
DCAF4L2	0.0162434
SNAP25	0.016228	3	0	?Myasthenic syndrome, congenital, 18, 616330 (3)
LRRC4	0.0162264	3	0
PCNX1	0.016188
GRM6	0.016127			Night blindness, congenital stationary (complete), 1B, autosomal recessive, 257270 (3)
IQCE	0.0161179			?Polydactyly, postaxial, type A7, 617642 (3)
NFATC1	0.0161133
DNHD1	0.0161079
SLC12A9	0.0161028
MOCOS	0.0161002			Xanthinuria, type II, 603592 (3)
NKX2-1	0.0160987			Chorea, hereditary benign, 118700 (3), Choreoathetosis, hypothyroidism, and neonatal respiratory distress, 610978 (3), {Thyroid cancer, nonmedullary, 1}, 188550 (3)
EIF3J	0.016084
MTTP	0.0160757
EXT1	0.0160384	3	0	Chondrosarcoma, 215300 (3), Exostoses, multiple, type 1, 133700 (3)
PNPLA2	0.0160241			Neutral lipid storage disease with myopathy, 610717 (3)
SI	0.0160182			Sucrase-isomaltase deficiency, congenital, 222900 (3)
NOC2L	0.0160106
SF1	0.0159876			46, XX sex reversal 4, 617480 (3), 46XY sex reversal 3, 612965 (3), Adrenocortical insufficiency, 612964 (3), Premature ovarian failure 7, 612964 (3), Spermatogenic failure 8, 613957 (3)
MPP6	0.0159858	3	0
DNTT	0.0159683
PSMC5	0.0159661
ZDBF2	0.0159269
TUBGCP2	0.0159174
HDAC9	0.0158935
DYSF	0.0158879			Miyoshi muscular dystrophy 1, 254130 (3), Muscular dystrophy, limb-girdle, type 2B, 253601 (3), Myopathy, distal, with anterior tibial onset, 606768 (3)
CLIP2	0.0158575	3	0
DNAH3	0.0158574	3	0
MGAM	0.0158475
HDLBP	0.015847	1	0
ARHGEF18	0.0158445			Retinitis pigmentosa 78, 617433 (3)
TPR	0.0158219
PFKP	0.0158201
GNPDA2	0.015782
POLA2	0.0157806	3	0
CNGB1	0.0157696			Retinitis pigmentosa 45, 613767 (3)
SYNJ1	0.0157671	3	0	Epileptic encephalopathy, early infantile, 53, 617389 (3), Parkinson disease 20, early-onset, 615530 (3)
SUPT6H	0.0157651
TBRG1	0.0157374
CNPY2	0.0157228
LRPAP1	0.0157154			Myopia 23, autosomal recessive, 615431 (3)
RUNDC1	0.0156956
SEC23A	0.0156364			Craniolenticulosutural dysplasia, 607812 (3)
IRF8	0.0156226			Immunodeficiency 32A, mycobacteriosis, autosomal dominant, 614893 (3), Immunodeficiency 32B, monocyte and dendritic cell deficiency, autosomal recessive, 226990 (3)
CEP63	0.0155948			?Seckel syndrome 6, 614728 (3)
EXT2	0.0155908			?Seizures, scoliosis, and macrocephaly syndrome, 616682 (3), Exostoses, multiple, type 2, 133701 (3)
COLEC12	0.0155889
SPECC1L	0.0155835			?Facial clefting, oblique, 1, 600251 (3), Opitz GBBB syndrome, type II, 145410 (3)
LAMB3	0.0155761			Amelogenesis imperfecta, type IA, 104530 (3), Epidermolysis bullosa, junctional, Herlitz type, 226700 (3), Epidermolysis bullosa, junctional, non-Herlitz type, 226650 (3)
FICD	0.0155671
ATF7IP	0.0155643
IGSF9	0.0155585
PAN2	0.0155544
NOS3	0.0155513			{Alzheimer disease, late-onset, susceptibility to}, 104300 (3), {Coronary artery spasm 1, susceptibility to} (3), {Hypertension, pregnancy-induced}, 189800 (3), {Hypertension, susceptibility to}, 145500 (3), {Ischemic stroke, susceptibility to}, 601367 (3), {Placental abruption} (3)
BID	0.0155437
TP53BP1	0.0155355
CCN6	0.0155332
MEGF8	0.0155331			Carpenter syndrome 2, 614976 (3)
SMG8	0.015526
PRPF18	0.0155218
PRRC1	0.0155179
IMPDH2	0.0154929			[IMPDH2 enzyme activity, variation in], 617995 (3)
NCOA2	0.0154889
NPTN	0.0154887
SDC3	0.0154835			{Obesity, association with}, 601665 (3)
ENPP2	0.0154783
PLEKHG1	0.0154776
EZH2	0.015451			Weaver syndrome, 277590 (3)
PBX1	0.0154237	3	0	Congenital anomalies of kidney and urinary tract syndrome with or without hearing loss, abnormal ears, or developmental delay, 617641 (3)
RUNDC3A	0.0154067
DNAH17	0.0153934	3	0
OR6Q1	0.0153932
EPHB4	0.0153916			{Hydrops fetalis, nonimmune, and/or atrial septal defect}, 617300 (3)
MYH3	0.0153827			Arthrogryposis, distal, type 2A, 193700 (3), Arthrogryposis, distal, type 2B, 601680 (3), Arthrogryposis, distal, type 8, 178110 (3)
PSME4	0.0153821
GNAO1	0.0153783			Epileptic encephalopathy, early infantile, 17, 615473 (3), Neurodevelopmental disorder with involuntary movements, 617493 (3)
TCAF2	0.015365
DUOX2	0.0153592			Thyroid dyshormonogenesis 6, 607200 (3)
POLG	0.0153555			Mitochondrial DNA depletion syndrome 4A (Alpers type), 203700 (3), Mitochondrial DNA depletion syndrome 4B (MNGIE type), 613662 (3), Mitochondrial recessive ataxia syndrome (includes SANDO and SCAE), 607459 (3), Progressive external ophthalmoplegia, autosomal dominant 1, 157640 (3), Progressive external ophthalmoplegia, autosomal recessive 1, 258450 (3)
ANKRD35	0.0153471
NRP1	0.015328
SV2A	0.0153126
AGO4	0.0153025	2	0
SIRT1	0.0152977
PCOLCE2	0.0152939
CACNA1C	0.01529	1	0	Brugada syndrome 3, 611875 (3), Timothy syndrome, 601005 (3)
MATN2	0.0152769
PKP3	0.0152733
GRIN2C	0.015269
CIC	0.0152597	1	0	Mental retardation, autosomal dominant 45, 617600 (3)
CLASP2	0.015247
TFE3	0.0152464			Renal cell carcinoma, papillary, 1, 300854 (3)
CDH24	0.0152321
EPHA4	0.0152267
ZAP70	0.0152179			Autoimmune disease, multisystem, infantile-onset, 2, 617006 (3), Immunodeficiency 48, 269840 (3)
RNF215	0.0151772
PPOX	0.0151745			Porphyria variegata, 176200 (3)
H4C3	0.015171
IDO2	0.0151694
LTA4H	0.0151685
DNAJC13	0.0151607
ARFGAP2	0.0151591
THSD7B	0.0151439
ALPK3	0.0151153
SPRR1A	0.0151149
NAA60	0.0151076
WDR35	0.0150942			Cranioectodermal dysplasia 2, 613610 (3), Short-rib thoracic dysplasia 7 with or without polydactyly, 614091 (3)
FAM160A1	0.0150886
FBN1	0.0150671	2	0	Acromicric dysplasia, 102370 (3), Ectopia lentis, familial, 129600 (3), Geleophysic dysplasia 2, 614185 (3), MASS syndrome, 604308 (3), Marfan lipodystrophy syndrome, 616914 (3), Marfan syndrome, 154700 (3), Stiff skin syndrome, 184900 (3), Weill-Marchesani syndrome 2, dominant, 608328 (3)
ADGRG5	0.0150543
CCDC91	0.0150428	3	0
NUP133	0.0150306	3	0
GRID2	0.0150115	3	0	Spinocerebellar ataxia, autosomal recessive 18, 616204 (3)
PTGR1	0.0150062
MMP3	0.0150027			{Coronary heart disease, susceptibility to, 6}, 614466 (3)
SGSM3	0.0149723	3	0
KIAA1328	0.0149572
DCLK1	0.0149466
LYRM9	0.0149392
SOS1	0.0149362			?Fibromatosis, gingival, 1, 135300 (3), Noonan syndrome 4, 610733 (3)
ADCY5	0.01492	3	0	Dyskinesia, familial, with facial myokymia, 606703 (3)
L3MBTL4	0.0149118
HOXA1	0.0149027		1	Athabaskan brainstem dysgenesis syndrome, 601536 (3), Bosley-Salih-Alorainy syndrome, 601536 (3)
SFMBT2	0.0148977
NUTM2A	0.0148888
ASL	0.0148446			Argininosuccinic aciduria, 207900 (3)
LRFN2	0.014836	3	0
TTC39A	0.0148088
PIEZO2	0.0148069			?Marden-Walker syndrome, 248700 (3), Arthrogryposis, distal, type 3, 114300 (3), Arthrogryposis, distal, type 5, 108145 (3), Arthrogryposis, distal, with impaired proprioception and touch, 617146 (3)
MIDN	0.0147851
LYPD2	0.0147736
COL5A2	0.0147714			Ehlers-Danlos syndrome, classic type, 2, 130010 (3)
NLRP6	0.0147489
NR4A2	0.0147443	1	0
ATAD5	0.0147377
TTLL7	0.0147342
ADGRA2	0.0147282
SRPK3	0.0147224
NRF1	0.014717
MUC3A	0.0147155
PUF60	0.0147142			Verheij syndrome, 615583 (3)
CDH18	0.0147027
LSAMP	0.0146948
SPON2	0.0146934
HK1	0.0146899			Hemolytic anemia due to hexokinase deficiency, 235700 (3), Neuropathy, hereditary motor and sensory, Russe type, 605285 (3), Retinitis pigmentosa 79, 617460 (3)
CETP	0.0146888			Hyperalphalipoproteinemia, 143470 (3), [High density lipoprotein cholesterol level QTL 10], 143470 (3)
TMBIM1	0.0146876
AOC2	0.0146827
TET3	0.014671		1
TCF12	0.0146636			Craniosynostosis 3, 615314 (3)
SH2D3C	0.0146622
TMEM42	0.0146581
KIF5B	0.0146464
EGF	0.0146269			Hypomagnesemia 4, renal, 611718 (3)
MAP2K5	0.0146248
FAM92B	0.0146077	2	0
SMCHD1	0.0145994			Bosma arhinia microphthalmia syndrome, 603457 (3), Fascioscapulohumeral muscular dystrophy 2, digenic, 158901 (3)
TM6SF1	0.0145983
KIAA1522	0.0145855
CORO1C	0.0145718
DENND5A	0.0145577			Epileptic encephalopathy, early infantile, 49, 617281 (3)
FRYL	0.0145543
MAP3K7	0.0145435			Cardiospondylocarpofacial syndrome, 157800 (3), Frontometaphyseal dysplasia 2, 617137 (3)
SLC25A29	0.0145308
MAP3K1	0.014515			46XY sex reversal 6, 613762 (3)
RPS9	0.0145106
SLC9C2	0.0145049
EFR3B	0.0145033
FAM186B	0.0144938
RPH3A	0.0144883
CARMIL3	0.0144874
RAPGEF2	0.0144789
CDK14	0.0144778
CCDC102A	0.0144774
TMEM201	0.0144768
CNTNAP1	0.0144751			Lethal congenital contracture syndrome 7, 616286 (3)
KRBA1	0.0144617
OR4K5	0.0144597
DNAH14	0.0144467
KIDINS220	0.0144457			Spastic paraplegia, intellectual disability, nystagmus, and obesity, 617296 (3)
CHST12	0.0144427
GABRD	0.0144371			{Epilepsy, generalized, with febrile seizures plus, type 5, susceptibility to}, 613060 (3), {Epilepsy, idiopathic generalized, 10}, 613060 (3), {Epilepsy, juvenile myoclonic, susceptibility to}, 613060 (3)
TBCEL	0.0144331
RASGRP3	0.01443
TXNRD1	0.0144173
SON	0.0144169	1	0	ZTTK syndrome, 617140 (3)
ALDH3B2	0.0144089
LGALS3BP	0.0144019
NRBP2	0.0143924
ATIC	0.0143782			AICA-ribosiduria due to ATIC deficiency, 608688 (3)
GTF2IRD1	0.0143749
PDE6C	0.0143683			Cone dystrophy 4, 613093 (3)
FRMPD1	0.0143682
KLF11	0.0143641			Maturity-onset diabetes of the young, type VII, 610508 (3)
NCDN	0.01436
KAT8	0.0143579
TRPV5	0.0143548
NPFFR2	0.0143438
MMP9	0.0143406			Metaphyseal anadysplasia 2, 613073 (3)
RAB43	0.01434	2	0
NR3C2	0.014336	1	0	Hypertension, early-onset, autosomal dominant, with exacerbation in pregnancy, 605115 (3), Pseudohypoaldosteronism type I, autosomal dominant, 177735 (3)
NCAPG2	0.0143325
COL23A1	0.0143322
TRAK2	0.0143303
RTL1	0.0143289
INPP5B	0.0143287
TDRD1	0.0143269
IFT81	0.0143056			Short-rib thoracic dysplasia 19 with or without polydactyly, 617895 (3)
PMPCB	0.0143044			Multiple mitochondrial dysfunctions syndrome 6, 617954 (3)
ACADSB	0.014304			2-methylbutyrylglycinuria, 610006 (3)
TEP1	0.0142616
DYNAP	0.0142607
SLC29A3	0.0142605			Histiocytosis-lymphadenopathy plus syndrome, 602782 (3)
NLGN1	0.0142589	2	0
AMPD2	0.0142554			?Spastic paraplegia 63, 615686 (3), Pontocerebellar hypoplasia, type 9, 615809 (3)
ZP4	0.014241
ZBTB46	0.0142312
TESK1	0.0142249
INCENP	0.0142075
CERS2	0.0142064
CNTROB	0.0141998
SETX	0.0141948			Amyotrophic lateral sclerosis 4, juvenile, 602433 (3), Spinocerebellar ataxia, autosomal recessive 1, 606002 (3)
UVSSA	0.0141934			UV-sensitive syndrome 3, 614640 (3)
UBE2H	0.0141885	3	0
SVIL	0.0141653
AATK	0.0141629
KRT86	0.0141616			Monilethrix, 158000 (3)
TOR1AIP1	0.0141558			?Muscular dystrophy, limb-girdle, type 2Y, 617072 (3)
VNN2	0.0141472
CCAR2	0.0141445
ZRANB1	0.0141392
HUWE1	0.0141213		1	Mental retardation, X-linked syndromic, Turner type, 300706 (3)
ZNF335	0.0141196			?Microcephaly 10, primary, autosomal recessive, 615095 (3)
PAPLN	0.0141099
ZNF382	0.0141084
ELP1	0.0141057
ARHGEF15	0.014104
GAREM2	0.0141016
WARS1	0.0140979
NECAB2	0.0140976
FMNL3	0.014095
SCN10A	0.0140718			Episodic pain syndrome, familial, 2, 615551 (3)
JMJD6	0.0140625
RGS12	0.0140598
PLG	0.0140572			Dysplasminogenemia, 217090 (3), Plasminogen deficiency, type I, 217090 (3)
LYSMD4	0.0140492
IL7R	0.0140413			Severe combined immunodeficiency, T-cell negative, B-cell/natural killer cell-positive type, 608971 (3)
NBPF3	0.0140298
VPS50	0.0140262
RADIL	0.0140251
PCDHB16	0.0140039
SLC35C2	0.0140009
LMF1	0.0139906			Lipase deficiency, combined, 246650 (3)
KRTAP1-3	0.0139816
CHIA	0.0139737
GPR1	0.0139699
CD151	0.0139645			Nephropathy with pretibial epidermolysis bullosa and deafness, 609057 (3), [Blood group, Raph], 179620 (3)
ZNF76	0.0139386
CFDP1	0.0139235
ARHGEF5	0.0139171
UBQLN3	0.0139083
CLRN2	0.013906
NEK5	0.0139012
TSG101	0.0138881			Breast cancer, somatic, 114480 (3)
SNRNP200	0.0138862			Retinitis pigmentosa 33, 610359 (3)
MAG	0.01388			Spastic paraplegia 75, autosomal recessive, 616680 (3)
OR2D2	0.0138787
NACC1	0.0138761	1	0	Neurodevelopmental disorder with epilepsy, cataracts, feeding difficulties, and delayed brain myelination, 617393 (3)
PAX4	0.0138738			Diabetes mellitus, type 2, 125853 (3), Maturity-onset diabetes of the young, type IX, 612225 (3), {Diabetes mellitus, ketosis-prone, susceptibility to}, 612227 (3)
CADM1	0.0138606	3	0
EXOC5	0.0138551	3	0
MARK2	0.0138504
ZYX	0.0138503
INO80	0.0138484
CCDC80	0.0138464
NOLC1	0.0138425
OCSTAMP	0.0138398
ELMO3	0.0138397
SRSF3	0.0138362
ZNF568	0.0138315
SIK3	0.0138215
BRD1	0.0138131
PACC1	0.0138127
OR1M1	0.0138095
LRRC40	0.0138052
FGFR1	0.0137988	2	0	Encephalocraniocutaneous lipomatosis, 613001 (3), Hartsfield syndrome, 615465 (3), Hypogonadotropic hypogonadism 2 with or without anosmia, 147950 (3), Jackson-Weiss syndrome, 123150 (3), Osteoglophonic dysplasia, 166250 (3), Pfeiffer syndrome, 101600 (3), Trigonocephaly 1, 190440 (3)
SKIDA1	0.0137929
MYBBP1A	0.0137895
SELENOO	0.0137859
HCAR2	0.0137855
ZXDC	0.013784
EHD1	0.0137752
TSNAXIP1	0.0137748
MCM7	0.0137714
PICK1	0.0137637
DENND5B	0.013748
AKR1C2	0.013744			46XY sex reversal 8, 614279 (3)
DEPDC1B	0.0137429
PCOLCE	0.0137367
RELB	0.0137306			?Immunodeficiency 53, 617585 (3)
SSTR3	0.0137206
LRR1	0.0137202
FAM47B	0.0137133
FBXL16	0.0137082
ANKAR	0.0136976
TMEM63C	0.0136743
NHLRC1	0.0136722			Epilepsy, progressive myoclonic 2B (Lafora), 254780 (3)
MCM8	0.0136663			?Premature ovarian failure 10, 612885 (3)
GNPTG	0.0136586
INTS10	0.0136539
CD274	0.0136487
TECTA	0.0136428	3	0	Deafness, autosomal dominant 8/12, 601543 (3), Deafness, autosomal recessive 21, 603629 (3)
JUP	0.0136415			Arrhythmogenic right ventricular dysplasia 12, 611528 (3), Naxos disease, 601214 (3)
LIPT2	0.0136409			Encephalopathy, neonatal severe, with lactic acidosis and brain abnormalities, 617668 (3)
CUL4B	0.0136366			Mental retardation, X-linked, syndromic 15 (Cabezas type), 300354 (3)
CXCR6	0.0136294
KIF26B	0.0136208
SCAF4	0.0136178	2	0
IGF1R	0.0136176			Insulin-like growth factor I, resistance to, 270450 (3)
KIAA0100	0.0136173
PIBF1	0.0136157			Joubert syndrome 33, 617767 (3)
LRP4	0.0136153			?Myasthenic syndrome, congenital, 17, 616304 (3), Cenani-Lenz syndactyly syndrome, 212780 (3), Sclerosteosis 2, 614305 (3)
WWC3	0.0136093
SBF1	0.0135982	2	0	Charcot-Marie-Tooth disease, type 4B3, 615284 (3)
TAOK3	0.0135905
PHYHD1	0.0135886
IFIH1	0.0135816			Aicardi-Goutieres syndrome 7, 615846 (3), Singleton-Merten syndrome 1, 182250 (3)
PREX1	0.0135717	2	0
ADAMTSL5	0.0135551
PDE4D	0.0135497			Acrodysostosis 2, with or without hormone resistance, 614613 (3), {Stroke, susceptibility to, 1}, 606799 (3)
NKAP	0.0135445
TRIM41	0.0135379
ILDR2	0.0135291
NCOA5	0.0135154
CRACD	0.0135097
SIX3	0.0134983			Holoprosencephaly 2, 157170 (3), Schizencephaly, 269160 (3)
TTC14	0.0134934
MIB1	0.0134924	3	0	Left ventricular noncompaction 7, 615092 (3)
FAM184A	0.0134648
MYO5A	0.0134531	2	0	Griscelli syndrome, type 1, 214450 (3)
SMPD2	0.0134522
CDK19	0.0134347
AKAP4	0.0134246
UBTF	0.0134238			Neurodegeneration, childhood-onset, with brain atrophy, 617672 (3)
CALR	0.0134199			Myelofibrosis, somatic, 254450 (3), Thrombocythemia, somatic, 187950 (3)
SMPD4	0.0134053
LTBP2	0.013399			?Weill-Marchesani syndrome 3, recessive, 614819 (3), Dental anomalies and short stature, 601216 (3), Geleophysic dysplasia 3, 617809 (3), Glaucoma 3, primary congenital, D, 613086 (3), Microspherophakia and/or megalocornea, with ectopia lentis and with or without secondary glaucoma, 251750 (3)
UBN2	0.01339	2	0
ADAMTS18	0.0133888			Microcornea, myopic chorioretinal atrophy, and telecanthus, 615458 (3)
CRYGD	0.0133867			Cataract 4, multiple types, 115700 (3)
UACA	0.0133827
TUB	0.0133767			?Retinal dystrophy and obesity, 616188 (3)
TRPM2	0.0133724
CATSPERG	0.013365
GUCY1A1	0.0133645
RIN2	0.0133546			Macrocephaly, alopecia, cutis laxa, and scoliosis, 613075 (3)
TMEM41A	0.0133525
NOP53	0.0133516
OR5F1	0.0133411
EPB41L2	0.0133401
BICRAL	0.0133337
SORCS1	0.013325
USP45	0.0133245	2	0
NAT8L	0.0133153			?N-acetylaspartate deficiency, 614063 (3)
ZNF404	0.013312
PNLDC1	0.0133077
PGRMC1	0.0133049
REXO1	0.0133012
TMEM45A	0.0133
CEP76	0.0132914
PSMG4	0.0132878
PAPSS2	0.0132793			Brachyolmia 4 with mild epiphyseal and metaphyseal changes, 612847 (3)
GABRG2	0.0132767			Epilepsy, generalized, with febrile seizures plus, type 3, 611277 (3), Febrile seizures, familial, 8, 611277 (3), {Epilepsy, childhood absence, susceptibility to, 2}, 607681 (3)
TNKS	0.0132725
ORC1	0.0132706			Meier-Gorlin syndrome 1, 224690 (3)
MPPED2	0.0132693
DDX50	0.0132457
FSD1	0.0132444
SSPN	0.0132415
NEK9	0.0132394			?Arthrogryposis, Perthes disease, and upward gaze palsy, 614262 (3), Lethal congenital contracture syndrome 10, 617022 (3), Nevus comedonicus, somatic, 617025 (3)
CENPE	0.0132328			?Microcephaly 13, primary, autosomal recessive, 616051 (3)
F2	0.0132214			Dysprothrombinemia, 613679 (3), Hypoprothrombinemia, 613679 (3), Thrombophilia due to thrombin defect, 188050 (3), {Pregnancy loss, recurrent, susceptibility to, 2}, 614390 (3), {Stroke, ischemic, susceptibility to}, 601367 (3)
TBR1	0.0132196	1	0
ATP2B2	0.0132047	2	0	{Deafness, autosomal recessive 12, modifier of}, 601386 (3)
SLC16A10	0.0132047
GYPE	0.0132012
CA4	0.0131982			Retinitis pigmentosa 17, 600852 (3)
CLIC6	0.0131969
FOXP3	0.0131924			Immunodysregulation, polyendocrinopathy, and enteropathy, X-linked, 304790 (3), {Diabetes mellitus, type I, susceptibility to}, 222100 (3)
ZNF114	0.0131923
LRRK2	0.0131835			{Parkinson disease 8}, 607060 (3)
IL17RA	0.0131821			Immunodeficiency 51, 613953 (3)
ITGA3	0.0131797			Interstitial lung disease, nephrotic syndrome, and epidermolysis bullosa, congenital, 614748 (3)
OAF	0.0131718
CD79A	0.0131609			Agammaglobulinemia 3, 613501 (3)
CYP27C1	0.0131601
WDFY4	0.0131595	2	0
PARP14	0.0131589
SLAIN2	0.0131578
SOX10	0.0131536			PCWH syndrome, 609136 (3), Waardenburg syndrome, type 2E, with or without neurologic involvement, 611584 (3), Waardenburg syndrome, type 4C, 613266 (3)
SLC9A1	0.0131503			?Lichtenstein-Knorr syndrome, 616291 (3)
SMC6	0.0131461
NCK2	0.0131361
LY75	0.0131245
PRCD	0.01311			Retinitis pigmentosa 36, 610599 (3)
CYP26A1	0.0131036
PLEKHA4	0.013096
ADRM1	0.0130924
STK19	0.0130779
NAIF1	0.0130689
GCN1	0.0130613
GOLPH3	0.0130609
USP3	0.013054
SF3B2	0.0130463
KISS1	0.0130286			?Hypogonadotropic hypogonadism 13 with or without anosmia, 614842 (3)
OVOL1	0.0130177
YPEL5	0.0130165
EHMT1	0.0130144	1	0	Kleefstra syndrome 1, 610253 (3)
TMEM232	0.0130042
GABRA1	0.0129889			Epileptic encephalopathy, early infantile, 19, 615744 (3), {Epilepsy, childhood absence, susceptibility to, 4}, 611136 (3), {Epilepsy, juvenile myoclonic, susceptibility to, 5}, 611136 (3)
ARMC3	0.0129864
TNFSF10	0.0129853
EVC2	0.0129803			Ellis-van Creveld syndrome, 225500 (3), Weyers acrofacial dysostosis, 193530 (3)
ELK1	0.0129734
DOP1A	0.0129681
RUNDC3B	0.012968
ZC3H3	0.0129657
DDX17	0.0129601
AFP	0.0129558			Alpha-fetoprotein deficiency, 615969 (3), [Hereditary persistence of alpha-fetoprotein], 615970 (3)
CTSF	0.0129546			Ceroid lipofuscinosis, neuronal, 13, Kufs type, 615362 (3)
EXD3	0.0129378
KCNJ15	0.0129317	3	0
TRMT1L	0.0129296
CBWD5	0.0129279
CEP135	0.0129249	2	0	Microcephaly 8, primary, autosomal recessive, 614673 (3)
LY75-CD302	0.0129162
NCR1	0.0129121
SNX13	0.0129081
PRKCE	0.0129066
PGS1	0.0128955
TRIM73	0.0128862
OR5M8	0.0128861
PSEN1	0.0128848			?Acne inversa, familial, 3, 613737 (3), Alzheimer disease, type 3, 607822 (3), Alzheimer disease, type 3, with spastic paraparesis and apraxia, 607822 (3), Alzheimer disease, type 3, with spastic paraparesis and unusual plaques, 607822 (3), Cardiomyopathy, dilated, 1U, 613694 (3), Dementia, frontotemporal, 600274 (3), Pick disease, 172700 (3)
IPO8	0.0128842
SOX6	0.0128825		1
RANBP17	0.0128766	2	0
NEIL2	0.0128721
CREB3L1	0.0128719
GAPVD1	0.0128645
H4C7	0.0128617
SIGLEC1	0.0128594
RFTN1	0.0128572
ANKS6	0.0128542			Nephronophthisis 16, 615382 (3)
REV1	0.0128476
ESPL1	0.0128438
TBC1D2	0.0128388
AZI2	0.0128368
NCAPD2	0.0128324			?Microcephaly 21, primary, autosomal recessive, 617983 (3)
SPI1	0.0128236
RANGAP1	0.0128236
IL27RA	0.0128235
APOBR	0.012818
CD1A	0.0128108
STARD8	0.0128104
PLCB4	0.0128043			Auriculocondylar syndrome 2, 614669 (3)
DENND2D	0.0128033
GRN	0.0128004			Aphasia, primary progressive, 607485 (3), Ceroid lipofuscinosis, neuronal, 11, 614706 (3), Frontotemporal lobar degeneration with ubiquitin-positive inclusions, 607485 (3)
EFHD1	0.012792
SLC9A2	0.0127894
TPBG	0.0127839
IMPG2	0.0127805			Macular dystrophy, vitelliform, 5, 616152 (3), Retinitis pigmentosa 56, 613581 (3)
IFI16	0.0127779
PLEKHG2	0.0127737			Leukodystrophy and acquired microcephaly with or without dystonia, 616763 (3)
CACNA2D2	0.0127698
SBF2	0.0127695			Charcot-Marie-Tooth disease, type 4B2, 604563 (3)
TNS2	0.0127651	3	0
MYB	0.0127537			{T-cell acute lymphoblastic leukemia} (3)
H2AC6	0.0127472
PLPBP	0.0127302
PHYHIP	0.0127288
TCF7L2	0.0127288	1	0	{Diabetes mellitus, type 2, susceptibility to}, 125853 (3)
CERS6	0.0127223
MRFAP1	0.012719
TRA2A	0.0127133
ENPP7	0.0127055
ZNF90	0.0127053
RIC8B	0.0127048
CREB5	0.0127023
PRPSAP2	0.0126996
MVB12B	0.0126987
CA3	0.0126961
TMPRSS7	0.0126917
GRK5	0.0126881
ITFG2	0.0126864
TTC21B	0.0126847			Nephronophthisis 12, 613820 (3), Short-rib thoracic dysplasia 4 with or without polydactyly, 613819 (3)
SEPTIN10	0.0126823
ARHGEF4	0.0126816
SLITRK5	0.0126742	2	0
ZNF366	0.0126719
GBP4	0.0126697
MUCL3	0.0126688
ATM	0.012668			Ataxia-telangiectasia, 208900 (3), Lymphoma, B-cell non-Hodgkin, somatic (3), Lymphoma, mantle cell, somatic (3), T-cell prolymphocytic leukemia, somatic (3), {Breast cancer, susceptibility to}, 114480 (3)
FOXM1	0.012662
SBNO1	0.0126616
AQR	0.012655
L3MBTL1	0.0126512
TRAPPC11	0.01265			Muscular dystrophy, limb-girdle, type 2S, 615356 (3)
RIC3	0.0126499
PHF19	0.0126489
KDM1A	0.0126448			Cleft palate, psychomotor retardation, and distinctive facial features, 616728 (3)
ITGB5	0.0126443
HSD17B6	0.0126379
EMC4	0.0126358
SCN2B	0.0126298			Atrial fibrillation, familial, 14, 615378 (3)
PDCD6	0.0126235
KLHL40	0.0126226			Nemaline myopathy 8, autosomal recessive, 615348 (3)
ZFYVE26	0.0126217	3	0	Spastic paraplegia 15, autosomal recessive, 270700 (3)
SLFN5	0.0126186
NTNG1	0.0126065	3	1
MPRIP	0.0126035
PCDH19	0.0126025	1	0	Epileptic encephalopathy, early infantile, 9, 300088 (3)
SLC2A6	0.0125964
DIAPH3	0.0125948			Auditory neuropathy, autosomal dominant, 1, 609129 (3)
ALDH1L1	0.0125937
KIAA0319	0.0125907
CPA5	0.0125889
MGA	0.0125851
CTNNAL1	0.0125823
TCERG1L	0.0125774
PRSS57	0.0125735
HMG20B	0.0125658
GSKIP	0.0125643
KIFC3	0.0125616
NAV2	0.0125535	2	0
PPP1R12A	0.0125534
TRIM33	0.0125461	3	0
TTC39B	0.0125413
STEAP2	0.0125337
CDH20	0.012528
RNF146	0.0125064
YIF1B	0.0125061
ERGIC2	0.0125014
OR8H1	0.0125008
EIF3G	0.012496	1	0
DFFB	0.0124927
CPZ	0.0124851	3	0
SORCS2	0.012481
KCTD1	0.0124807			Scalp-ear-nipple syndrome, 181270 (3)
DLX4	0.0124785			?Orofacial cleft 15, 616788 (3)
MEDAG	0.0124737
TMEM125	0.0124649
DICER1	0.0124647			Goiter, multinodular 1, with or without Sertoli-Leydig cell tumors, 138800 (3), Pleuropulmonary blastoma, 601200 (3), Rhabdomyosarcoma, embryonal, 2, 180295 (3)
XIRP1	0.01246
LRP3	0.0124517
ZNF711	0.0124506			Mental retardation, X-linked 97, 300803 (3)
FIGLA	0.012447			Premature ovarian failure 6, 612310 (3)
ARHGEF17	0.0124455
CHRNA4	0.0124436			Epilepsy, nocturnal frontal lobe, 1, 600513 (3), {Nicotine addiction, susceptibility to}, 188890 (3)
TGFBR1	0.0124269			Loeys-Dietz syndrome 1, 609192 (3), {Multiple self-healing squamous epithelioma, susceptibility to}, 132800 (3)
ZNF460	0.0124191
FIBP	0.0124181			Thauvin-Robinet-Faivre syndrome, 617107 (3)
PARPBP	0.0124128
TARBP1	0.012412
SWSAP1	0.0124099
TCTE1	0.0124096
KCND3	0.0124012	3	0	Brugada syndrome 9, 616399 (3), Spinocerebellar ataxia 19, 607346 (3)
EPPK1	0.012385	3	0
DGAT1	0.0123772			?Diarrhea 7, 615863 (3)
TUT7	0.0123734
PI16	0.0123661
PKN1	0.0123625
LGALS12	0.0123621
MICAL2	0.0123526
ZNF263	0.012352
VAMP2	0.0123502		1
ZSCAN30	0.0123464
CARD11	0.0123433	3	0	B-cell expansion with NFKB and T-cell anergy, 616452 (3), Immunodeficiency 11A, 615206 (3), Immunodeficiency 11B with atopic dermatitis, 617638 (3)
LAMB4	0.0123428
LEMD3	0.0123291			Buschke-Ollendorff syndrome, 166700 (3), Osteopoikilosis with or without melorheostosis, 166700 (3)
NUP205	0.0123281			?Nephrotic syndrome, type 13, 616893 (3)
NT5C2	0.0123248			Spastic paraplegia 45, autosomal recessive, 613162 (3)
MTIF2	0.0123204
GCOM1	0.0123139
RGPD3	0.0122964
TEX15	0.0122952			Spermatogenic failure 25, 617960 (3)
HEPHL1	0.0122949
ZKSCAN5	0.0122848
EEF2	0.0122714			?Spinocerebellar ataxia 26, 609306 (3)
KRTAP13-4	0.0122676
PPFIA4	0.0122674
UBE2V1	0.0122664
SCN1A	0.0122548	1	0	Epilepsy, generalized, with febrile seizures plus, type 2, 604403 (3), Epileptic encephalopathy, early infantile, 6 (Dravet syndrome), 607208 (3), Febrile seizures, familial, 3A, 604403 (3), Migraine, familial hemiplegic, 3, 609634 (3)
TONSL	0.0122543
ZNF397	0.0122488
GNA11	0.0122473			Hypocalcemia, autosomal dominant 2, 615361 (3), Hypocalciuric hypercalcemia, type II, 145981 (3)
CASKIN2	0.012244
INTS1	0.0122429		1
NR6A1	0.012241
KIAA1217	0.0122399
PCK2	0.0122394			PEPCK deficiency, mitochondrial, 261650 (1)
LRATD1	0.0122246
FCRL5	0.0122245
DNAJC27	0.0122238
MYH1	0.0122228
SHH	0.0122211			Holoprosencephaly 3, 142945 (3), Microphthalmia with coloboma 5, 611638 (3), Schizencephaly, 269160 (3), Single median maxillary central incisor, 147250 (3)
CENPI	0.0122209
AKR1D1	0.0122208			Bile acid synthesis defect, congenital, 2, 235555 (3)
RPL4	0.0122162
PLXNB3	0.0122152
SLC25A3	0.0122091			Mitochondrial phosphate carrier deficiency, 610773 (3)
BCCIP	0.0122091
MTMR3	0.0122081
MGAT5B	0.0122012
SLC25A46	0.0121963			Neuropathy, hereditary motor and sensory, type VIB, 616505 (3)
PNLIP	0.0121956			?Pancreatic lipase deficiency, 614338 (3)
HSD3B1	0.0121829
ALDH6A1	0.0121796			Methylmalonate semialdehyde dehydrogenase deficiency, 614105 (3)
SPIN3	0.0121787
RP1	0.0121663			Retinitis pigmentosa 1, 180100 (3), Symmetric circumferential skin creases, congenital, 2, 616734 (3)
MYO9A	0.012165
TMEM189-UBE2V1	0.0121636
MCL1	0.0121622
DCAF7	0.0121548
AURKB	0.012154
NPC1	0.0121491			Niemann-Pick disease, type C1, 257220 (3), Niemann-Pick disease, type D, 257220 (3), {Nasopharyngeal carcinoma 1} (2)
EED	0.0121488			Cohen-Gibson syndrome, 617561 (3)
GRID1	0.0121457	2	0
NUMB	0.012142
MYZAP	0.0121404
FBXL14	0.0121383
VCAN	0.0121356			Wagner syndrome 1, 143200 (3)
MSS51	0.0121348
KIF11	0.0121261			Microcephaly with or without chorioretinopathy, lymphedema, or mental retardation, 152950 (3)
DLX3	0.0121224	2	0	Amelogenesis imperfecta, type IV, 104510 (3), Trichodontoosseous syndrome, 190320 (3)
TCTN3	0.0121211			Joubert syndrome 18, 614815 (3), Orofaciodigital syndrome IV, 258860 (3)
MAPK6	0.01212
SGCG	0.0121149			Muscular dystrophy, limb-girdle, type 2C, 253700 (3)
LTB4R2	0.0121134
ZC3H4	0.0121042	2	0
ZNF467	0.0121001
TRIM13	0.0120985
TRPV3	0.0120909			?Palmoplantar keratoderma, nonepidermolytic, focal 2, 616400 (3), Olmsted syndrome, 614594 (3)
ZNF850	0.0120738
CTAGE6	0.0120716
PSMD1	0.0120593
OR2M5	0.0120524
TCAIM	0.0120493
TSPAN14	0.012048
ERBIN	0.0120442	2	0
RHOT2	0.0120433
MAST4	0.0120296
ZNF175	0.0120286
BTBD11	0.0120253
PGP	0.0120114
DMRT3	0.0120071
SCUBE1	0.0120029
TOB2	0.0119929
MIPOL1	0.0119922
PDIA4	0.0119845
ADAMTS9	0.0119818
NLRP3	0.0119799			CINCA syndrome, 607115 (3), Deafness, autosomal dominant 34, with or without inflammation, 617772 (3), Familial cold inflammatory syndrome 1, 120100 (3), Keratoendothelitis fugax hereditaria, 148200 (3), Muckle-Wells syndrome, 191900 (3)
NUP85	0.0119737
TFRC	0.011968			Immunodeficiency 46, 616740 (3)
CDON	0.0119641	3	0	Holoprosencephaly 11, 614226 (3)
KIF2B	0.0119628
POR	0.0119594			Antley-Bixler syndrome with genital anomalies and disordered steroidogenesis, 201750 (3), Disordered steroidogenesis due to cytochrome P450 oxidoreductase, 613571 (3)
SPRYD3	0.0119522
FANCD2	0.0119521			Fanconi anemia, complementation group D2, 227646 (3)
DYRK1A	0.0119517	1	0	Mental retardation, autosomal dominant 7, 614104 (3)
PLK5	0.0119432
ATP6V1B2	0.0119359			Deafness, congenital, with onychodystrophy, autosomal dominant, 124480 (3), Zimmermann-Laband syndrome 2, 616455 (3)
ARHGAP20	0.0119355
MYLK	0.0119263	3	0	Aortic aneurysm, familial thoracic 7, 613780 (3)
RBSN	0.0119202
HSP90AA1	0.0119177
STAP2	0.0119124
TLR8	0.0119089
DDR1	0.0119028
CPNE4	0.0119003
CNST	0.0118859
RORC	0.0118836			Immunodeficiency 42, 616622 (3)
USP13	0.0118824
SNTB2	0.0118811
ZRANB3	0.0118796
NPHP4	0.0118742			Nephronophthisis 4, 606966 (3), Senior-Loken syndrome 4, 606996 (3)
HEPACAM	0.0118718		1	Megalencephalic leukoencephalopathy with subcortical cysts 2A, 613925 (3), Megalencephalic leukoencephalopathy with subcortical cysts 2B, remitting, with or without mental retardation, 613926 (3)
NR4A1	0.011865
MRPS30	0.0118647
BRICD5	0.0118507
RREB1	0.0118403
AKAP9	0.011826	2	0	?Long QT syndrome-11, 611820 (3)
SLC23A1	0.0118252
PSMD8	0.011825
HELB	0.0118192
MAMDC4	0.0118148
DHX9	0.0118071
DNAJC11	0.0118043
PLEKHA1	0.0118033
PMM2	0.0118007			Congenital disorder of glycosylation, type Ia, 212065 (3)
SYMPK	0.0117992
ATP2C2	0.0117968
SERPINE3	0.01179
EPS8	0.0117831			?Deafness, autosomal recessive 102, 615974 (3)
ZNF837	0.0117732
MGRN1	0.0117731
HMGCL	0.0117725			HMG-CoA lyase deficiency, 246450 (3)
NCOR1	0.0117461	2	0
PCID2	0.0117429
INSRR	0.0117352
SLC6A19	0.0117343			Hartnup disorder, 234500 (3), Hyperglycinuria, 138500 (3), Iminoglycinuria, digenic, 242600 (3)
P2RX1	0.0117322
PSTPIP2	0.0117312
SNX5	0.0117305	2	0
PSMD4	0.0117288
TKTL2	0.0117278
MAPK8IP1	0.0117238			{Diabetes mellitus, noninsulin-dependent}, 125853 (3)
CAPN12	0.0117228	3	0
NRIP2	0.0117226
TSPYL2	0.0117184
GSAP	0.0117116
COBL	0.0117106
PERP	0.0117011
RRAGD	0.0117004
DDX60L	0.0116969
KLHL17	0.0116967
TG	0.0116955			Thyroid dyshormonogenesis 3, 274700 (3), {Autoimmune thyroid disease, susceptibility to, 3}, 608175 (3)
ARHGEF16	0.0116931
EXOSC3	0.0116926			Pontocerebellar hypoplasia, type 1B, 614678 (3)
RAB19	0.0116914
JPH4	0.0116873
MAML1	0.0116811
KLF5	0.0116787
PML	0.0116787			Leukemia, acute promyelocytic, PML/RARA type (3)
ATXN3	0.0116653			Machado-Joseph disease, 109150 (3)
METTL8	0.011659
RDH5	0.0116586			Fundus albipunctatus, 136880 (3)
SMC2	0.0116578			Smith-McCort dysplasia 2, 615222 (3)
KDM6A	0.0116494	2	0	Kabuki syndrome 2, 300867 (3)
SERPIND1	0.0116492			Thrombophilia due to heparin cofactor II deficiency, 612356 (3)
ERCC6L	0.0116476
TECRL	0.0116468			Ventricular tachycardia, catecholaminergic polymorphic, 3, 614021 (3)
YIPF4	0.0116442
TEX9	0.0116426
CELSR2	0.0116355
PRDM7	0.0116304
OMP	0.0116293
CHD3	0.011627	1	0
GPAA1	0.0116266			Glycosylphosphatidylinositol biosynthesis defect 15, 617810 (3)
RAI1	0.011621	1	0	Smith-Magenis syndrome, 182290 (3)
PGA5	0.0116207
PHF24	0.0116195
BBS9	0.0116129			Bardet-Biedl syndrome 9, 615986 (3)
CYP27A1	0.011602		1	Cerebrotendinous xanthomatosis, 213700 (3)
DOCK6	0.0115976			Adams-Oliver syndrome 2, 614219 (3)
EME1	0.0115897
NPAS1	0.0115839
CCT6B	0.0115814
ATP23	0.0115746
EPHA1	0.0115452
PCDHB2	0.0115404
CAVIN4	0.0115394
PCDHGC5	0.0115249
H4C11	0.0115179
ZBTB21	0.0115131
SLC16A2	0.0115113			Allan-Herndon-Dudley syndrome, 300523 (3)
POTEM	0.011507
RASAL1	0.0115047
AMACR	0.0115005			Alpha-methylacyl-CoA racemase deficiency, 614307 (3), Bile acid synthesis defect, congenital, 4, 214950 (3)
KIAA1211L	0.0114978
PDGFRA	0.0114831			Gastrointestinal stromal tumor, somatic, 606764 (3), Hypereosinophilic syndrome, idiopathic, resistant to imatinib, 607685 (3)
ENTR1	0.0114804
CDH23	0.0114721			Deafness, autosomal recessive 12, 601386 (3), Usher syndrome, type 1D, 601067 (3), Usher syndrome, type 1D/F digenic, 601067 (3), {Pituitary adenoma 5, multiple types}, 617540 (3)
CD109	0.0114675
SETD1B	0.0114654	3	1
CALHM3	0.0114637
NKX1-2	0.0114611
WDR37	0.0114581
TBC1D31	0.0114553	2	0
DUSP14	0.011443
MTMR6	0.011439
ZNF596	0.0114292
CCNT1	0.0114273
EXOC2	0.0114262
MINDY3	0.0114262
OR5AC2	0.0114189
KRT77	0.0114176
SNAPC3	0.0114027
PLCB3	0.0113984
ST6GALNAC4	0.0113854
UGT2A1	0.0113824
IGFBP7	0.0113786			Retinal arterial macroaneurysm with supravalvular pulmonic stenosis, 614224 (3)
EDC4	0.0113721
PDE6A	0.0113672			Retinitis pigmentosa 43, 613810 (3)
MTMR8	0.011367
IFRD2	0.0113626
MSH6	0.0113616			Colorectal cancer, hereditary nonpolyposis, type 5, 614350 (3), Endometrial cancer, familial, 608089 (3), Mismatch repair cancer syndrome, 276300 (3)
CAPN5	0.0113511			Vitreoretinopathy, neovascular inflammatory, 193235 (3)
IKZF1	0.0113491			Immunodeficiency, common variable, 13, 616873 (3)
SHANK1	0.0113433	2	0
BAX	0.0113422			Colorectal cancer, somatic, 114500 (3), T-cell acute lymphoblastic leukemia, somatic, 613065 (3)
ETS2	0.011329
ZFPM1	0.0113249
KCNMB3	0.0113187
OTP	0.0113113
DNAJA4	0.01131
ABLIM2	0.0113091
ATP6V0A1	0.0113011
RTN3	0.0113005
UGGT2	0.0112975
ABCC4	0.0112974
MARF1	0.0112936
UGT2A2	0.0112833
ARPC1A	0.0112825
DLEC1	0.0112816			Esophageal cancer, 133239 (1), Lung cancer, 211980 (1)
EXD2	0.0112782
KBTBD7	0.0112768
ULK1	0.011274
CHRNG	0.0112683			Escobar syndrome, 265000 (3), Multiple pterygium syndrome, lethal type, 253290 (3)
EFR3A	0.0112675	2	0
WSCD2	0.0112623
SOX13	0.0112572
MAPK8IP3	0.0112567
DEFB110	0.0112553
RGN	0.0112548
CAP2	0.0112463			Peeling skin syndrome 5, 617115 (3)
LINGO1	0.0112404
ZNF546	0.0112321
GATA4	0.0112259			?Testicular anomalies with or without congenital heart disease, 615542 (3), Atrial septal defect 2, 607941 (3), Atrioventricular septal defect 4, 614430 (3), Tetralogy of Fallot, 187500 (3), Ventricular septal defect 1, 614429 (3)
RSPH6A	0.0112245
ENPP3	0.0112215
MMS22L	0.01122
MPG	0.0112194
DDX53	0.0112193	3	0
GPNMB	0.0112187			Amyloidosis, primary localized cutaneous, 3, 617920 (3)
COPE	0.0112153
STIM1	0.0112149			Immunodeficiency 10, 612783 (3), Myopathy, tubular aggregate, 1 160565 (3), Stormorken syndrome, 185070 (3)
KIRREL2	0.0112093
RP2	0.0112084			Retinitis pigmentosa 2, 312600 (3)
COMT	0.0112029			{Panic disorder, susceptibility to}, 167870 (3), {Schizophrenia, susceptibility to}, 181500 (3)
DPT	0.0111956
COPS2	0.0111915
GLE1	0.0111915			Arthrogryposis, lethal, with anterior horn cell disease, 611890 (3), Lethal congenital contracture syndrome 1, 253310 (3)
IPO13	0.0111887
AHR	0.0111838
PAFAH1B2	0.0111838	3	0
TUBB4B	0.0111835			Leber congenital amaurosis with early-onset deafness, 617879 (3)
DMXL2	0.0111819	3	0	?Deafness, autosomal dominant 71, 617605 (3), ?Polyendocrine-polyneuropathy syndrome, 616113 (3)
IQCB1	0.0111714			Senior-Loken syndrome 5, 609254 (3)
GYG2	0.0111712
CCDC158	0.0111684
JAG2	0.0111648
PKD2L1	0.0111593
AKNAD1	0.0111542
ARNT2	0.0111517	3	0	?Webb-Dattani syndrome, 615926 (3)
KIF18A	0.0111509
RNF20	0.0111495
PRRC2B	0.0111404
TEX33	0.0111305
GPR179	0.0111304			Night blindness, congenital stationary (complete), 1E, autosomal recessive, 614565 (3)
PPP1CB	0.0111278			Noonan syndrome-like disorder with loose anagen hair 2, 617506 (3)
TRPC5	0.0111272
ZFAND2B	0.0111259
PKP2	0.0111215			Arrhythmogenic right ventricular dysplasia 9, 609040 (3)
DVL2	0.0111179
CSH2	0.0111141
SETD5	0.0110993	1	0	Mental retardation, autosomal dominant 23, 615761 (3)
HNRNPUL1	0.0110989
TMEM163	0.0110955
DCAF4L1	0.011089
STK17B	0.0110873
ANKEF1	0.0110848
GNRHR	0.0110842			Hypogonadotropic hypogonadism 7 without anosmia, 146110 (3)
PRR18	0.0110791
RESF1	0.0110701
ASB16	0.0110683
CEACAM6	0.0110673
ABCC12	0.0110641
CR1	0.0110598			CR1 deficiency (1), [Blood group, Knops system], 607486 (3), {?SLE susceptibility} (1), {Malaria, severe, resistance to}, 611162 (3)
VGLL2	0.0110587
RARA	0.0110583			Leukemia, acute promyelocytic, 612376 (1)
CBX7	0.0110468
ADRA1D	0.0110425
RPL30	0.0110417
ATP10B	0.0110406
SFPQ	0.0110397
CHD1L	0.0110329
PPFIBP2	0.0110299
L3MBTL2	0.0110293
PTCD1	0.011028
HSD17B2	0.0110257
TOLLIP	0.0110231
LAMA4	0.011023			Cardiomyopathy, dilated, 1JJ, 615235 (3)
ZZEF1	0.0110212
TELO2	0.0110123			You-Hoover-Fong syndrome, 616954 (3)
ZNF606	0.0110061
EXOC6B	0.0110056	3	0
IGSF11	0.0109939
ADCY10	0.0109849			{Hypercalciuria, absorptive, susceptibility to}, 143870 (3)
TBCB	0.0109844
FYN	0.0109794
SFRP2	0.0109792
PKD1L1	0.0109656			Heterotaxy, visceral, 8, autosomal, 617205 (3)
RTN4	0.0109646
ZNF253	0.0109595
SNX19	0.0109594
RELCH	0.0109583
GALNT14	0.0109577	3	0
CCDC59	0.0109566
NFKBIE	0.0109368
ATP6AP2	0.0109317			?Parkinsonism with spasticity, X-linked, 300911 (3), Mental retardation, X-linked, syndromic, Hedera type, 300423 (3)
ADAM17	0.010931			?Inflammatory skin and bowel disease, neonatal, 1, 614328 (3)
CCDC146	0.0109136
CAMSAP3	0.0109116
GLRA3	0.0109103
NRXN2	0.0109071	1	0
PHF21B	0.0109058
KCNS1	0.0108985
DCAF13	0.0108941
AARS2	0.0108939			Combined oxidative phosphorylation deficiency 8, 614096 (3), Leukoencephalopathy, progressive, with ovarian failure, 615889 (3)
DHX58	0.0108937
LAMB2	0.010893			Nephrotic syndrome, type 5, with or without ocular abnormalities, 614199 (3), Pierson syndrome, 609049 (3)
DARS2	0.0108865			Leukoencephalopathy with brain stem and spinal cord involvement and lactate elevation, 611105 (3)
ABCA7	0.0108841	3	0	{Alzheimer disease 9, susceptibility to}, 608907 (3)
CNP	0.0108833
MICAL3	0.0108784
FLNA	0.0108781			?FG syndrome 2, 300321 (3), Cardiac valvular dysplasia, X-linked, 314400 (3), Congenital short bowel syndrome, 300048 (3), Frontometaphyseal dysplasia 1, 305620 (3), Heterotopia, periventricular, 300049 (3), Intestinal pseudoobstruction, neuronal, 300048 (3), Melnick-Needles syndrome, 309350 (3), Otopalatodigital syndrome, type I, 311300 (3), Otopalatodigital syndrome, type II, 304120 (3), Termin…
FAXC	0.0108724
HEATR1	0.0108705
RAB2A	0.0108601	2	0
CROCC	0.0108559
CHAC1	0.0108544
CCDC22	0.0108532			Ritscher-Schinzel syndrome 2, 300963 (3)
GPR139	0.0108471
TSHR	0.0108464			Hyperthyroidism, familial gestational, 603373 (3), Hyperthyroidism, nonautoimmune, 609152 (3), Hypothyroidism, congenital, nongoitrous, 1 275200 (3), Thyroid adenoma, hyperfunctioning, somatic (3), Thyroid carcinoma with thyrotoxicosis (3)
PRDM5	0.0108374			Brittle cornea syndrome 2, 614170 (3)
ATP5F1C	0.0108304
L1TD1	0.010821
LRIG2	0.0108197			Urofacial syndrome 2, 615112 (3)
PREP	0.0108126
NAV1	0.0108094
SNAP91	0.0108042
DMRTA1	0.0107993
SOX5	0.0107918	1	0	Lamb-Shaffer syndrome, 616803 (3)
MAGEA8	0.0107877
ZNF256	0.0107869
DDX20	0.0107849
ALKAL1	0.0107824
ANGPTL7	0.010781
RPL7A	0.0107716
CCT2	0.0107708
CCNB1	0.0107699
NOX5	0.0107621
FMNL2	0.0107594
FTSJ3	0.0107549
AMD1	0.0107391
DOK7	0.010738			?Fetal akinesia deformation sequence, 208150 (3), Myasthenic syndrome, congenital, 10, 254300 (3)
SPSB4	0.0107374
SALL4	0.0107294			Duane-radial ray syndrome, 607323 (3), IVIC syndrome, 147750 (3)
GTF2H3	0.0107245
CDADC1	0.0107186
SLC66A2	0.0107183
TMEM61	0.0107164
SH3D21	0.0107139
SLC9A3R2	0.0107135
CCDC130	0.0107107
EPG5	0.0107063			Vici syndrome, 242840 (3)
DHCR24	0.0106928			Desmosterolosis, 602398 (3)
SP100	0.0106828
ASTE1	0.0106799
B3GALT2	0.0106785
SLC1A4	0.0106723			Spastic tetraplegia, thin corpus callosum, and progressive microcephaly, 616657 (3)
XYLT2	0.010668			Spondyloocular syndrome, 605822 (3), {Pseudoxanthoma elasticum, modifier of severity of}, 264800 (3)
ATP13A4	0.010663
HLA-DMB	0.0106605
SNX33	0.0106567
TEAD4	0.0106555
HNRNPU	0.010654	1	0	Epileptic encephalopathy, early infantile, 54, 617391 (3)
SLC12A1	0.0106516			Bartter syndrome, type 1, 601678 (3)
ATP5MF-PTCD1	0.0106334
SH3GL2	0.0106309
KIAA1614	0.0106305
HIP1	0.0106267			{Prostate cancer, progression of}, 176807 (1)
SH3BP2	0.0106203			Cherubism, 118400 (3)
CP	0.0105946			Cerebellar ataxia, 604290 (3), Hemosiderosis, systemic, due to aceruloplasminemia, 604290 (3), [Hypoceruloplasminemia, hereditary], 604290 (3)
SCN11A	0.0105842			Episodic pain syndrome, familial, 3, 615552 (3), Neuropathy, hereditary sensory and autonomic, type VII, 615548 (3)
ARIH1	0.0105823
TBX4	0.0105814			Ischiocoxopodopatellar syndrome, 147891 (3)
VEZF1	0.0105808	1	0
FAM72B	0.0105778
WASL	0.0105684
VRK2	0.010568
CPNE5	0.0105618
CEMP1	0.0105605
TIGD7	0.0105601
DYTN	0.0105533
MGAT4C	0.010543
POU4F3	0.0105361			Deafness, autosomal dominant 15, 602459 (3)
CELF4	0.0105329	1	0
BNC2	0.0105314
LCA5	0.0105244			Leber congenital amaurosis 5, 604537 (3)
OSBP2	0.0105206
PKN2	0.0105191
SHANK3	0.0105171	1	0	Phelan-McDermid syndrome, 606232 (3), {Schizophrenia 15}, 613950 (3)
ARL17B	0.0105111
DACT1	0.0105107			?Townes-Brocks syndrome 2, 617466 (3)
USF2	0.0105103
NIPSNAP1	0.0105099
SRSF9	0.0105076
CEP170	0.0104974
XPO5	0.0104953
MED13L	0.0104943	1	0	Mental retardation and distinctive facial features with or without cardiac defects, 616789 (3), Transposition of the great arteries, dextro-looped 1, 608808 (3)
MAPK11	0.0104861
EPX	0.0104846			[Eosinophil peroxidase deficiency], 261500 (3)
USP42	0.0104719
UPF3B	0.0104702	1	0	Mental retardation, X-linked, syndromic 14, 300676 (3)
SPATA5L1	0.010464
HIBCH	0.0104569			3-hydroxyisobutryl-CoA hydrolase deficiency, 250620 (3)
CBFA2T3	0.0104562
RHNO1	0.0104488
AQP10	0.0104478
CYP4F22	0.0104382			Ichthyosis, congenital, autosomal recessive 5, 604777 (3)
FAM174B	0.0104381
NEURL2	0.0104224
PRKACG	0.0104152			?Bleeding disorder, platelet-type, 19, 616176 (3)
GMPS	0.0104137
GPD1	0.0104075			Hypertriglyceridemia, transient infantile, 614480 (3)
EPS8L2	0.0104064			Deafness autosomal recessive 106, 617637 (3)
KLHL28	0.0104058
MED12L	0.0104041	3	1
GAS6	0.0104007
FAM98A	0.0103984
GPR55	0.0103961
HUNK	0.0103959
FANCD2OS	0.0103922
ZNF423	0.0103916			Joubert syndrome 19, 614844 (3), Nephronophthisis 14, 614844 (3)
PHGDH	0.0103859			Neu-Laxova syndrome 1, 256520 (3), Phosphoglycerate dehydrogenase deficiency, 601815 (3)
HCN3	0.0103853
RAB6B	0.0103852
GOLGA8A	0.0103834
OR52N1	0.0103795
FNBP1L	0.0103777
SACS	0.0103708			Spastic ataxia, Charlevoix-Saguenay type, 270550 (3)
CD1C	0.0103646
TPSB2	0.0103639
ZSCAN32	0.0103633
COPA	0.0103609			{Autoimmune interstitial lung, joint, and kidney disease}, 616414 (3)
ZNRF4	0.0103566
LTBP4	0.0103428			Cutis laxa, autosomal recessive, type IC, 613177 (3)
CFAP74	0.0103417
TEKT5	0.0103414
POM121	0.0103412
FBXO22	0.0103403
ADARB1	0.0103403
OTOA	0.010335			Deafness, autosomal recessive 22, 607039 (3)
AKAP2	0.0103308
RASGRF1	0.0103242
FCGR3B	0.0103137			Neutropenia, alloimmune neonatal (3)
PRKCSH	0.0103048			Polycystic liver disease 1, 174050 (3)
NDST2	0.0103016
MED12	0.0102994			Lujan-Fryns syndrome, 309520 (3), Ohdo syndrome, X-linked, 300895 (3), Opitz-Kaveggia syndrome, 305450 (3)
GPR174	0.0102981
REPIN1	0.0102883
TCFL5	0.0102866
ACKR1	0.0102777			[Blood group, Duffy system], 110700 (3), [White blood cell count QTL], 611862 (3), {Malaria, vivax, protection against}, 611162 (3)
TMTC1	0.0102729
TMF1	0.0102717
FCRLA	0.0102708
RP1L1	0.0102694			Occult macular dystrophy, 613587 (3)
ADAM12	0.0102599
NAA10	0.0102469			?Microphthalmia, syndromic 1, 309800 (3), Ogden syndrome, 300855 (3)
MYSM1	0.0102433
MAD1L1	0.0102423			Lymphoma, somatic (3), Prostate cancer, somatic, 176807 (3)
AQP12A	0.0102283
MIP	0.0102236			Cataract 15, multiple types, 615274 (3)
ZMYND15	0.0102216			?Spermatogenic failure 14, 615842 (3)
DSC3	0.0102209			?Hypotrichosis and recurrent skin vesicles, 613102 (3), Arrhythmogenic right ventricular dysplasia 11 with mild palmoplantar keratoderma and woolly hair, 610476 (3), Arrhythmogenic right ventricular dysplasia 11, 610476 (3)
PLCL2	0.0102193
FKBP15	0.0102045
SLC26A1	0.0101972			?Nephrolithiasis, calcium oxalate, 167030 (3)
SF3B1	0.0101865	3	0	Myelodysplastic syndrome, somatic, 614286 (3)
TIPIN	0.0101838
IL33	0.0101796
SYT11	0.0101736
KLHDC10	0.0101725
PALM2AKAP2	0.0101678
ECD	0.0101676
TBL2	0.0101499
ZNF550	0.0101426
GLOD4	0.0101341
DMAP1	0.0101317
ANKK1	0.0101306
PI4KA	0.0101262			Polymicrogyria, perisylvian, with cerebellar hypoplasia and arthrogryposis, 616531 (3)
SEC31A	0.0101203
DEF8	0.0101192
FAM71A	0.0101139
UNC119	0.0101112			?Cone-rod dystrophy (3), ?Immunodeficiency 13, 615518 (3)
RBPJL	0.0101044
ZNF766	0.0101005
CCN1	0.0100941
PRAMEF2	0.0100939
RPL19	0.0100806
SCARA5	0.0100786
ZNF221	0.0100727
SCAF8	0.0100483
POU3F1	0.0100449
DUSP15	0.0100371	3	0
GAS8	0.0100352			Ciliary dyskinesia, primary, 33, 616726 (3)
PPARGC1B	0.0100287			{Obesity, variation in}, 601665 (3)
PRPF6	0.0100255			Retinitis pigmentosa 60, 613983 (3)
ZNF419	0.0100176
OR4X2	0.0100017
PER1	0.00999946	3	0
IRGC	0.00998919
TRPM6	0.00997556			Hypomagnesemia 1, intestinal, 602014 (3)
SH3BP5L	0.00997314
GZF1	0.00996129			Joint laxity, short stature, and myopia, 617662 (3)
RNF151	0.00995736
LRRC8E	0.00995372
CACHD1	0.00994731
TOPORS	0.00994339			Retinitis pigmentosa 31, 609923 (3)
ASB14	0.00994224	3	0
CNTLN	0.0099322
IK	0.00993023
RBBP4	0.00992492
IMPACT	0.00992075
TEKT3	0.00992057
FSHB	0.00990781			Hypogonadotropic hypogonadism 24 without anosmia, 229070 (3)
PEPD	0.00990053			Prolidase deficiency, 170100 (3)
DPY19L3	0.00990003
PRMT8	0.0098981
TBC1D8B	0.00989444
DLG5	0.00989076
CHD1	0.00988574	3	1	Pilarowski-Bjornsson syndrome, 617682 (3)
DMPK	0.00988538	1	0	Myotonic dystrophy 1, 160900 (3)
RDH8	0.00988167
RNF128	0.0098792
TRDMT1	0.00987676
PSMG2	0.00987568
PLCD4	0.0098725	3	0
CDH2	0.009864
PBX3	0.00985839
ZMIZ2	0.00985723
ZNF732	0.00985673
NOL10	0.00985417
MIGA2	0.00985105
HLA-DQA1	0.00985037			{Celiac disease, susceptibility to}, 212750 (3)
ECT2L	0.00984105
CSNK2B	0.00983964
ZNF721	0.00983301
SOHLH2	0.00982574
MZB1	0.00982478
MAPKBP1	0.00982242			Nephronophthisis 20, 617271 (3)
RCOR2	0.0098155
TAF4	0.00981062
NIBAN2	0.0097984
PIWIL4	0.00978845
OR10Z1	0.0097833
KRT5	0.00978178			Dowling-Degos disease 1, 179850 (3), Epidermolysis bullosa simplex, Dowling-Meara type, 131760 (3), Epidermolysis bullosa simplex, Koebner type, 131900 (3), Epidermolysis bullosa simplex, Weber-Cockayne type, 131800 (3), Epidermolysis bullosa simplex, recessive 1, 601001 (3), Epidermolysis bullosa simplex-MCR, 609352 (3), Epidermolysis bullosa simplex-MP, 131960 (3)
TUBB8	0.00977226			Oocyte maturation defect 2, 616780 (3)
GABRQ	0.00976269
ATG4A	0.00976166
SHOX	0.00975588	2	0	Langer mesomelic dysplasia, 249700 (3), Leri-Weill dyschondrosteosis, 127300 (3), Short stature, idiopathic familial, 300582 (3)
CACNA1E	0.00975036	1	0
CRPPA	0.00973575
ZSWIM2	0.00973414
GPR75	0.00971171
GSK3A	0.00970802
STAG3	0.00970039			Premature ovarian failure 8, 615723 (3)
UGGT1	0.00969134
CCDC169-SOHLH2	0.00969068
PSENEN	0.0096904			Acne inversa, familial, 2, with or without Dowling-Degos disease, 613736 (3)
FAM180B	0.00968925
WDR81	0.00968808			Cerebellar ataxia, mental retardation, and dysequilibrium syndrome 2, 610185 (3), Hydrocephalus, nonsyndromic, autosomal recessive 3, 617967 (3)
WARS2	0.00968678			Neurodevelopmental disorder, mitochondrial, with abnormal movements and lactic acidosis, with or without seizures, 617710 (3)
PKD2	0.00968497			Polycystic kidney disease 2, 613095 (3)
NHS	0.00967789			Cataract 40, X-linked, 302200 (3), Nance-Horan syndrome, 302350 (3)
SFTPD	0.00965669
ASB1	0.00964917
LPCAT2	0.00964906
PPM1A	0.00964315
ARHGAP32	0.00964294	3	0
ANKRD66	0.00964148
ST6GALNAC6	0.00963586
DCDC2B	0.00963447
PDSS2	0.00963081			Coenzyme Q10 deficiency, primary, 3, 614652 (3)
ADD1	0.00962679			{Hypertension, essential, salt-sensitive}, 145500 (3)
MYCBP2	0.00962357
SH3PXD2A	0.00960942
TRIML1	0.00960662
PRKAR1B	0.00960507	3	0
ELL	0.00960318
SIK2	0.00960013
AADACL2	0.0095935
DUS1L	0.00959136
UBAP2	0.00959051
HRH2	0.00958009
CYP4F3	0.00957804
SLC2A14	0.00955896
ANKRD52	0.00955729
KAT2B	0.00955591	2	0
PPP1R15A	0.00954596
HIGD2A	0.00954512
BCAT1	0.00954468			?Hyperleucinemia-isoleucinemia or hypervalinemia (1)
STAU2	0.00954253
PPP1R9B	0.00953061	1	0
RPF1	0.00953022
PHF12	0.00952875	1	0
INSR	0.00952124			Diabetes mellitus, insulin-resistant, with acanthosis nigricans, 610549 (3), Hyperinsulinemic hypoglycemia, familial, 5, 609968 (3), Leprechaunism, 246200 (3), Rabson-Mendenhall syndrome, 262190 (3)
HCRTR1	0.00951842
PRPH	0.00951495			Choroidal dystrophy, central areolar 2, 613105 (3), Leber congenital amaurosis 18, 608133 (3), Macular dystrophy, patterned, 1, 169150 (3), Macular dystrophy, vitelliform, 3, 608161 (3), Retinitis pigmentosa 7 and digenic, 608133 (3), Retinitis punctata albescens, 136880 (3), {Amyotrophic lateral sclerosis, susceptibility to}, 105400 (3)
BRF1	0.00951442			Cerebellofaciodental syndrome, 616202 (3)
FRMD3	0.00951349
ZBTB8B	0.00950533
RRP12	0.00950175
SHKBP1	0.009501
THRAP3	0.00950047
FNDC3B	0.00949879
ACTA1	0.00949277			?Myopathy, scapulohumeroperoneal, 616852 (3), Myopathy, actin, congenital, with cores, 161800 (3), Myopathy, actin, congenital, with excess of thin myofilaments, 161800 (3), Myopathy, congenital, with fiber-type disproportion 1, 255310 (3), Nemaline myopathy 3, autosomal dominant or recessive, 161800 (3)
OR11L1	0.0094921
ZNF420	0.00948594
HPSE2	0.00948169			Urofacial syndrome 1, 236730 (3)
MAP3K4	0.00948111
OPN1MW2	0.00947554
COL11A1	0.00947418			Fibrochondrogenesis 1, 228520 (3), Marshall syndrome, 154780 (3), Stickler syndrome, type II, 604841 (3), {Lumbar disc herniation, susceptibility to}, 603932 (3)
ZAR1	0.00946698
FBXL3	0.00946536
ANKRD50	0.0094643
FIZ1	0.00946234
COG8	0.00945552			Congenital disorder of glycosylation, type IIh, 611182 (3)
FCGBP	0.00945151
SP7	0.00943757			?Osteogenesis imperfecta, type XII, 613849 (3)
ASIC2	0.00943423
NKX3-2	0.00943036			Spondylo-megaepiphyseal-metaphyseal dysplasia, 613330 (3)
AMBRA1	0.00942916
S100A1	0.00942684
H1-5	0.00942619
CLCA4	0.00942603
CBWD1	0.00942546
RBP7	0.00942244
MNS1	0.00942143
ENOX1	0.00941804
ZNF414	0.00941767
PIK3IP1	0.00941695
LY6G6F	0.0094119
TRERF1	0.00940913
BMPER	0.00940627			Diaphanospondylodysostosis, 608022 (3)
MINDY2	0.00940379
KCNH8	0.00939712
ACP2	0.0093971			?Lysosomal acid phosphatase deficiency, 200950 (1)
MMRN2	0.00939619
G6PC2	0.00939588
SCG2	0.00938737
COP1	0.00938469
DCLRE1A	0.00938109
HEATR6	0.00937487
SLX4IP	0.0093728
CDC42EP4	0.00936863
PIK3R2	0.00936415		1	Megalencephaly-polymicrogyria-polydactyly-hydrocephalus syndrome 1, 603387 (3)
CFI	0.00936319			Complement factor I deficiency, 610984 (3), {Hemolytic uremic syndrome, atypical, susceptibility to, 3}, 612923 (3), {Macular degeneration, age-related, 13, susceptibility to}, 615439 (3)
ZNF665	0.00936023
C1RL	0.00935981
AMMECR1	0.00935653			Midface hypoplasia, hearing impairment, elliptocytosis, and nephrocalcinosis, 300990 (3)
MIEN1	0.00935545
ITGB2	0.0093553			Leukocyte adhesion deficiency, 116920 (3)
ZNF662	0.00935492
PDIA2	0.00935441
SNTG1	0.00935264
H3C1	0.00935223
KRT80	0.00934671
PLEKHM2	0.00933623
BMP1	0.00932582			Osteogenesis imperfecta, type XIII, 614856 (3)
[truncated: 16,989 more rows]
